# Supplementary material for: Genomic reconstruction of the SARS-CoV-2 epidemic in England
Source: PubMed Central journal article supplement (PMC8674138; doi:10.1038/s41586-021-04069-y), 2021-10-14
Supplement: 41586_2021_4069_MOESM1_ESM.pdf [file 41586_2021_4069_MOESM1_ESM.pdf]

**Supplementary information**

---

**Genomic reconstruction of the SARS-CoV-2 epidemic in England**

---

In the format provided by the authors and unedited

# Genomic reconstruction of the SARS-CoV-2 epidemic in England

Harald S. Vöhringer<sup>1,2</sup>, Theo Sanderson<sup>3,4</sup>, Matthew Sinnott<sup>3,4</sup>, Nicola De Maio<sup>1</sup>, Thuy Nguyen<sup>3</sup>, Richard Goater<sup>3</sup>, Frank Schwach<sup>3,5</sup>, Ian Harrison<sup>5</sup>, Joel Hellewell<sup>6</sup>, Cristina Ariani<sup>3</sup>, Sonia Gonçalves<sup>3</sup>, David Jackson<sup>3</sup>, Ian Johnston<sup>3</sup>, Alexander W. Jung<sup>1</sup>, Callum Saint<sup>3</sup>, John Sillitoe<sup>3</sup>, Maria Suciuc<sup>3</sup>, Nick Goldman<sup>1</sup>, Jasmina Panovska-Griffiths<sup>2,7</sup>, The Wellcome Sanger Institute Covid-19 Surveillance Team<sup>8</sup>, The COVID-19 Genomics UK (COG-UK) Consortium<sup>9</sup>, Ewan Birney<sup>1</sup>, Erik Volz<sup>10</sup>, Sebastian Funk<sup>6</sup>, Dominic Kwiatkowski<sup>3</sup>, Meera Chand<sup>5,11</sup>, Inigo Martincorena<sup>3</sup>, Jeffrey C. Barrett<sup>3,\*</sup>, and Moritz Gerstung<sup>1,12,\*</sup>

<sup>1</sup>*European Molecular Biology Laboratory, European Bioinformatics Institute (EMBL-EBI), Hinxton, UK.*

<sup>2</sup>*Joint Biosecurity Center JBC*

<sup>3</sup>*Wellcome Sanger Institute, Hinxton, UK*

<sup>4</sup>*The Francis Crick Institute, London, UK*

<sup>5</sup>*Public Health England PHE*

<sup>6</sup>*London School of Hygiene & Tropical Medicine, London, UK*

<sup>7</sup>*The Big Data Institute, Nuffield Department of Medicine, University of Oxford, UK*

<sup>8</sup><https://www.sanger.ac.uk/project/wellcome-sanger-institute-covid-19-surveillance-team/>

<sup>9</sup>*Full list of consortium names and affiliations are in the Appendix*

<sup>10</sup>*MRC Centre for Global Infectious Disease Analysis, Jameel Institute for Disease and Emergency Analytics, Imperial College London, London, UK*

<sup>11</sup>*Guy's and St Thomas' NHS Foundation Trust, UK*

<sup>12</sup>*Division for AI in Oncology, German Cancer Research Centre dkfz, Heidelberg, Germany*

*\*to whom correspondence should be addressed*

## Abstract

The evolution of the SARS-CoV-2 pandemic continuously produces new variants, which warrant timely epidemiological characterisation. Here we use the dense genomic surveillance generated by the COVID-19 Genomics UK Consortium to reconstruct the dynamics of 71 different lineages in each of 315 English local authorities between September 2020 and June 2021. This analysis reveals a series of sub-epidemics that peaked in the early autumn of 2020, followed by a jump in transmissibility of the B.1.1.7/Alpha lineage. Alpha grew when other lineages declined during the second national lockdown and regionally tiered restrictions between November and December 2020. A third more stringent national lockdown suppressed Alpha and eliminated nearly all other lineages in early 2021. However, a series of variants (mostly containing the spike E484K mutation) defied these trends and persisted at moderately increasing proportions. Accounting for sustained introductions, however, indicates that their transmissibility is unlikely to have exceeded that of Alpha. Finally, B.1.617.2/Delta was repeatedly introduced to England and grew rapidly in the early summer of 2021, constituting approximately 98% of sampled SARS-CoV-2 genomes on June 26.



# Contents

|   |                      |    |
|---|----------------------|----|
| 1 | Supplementary Note 1 | 3  |
| 2 | Supplementary Note 2 | 11 |
| 3 | Supplementary Note 3 | 92 |

# 1 Supplementary Note 1

Supplementary Note 1 Fig. 1: **Observed proportions of sequenced SARS-Cov2 lineages in 315 LTLA in England.** The titles in each tile refer to LTLA look up codes (Supplementary Note 3) and colours indicate major SARS-CoV-2 lineages (blue: B.1, purple: B.1.1, green: B.1.177, red: B.1.1.7 (Alpha), orange: other VOC/VUI, brown: B.1.617.2 (Delta) and grey: Other (A & B)).

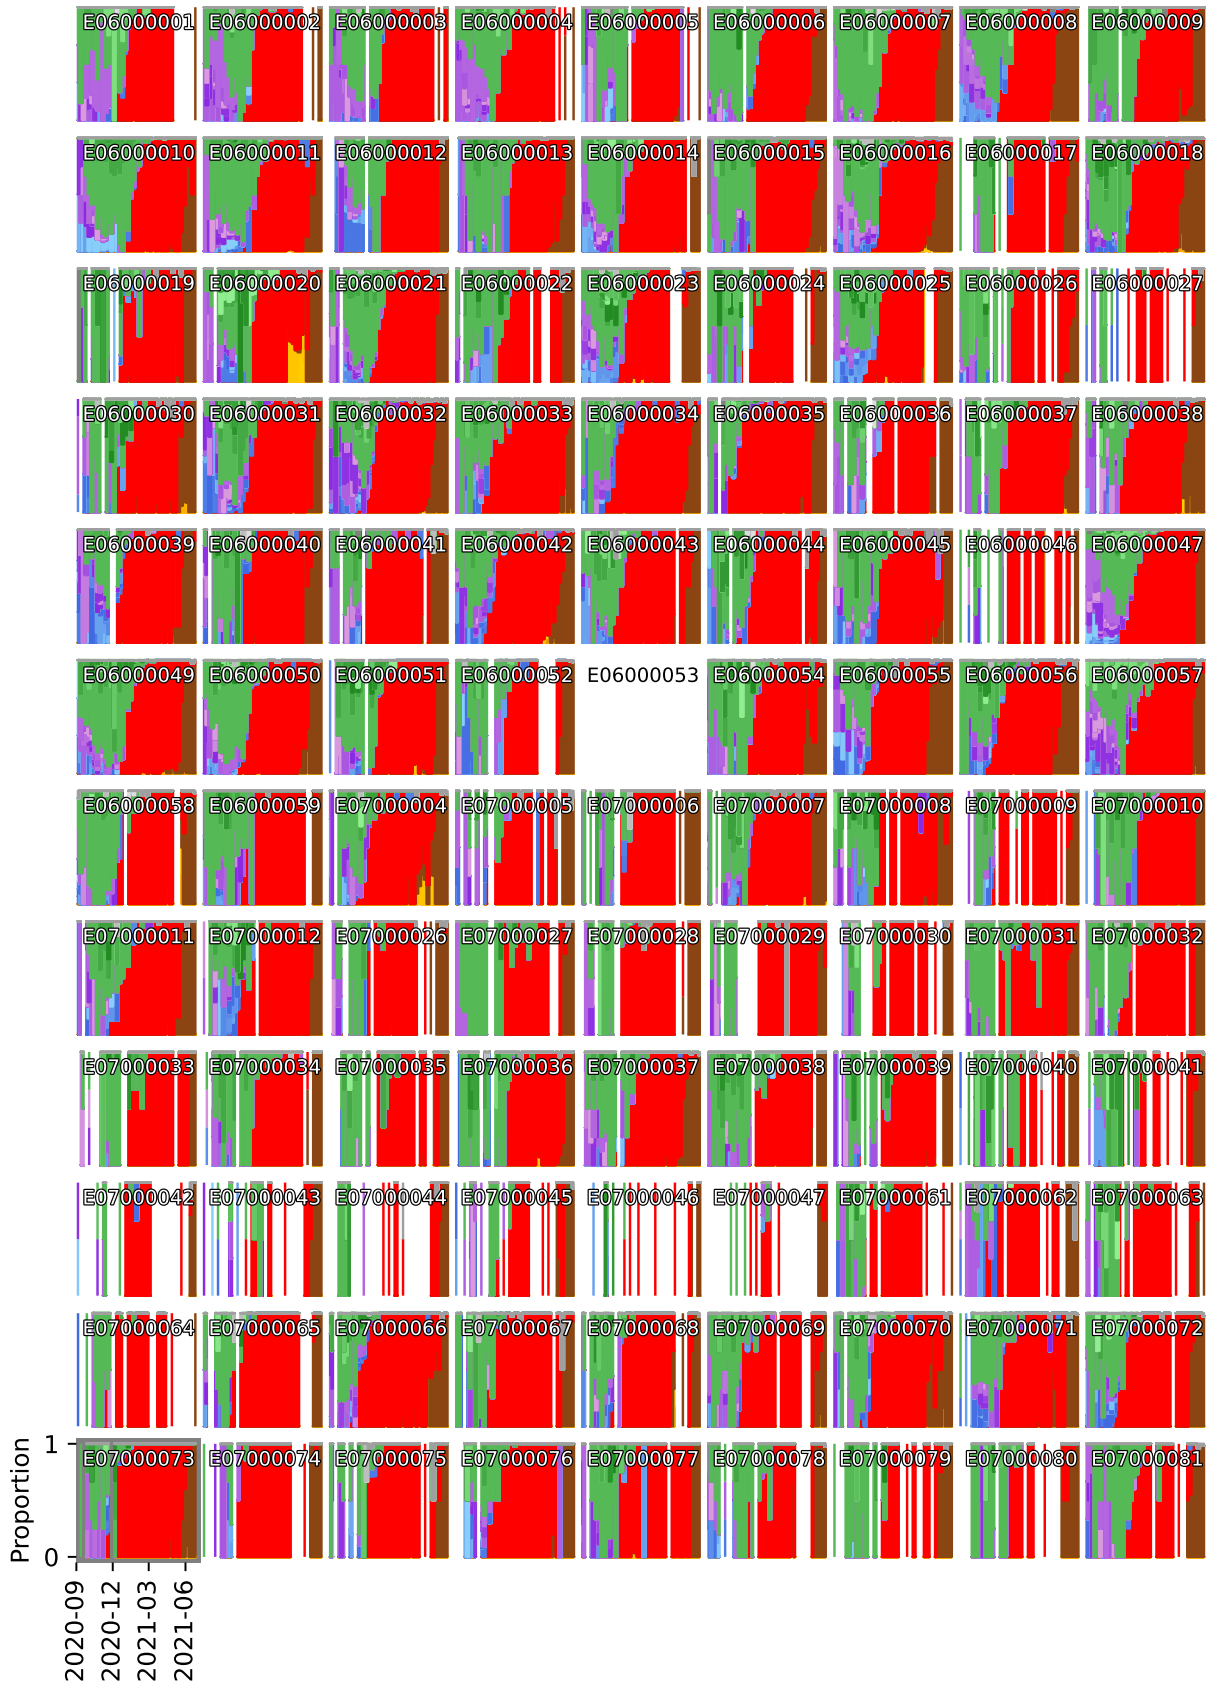

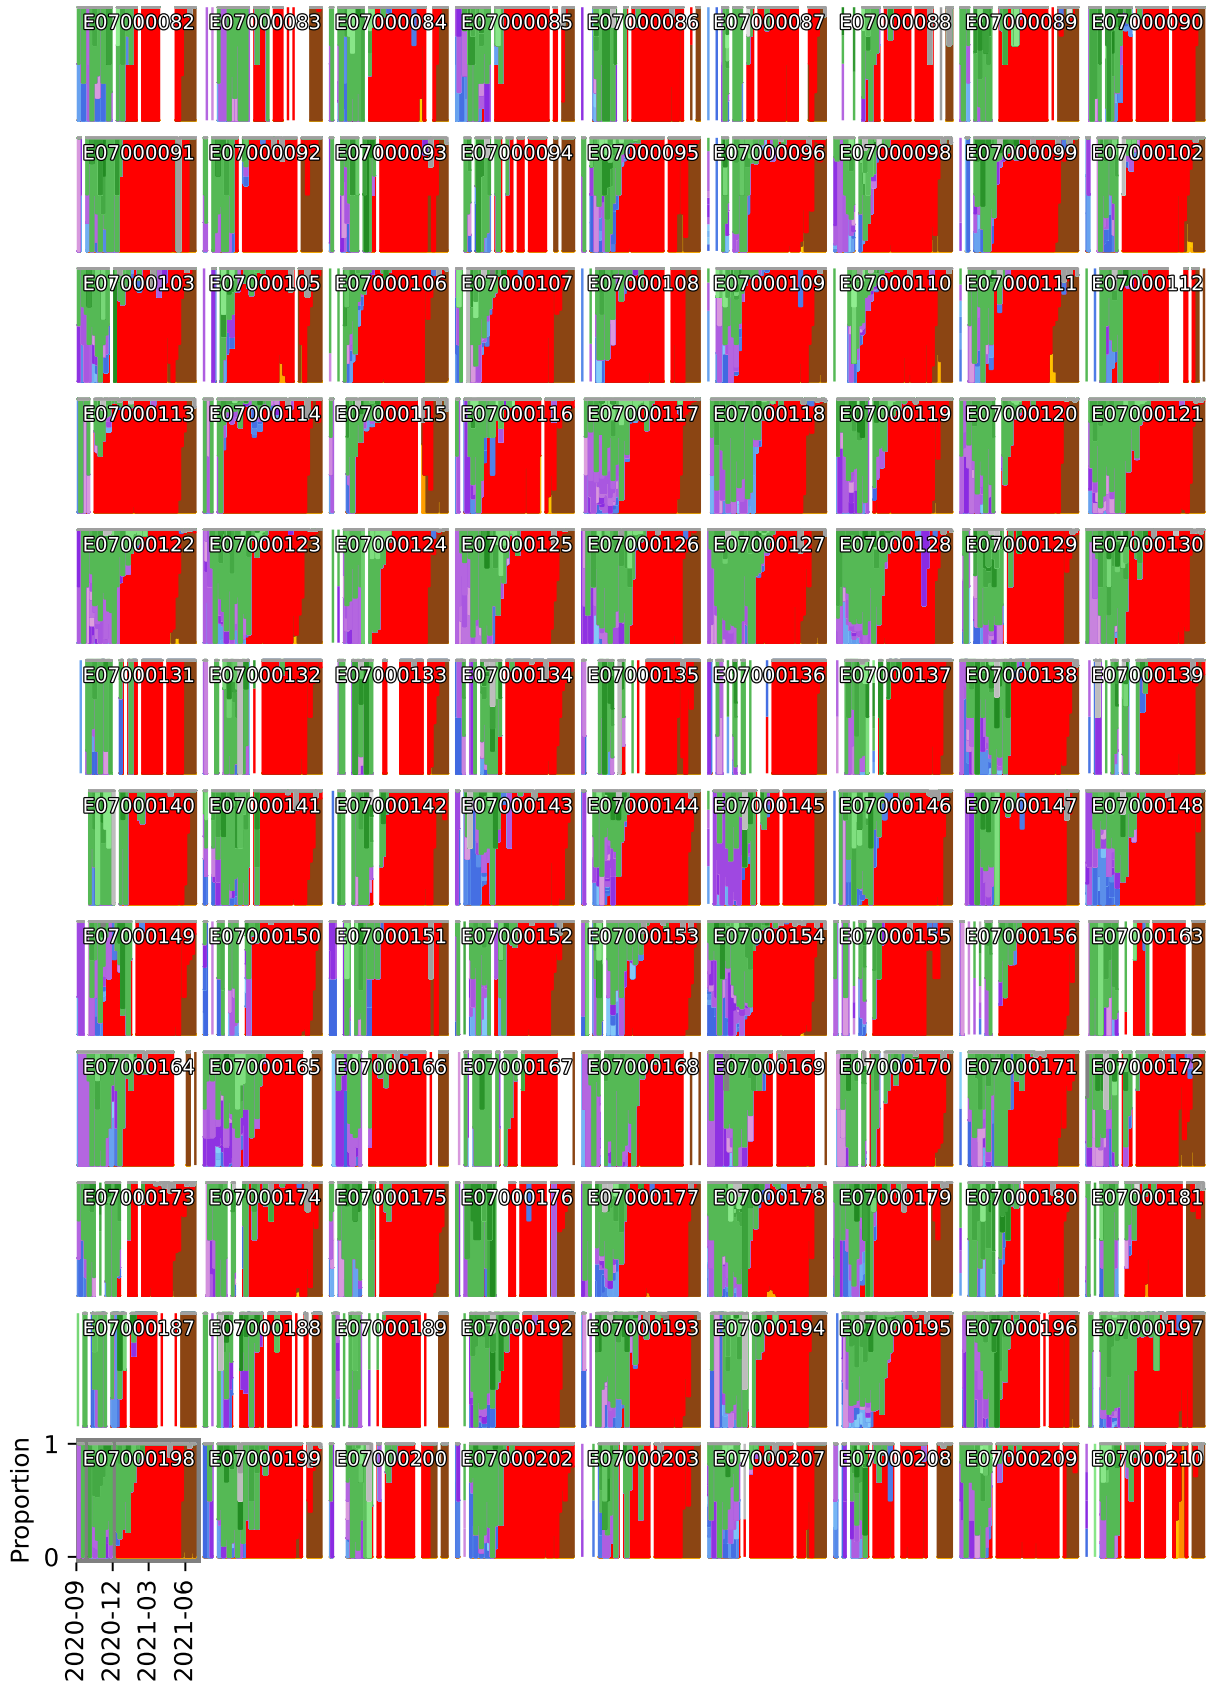

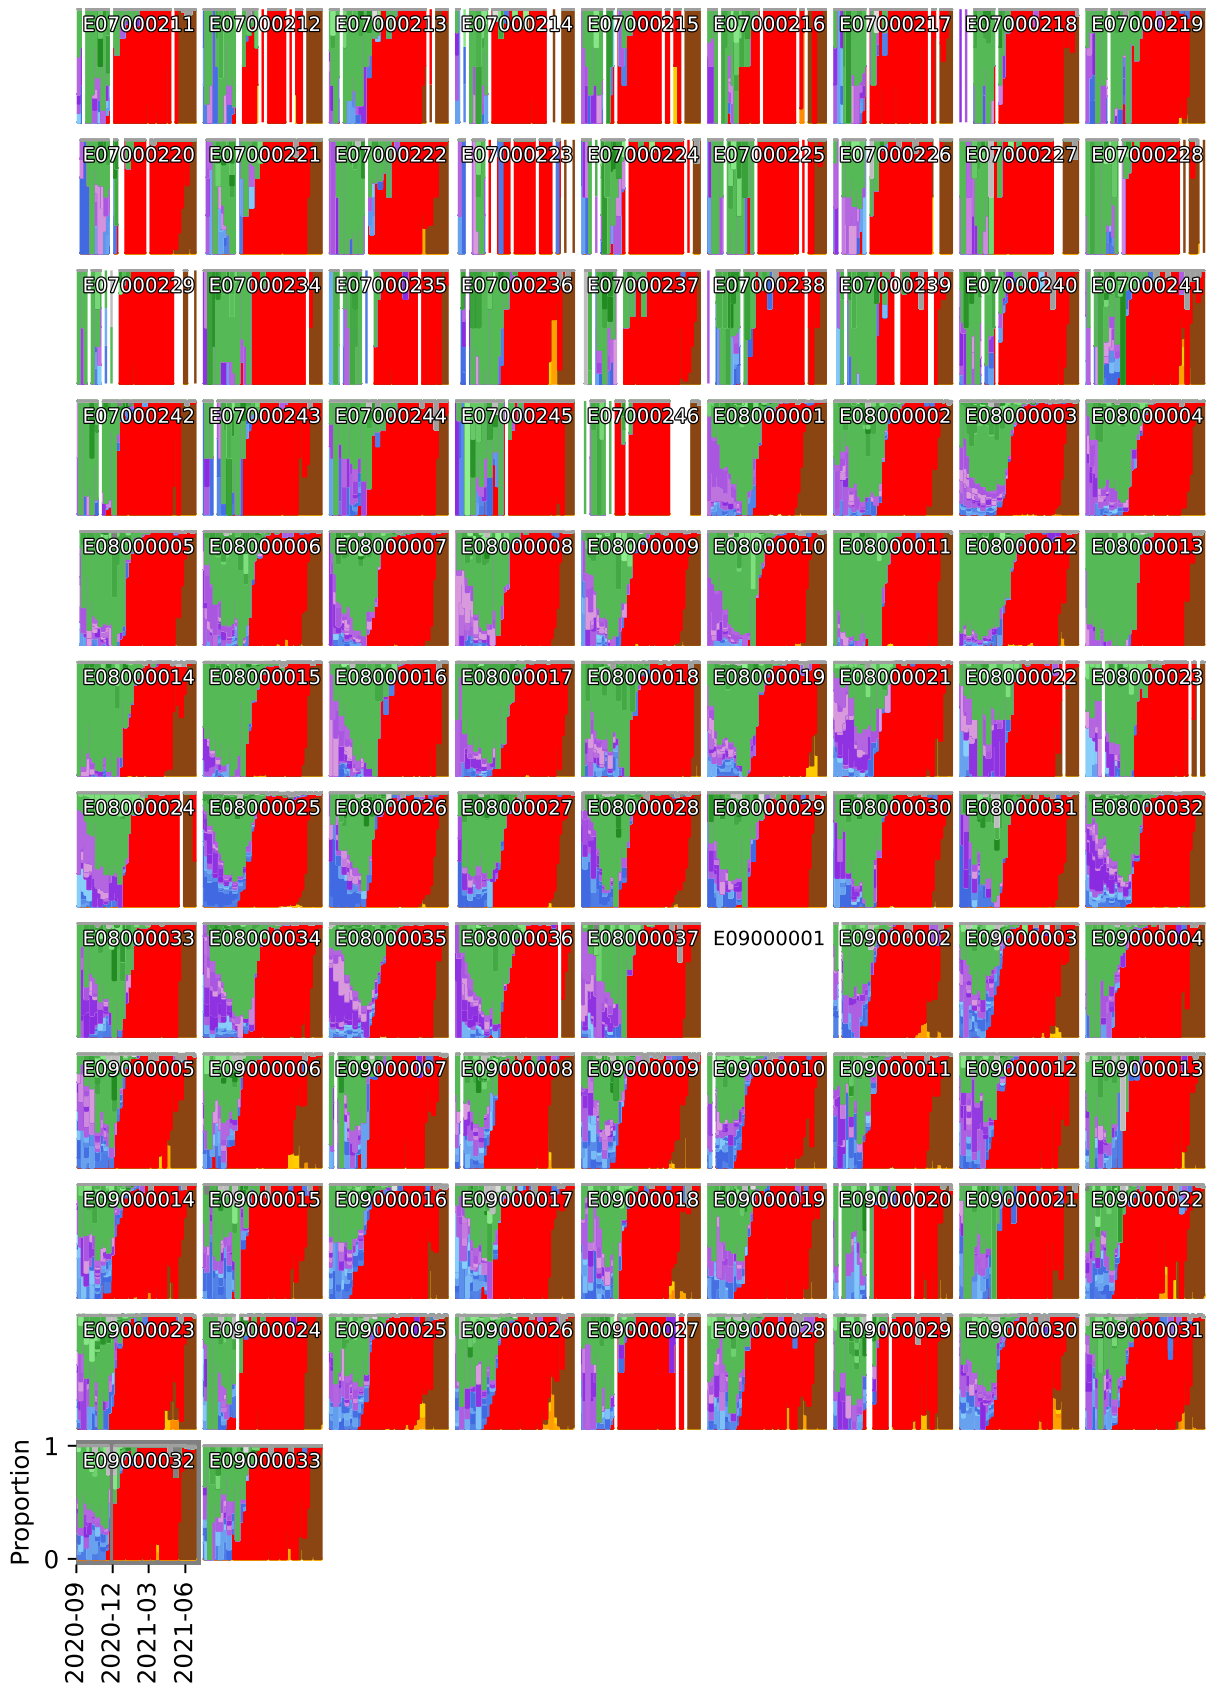

Supplementary Note 1 Fig. 2: **Modelled proportions of sequenced SARS-Cov2 lineages in 315 LTLA in England.** The titles in each tile refer to LTLA look up codes (Supplementary Note 3) and colours indicate major SARS-CoV-2 lineages (blue: B.1, purple: B.1.1, green: B.1.177, red: B.1.1.7 (Alpha), orange: other VOC/VUI, brown: B.1.617.2 (Delta) and grey: Other (A & B)).

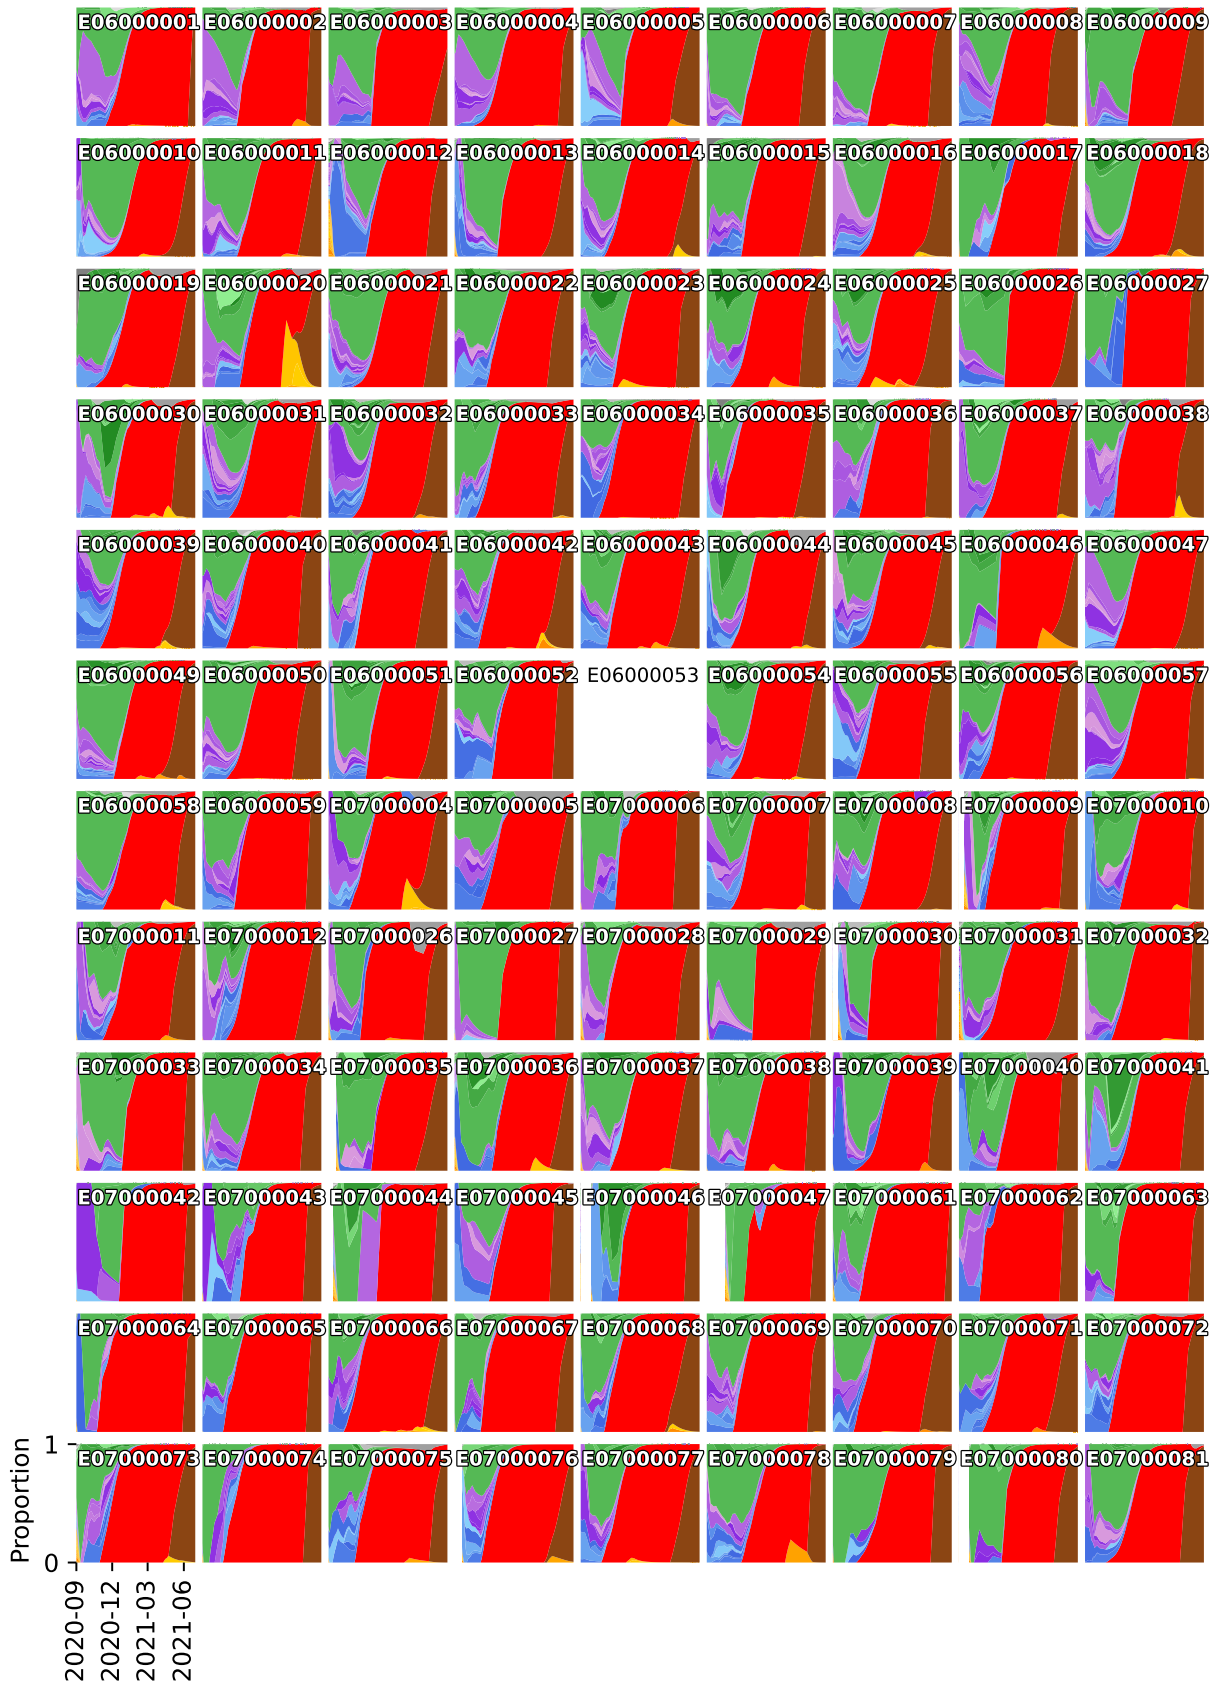

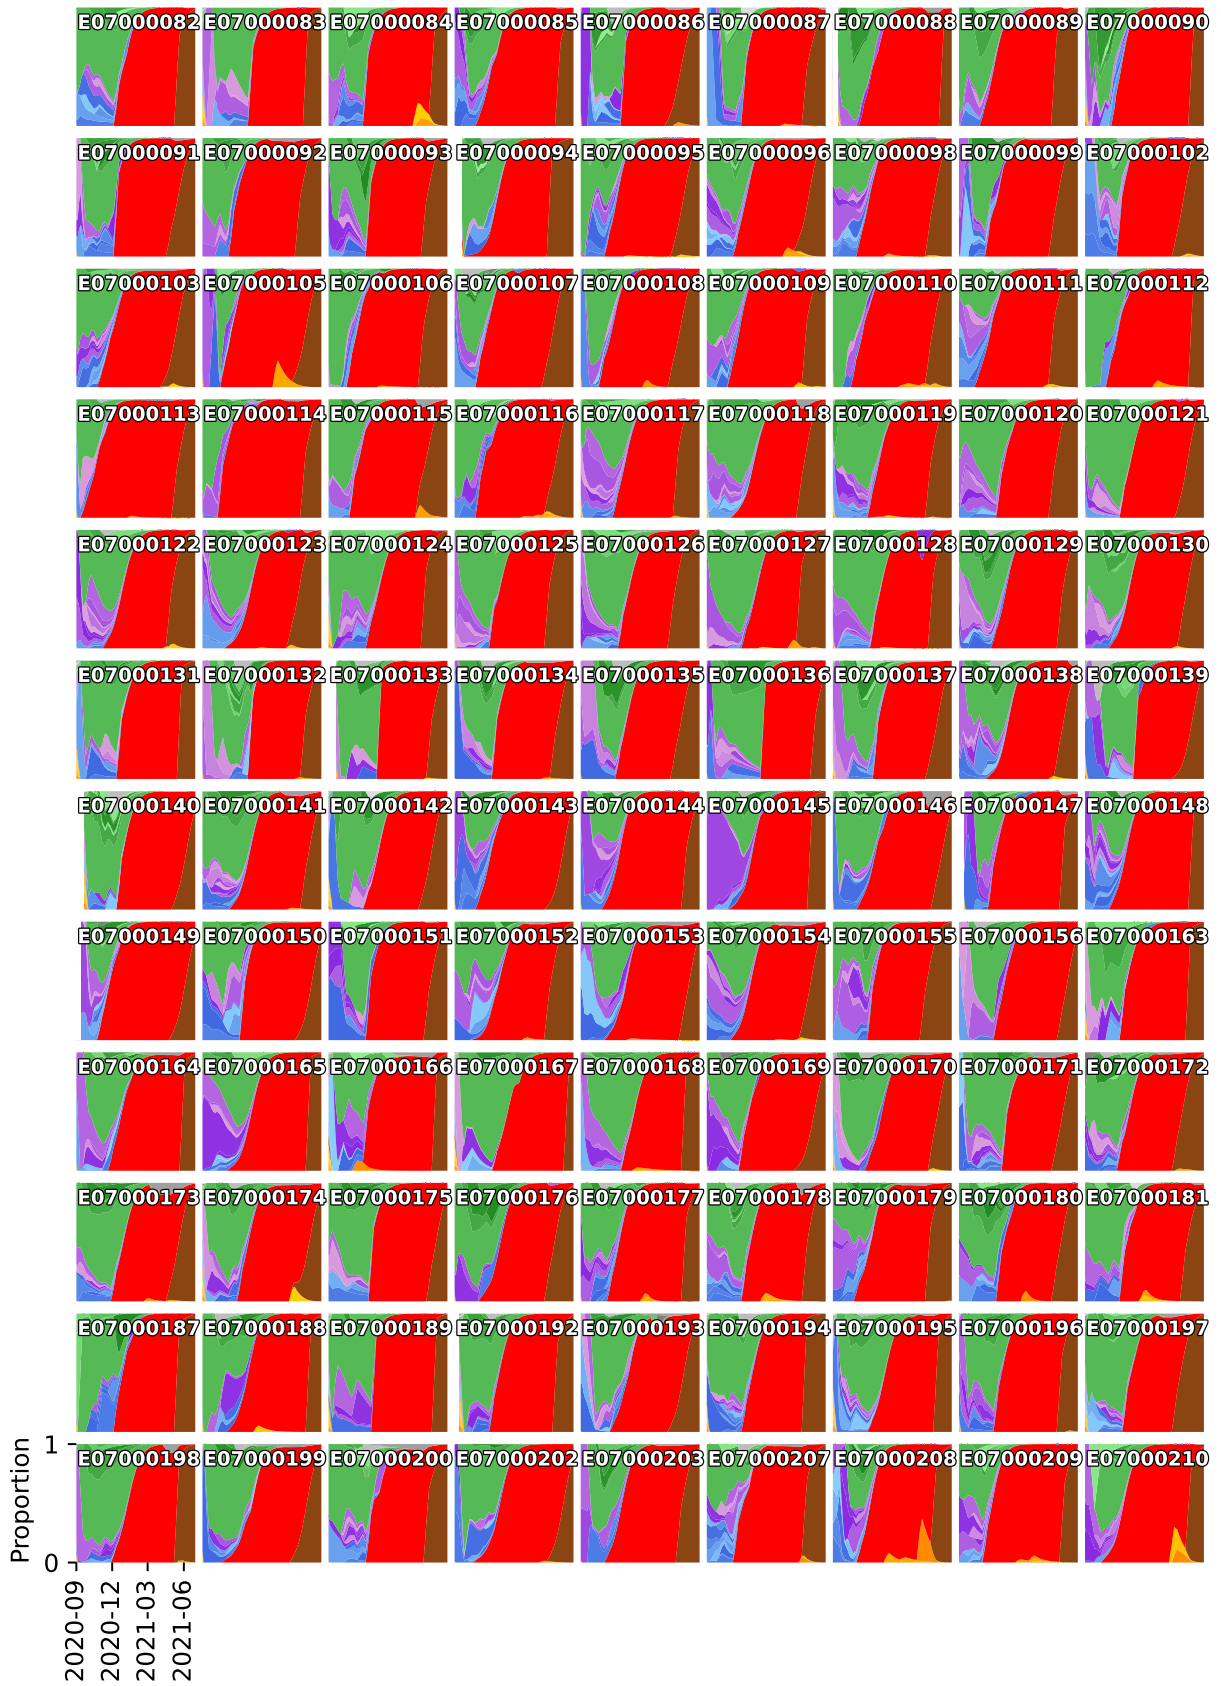



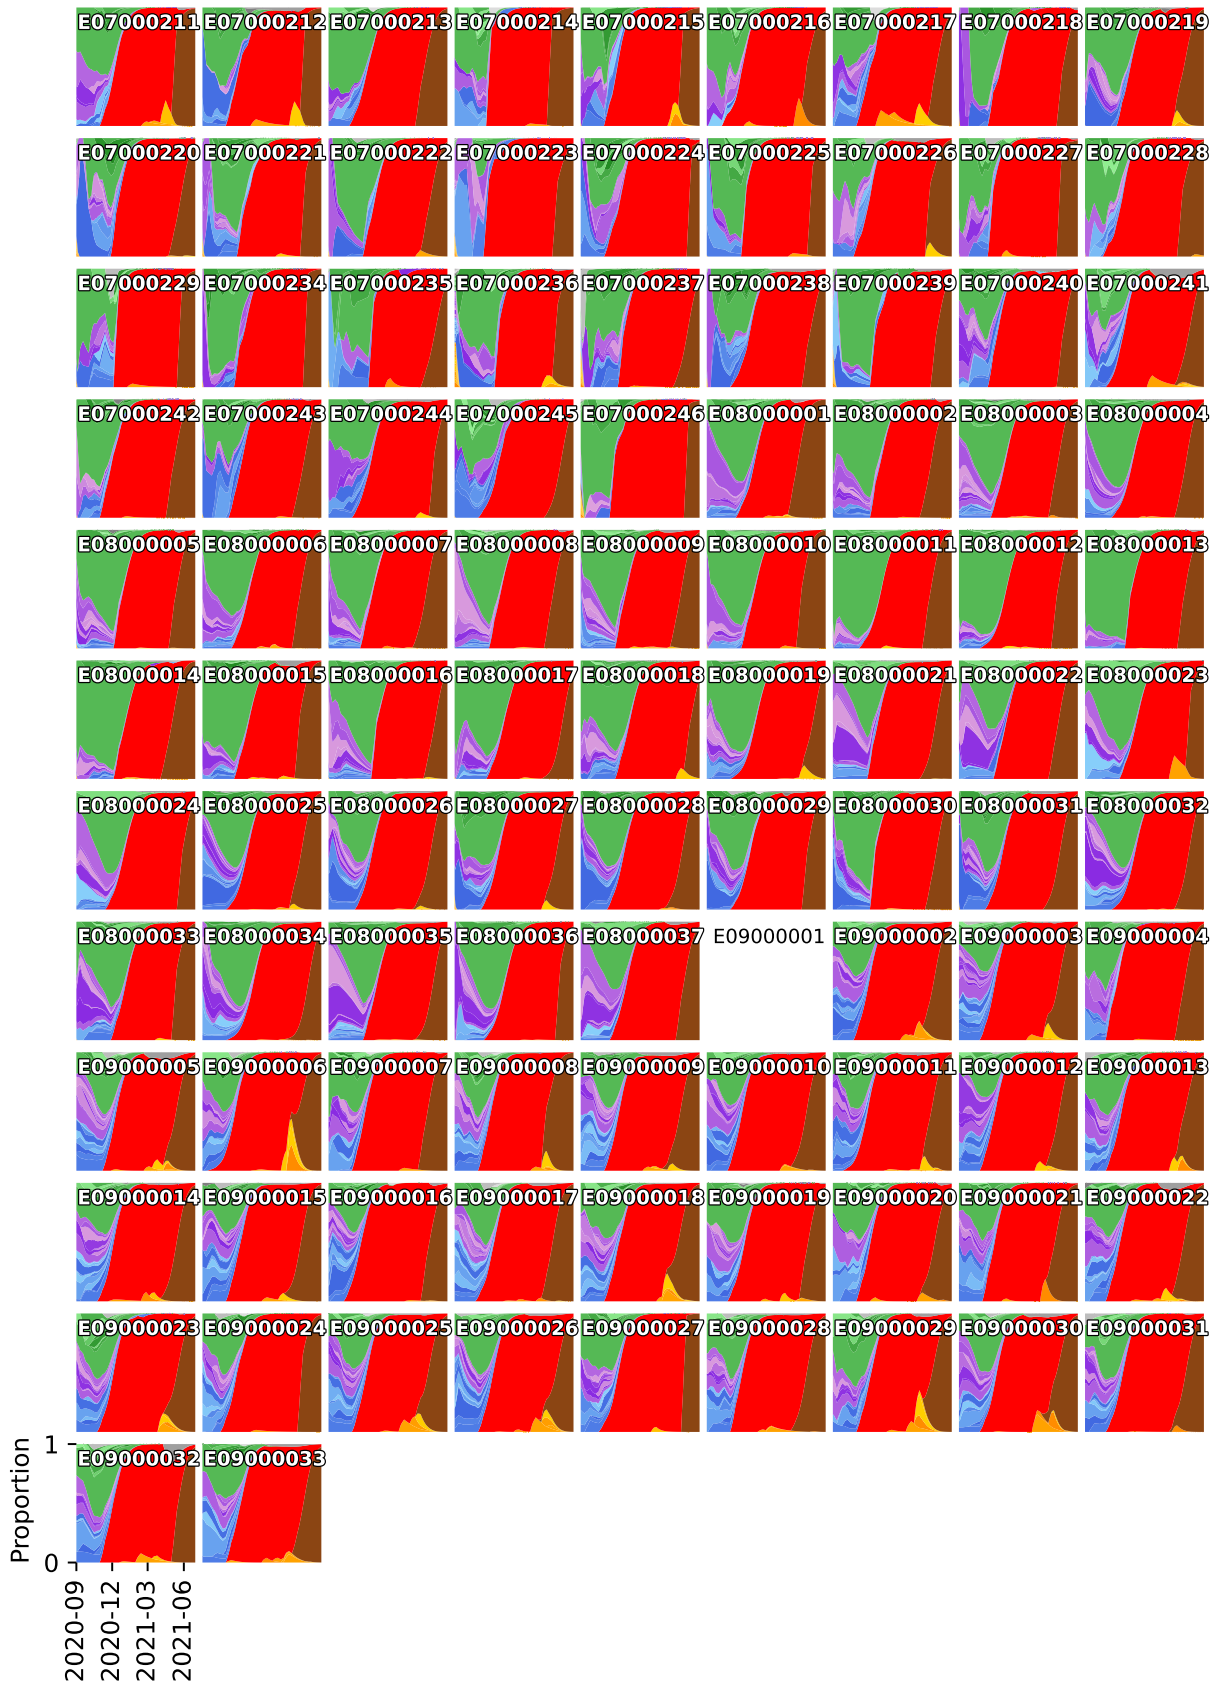

## 2 Supplementary Note 2

Supplementary Note 2 Fig. 1: **Spatiotemporal model of 71 SARS-CoV-2 lineages in 315 English LTLAs between September 2020 and June 2021.** Upper panel: Total and relative lineage-specific incidence of B.1.177, B.1.1.7 (Alpha), B.1.617.2 (Delta) and prevalent VUI/VOC (if present). Middle panel: Modelled proportions of B.1.177, B.1.1.7 (Alpha), B.1.617.2 (Delta) and prevalent VUI/VOC (if present). Bottom panel: Local lineage-specific  $R_t$  values for B.1.177, B.1.1.7 (Alpha), B.1.617.2 (Delta) and prevalent VUI/VOC (if present) and the average  $R_t$  value (growth per 5.1d) of all other lineages in the same periods. In a small number of LTLAs (Redcar and Cleveland, Southampton, County Durham, Cheshire West and Chester, Cornwall, Bournemouth, Erewash, Stockport) we noted very large  $R_t$  values at around the time of the introduction of the delta variant. These are more likely reflections of stochastic introduction events at times of very low incidence, rather than sustained transmission.

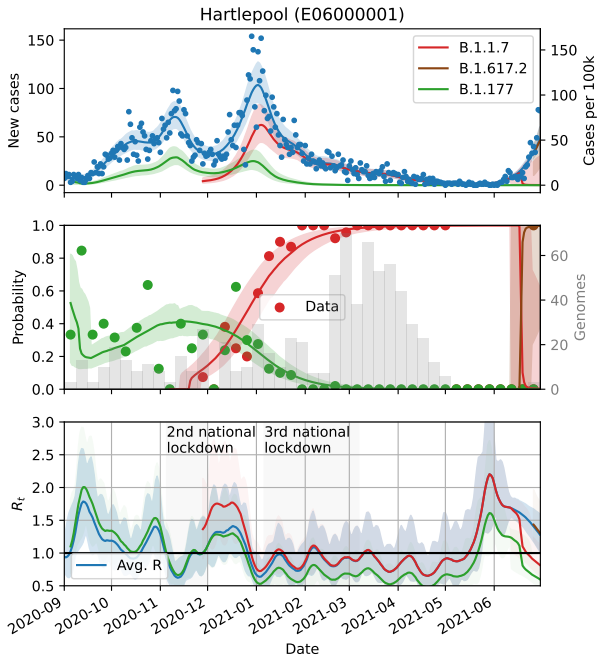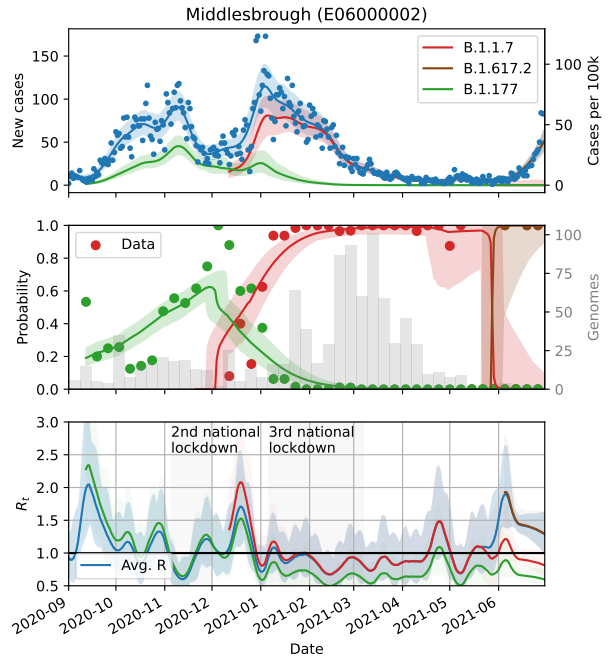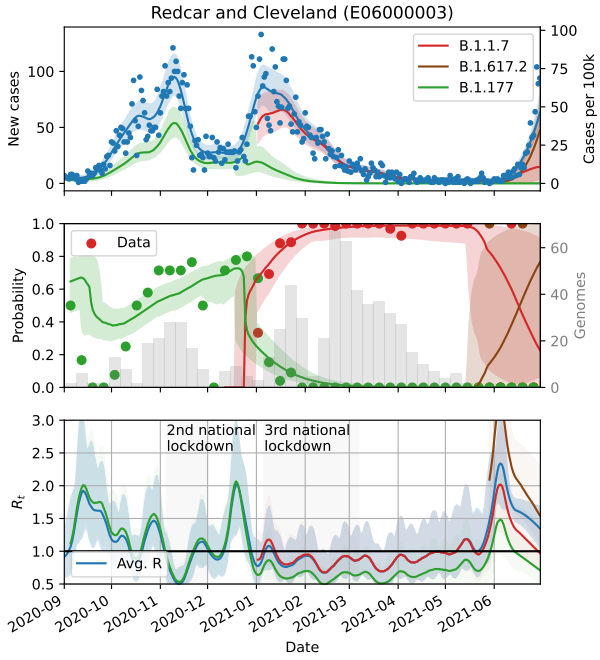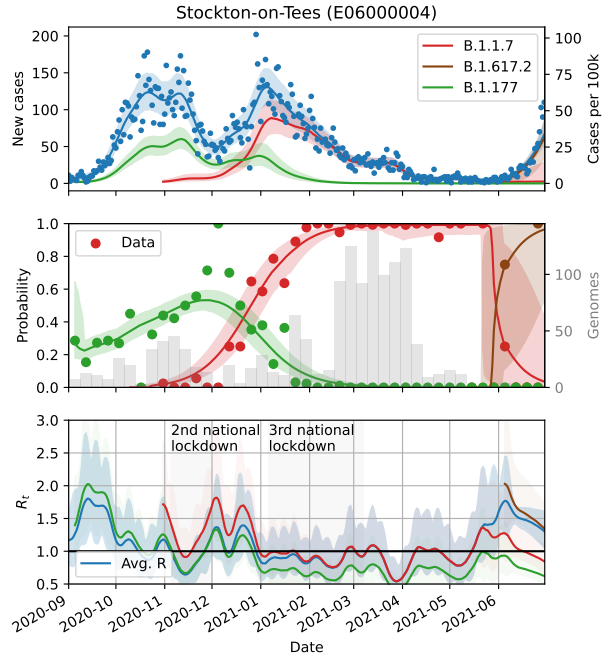

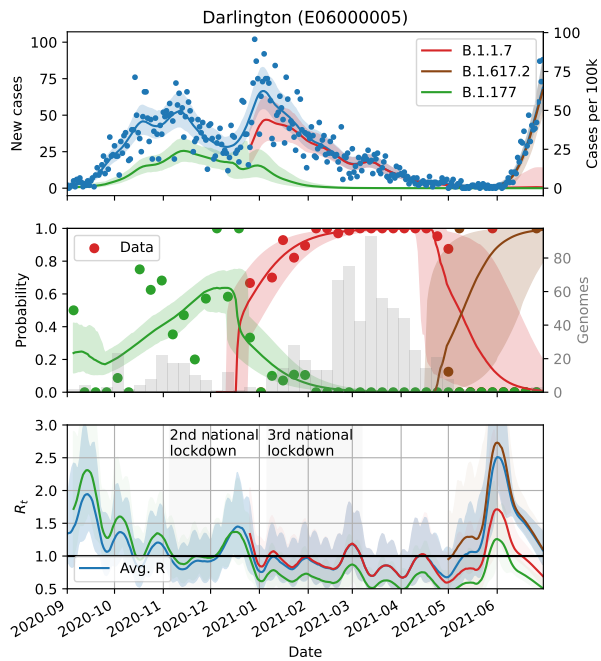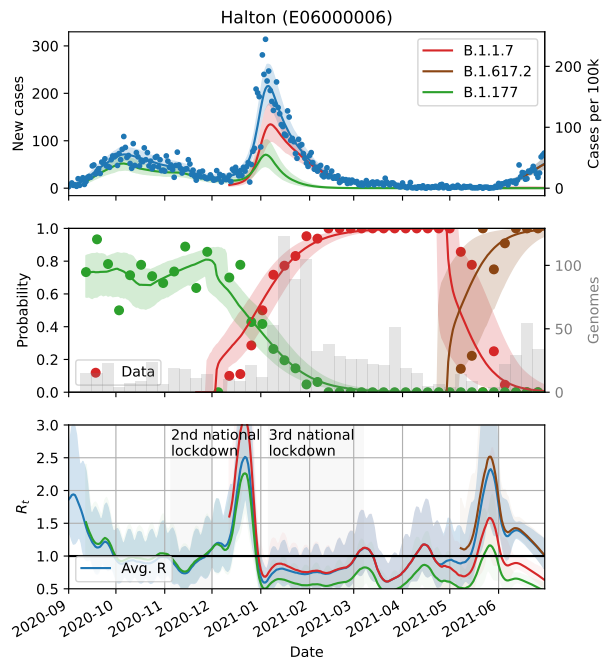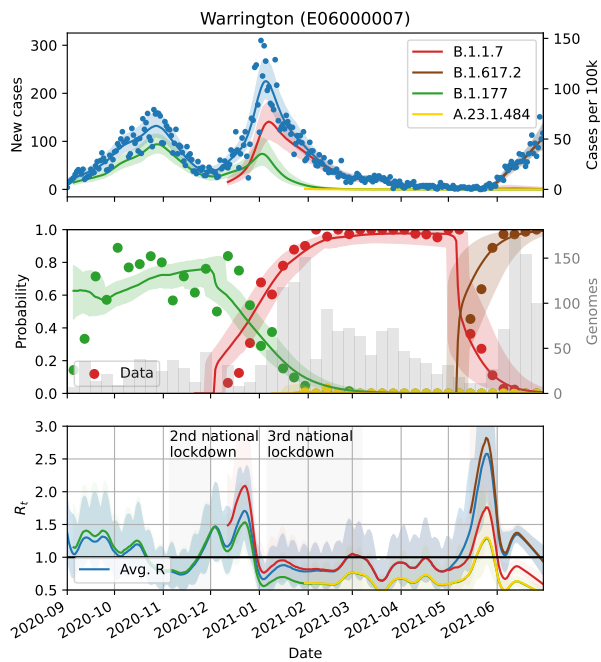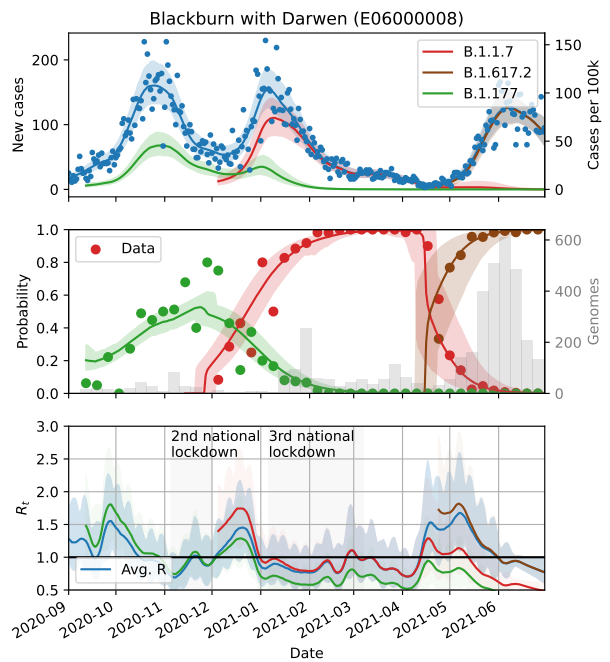

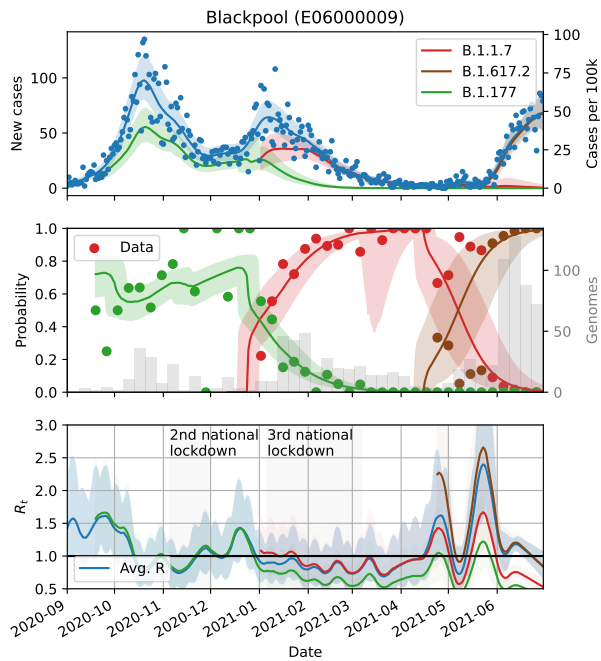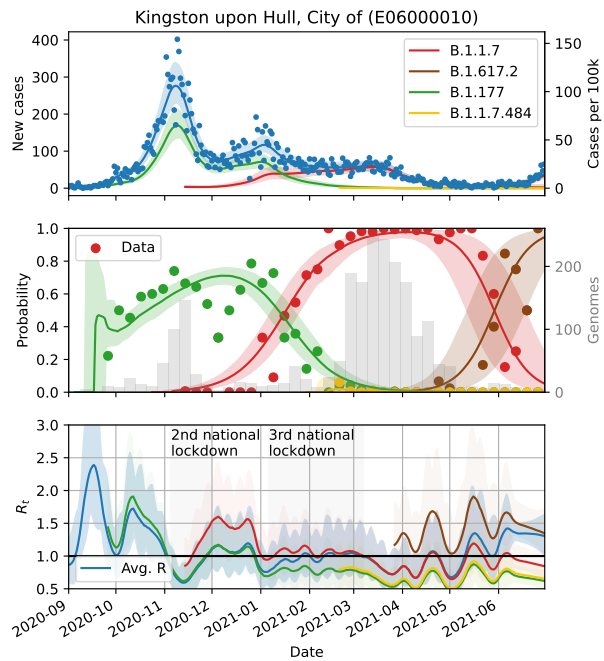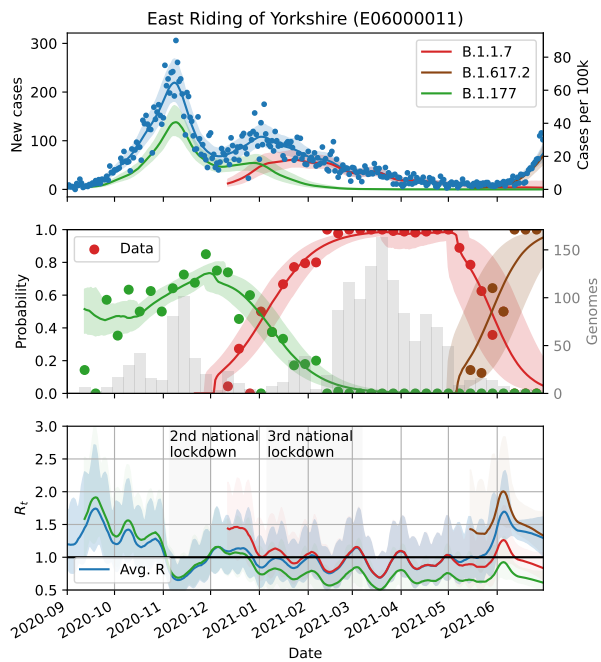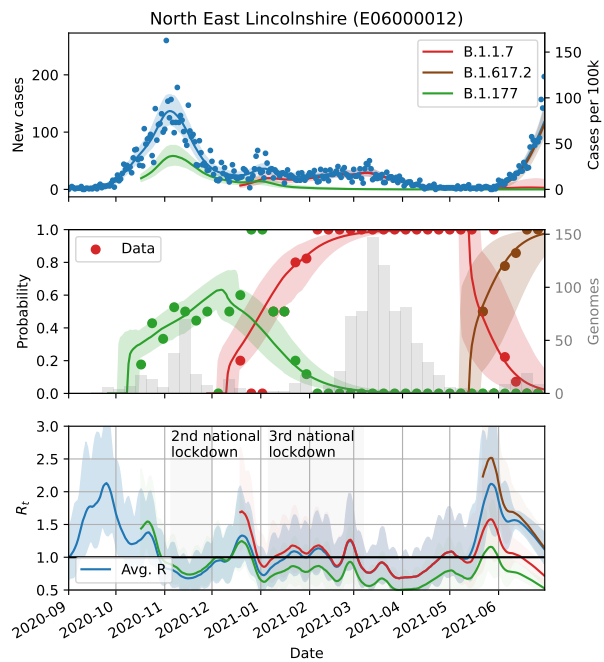

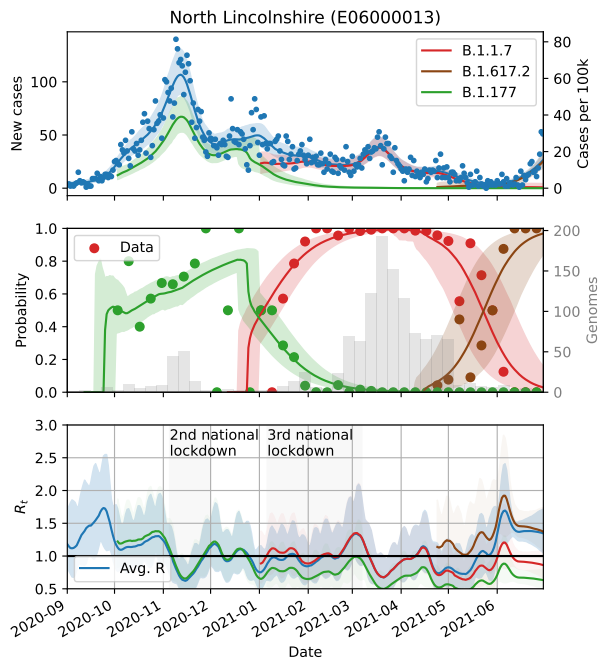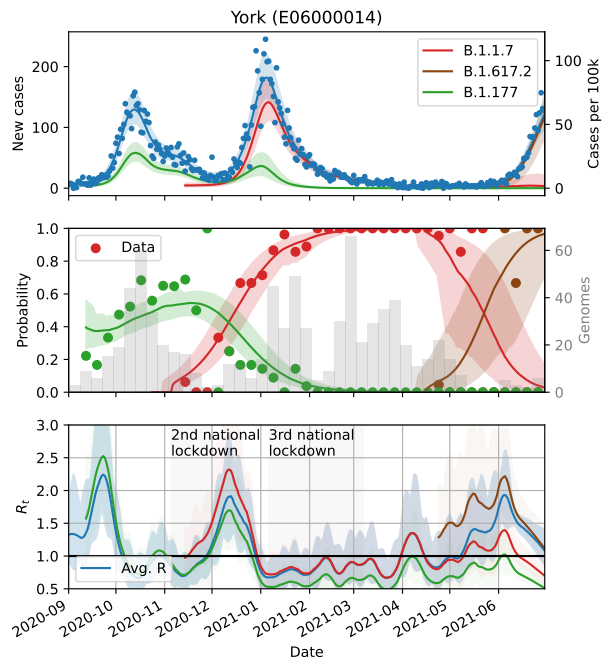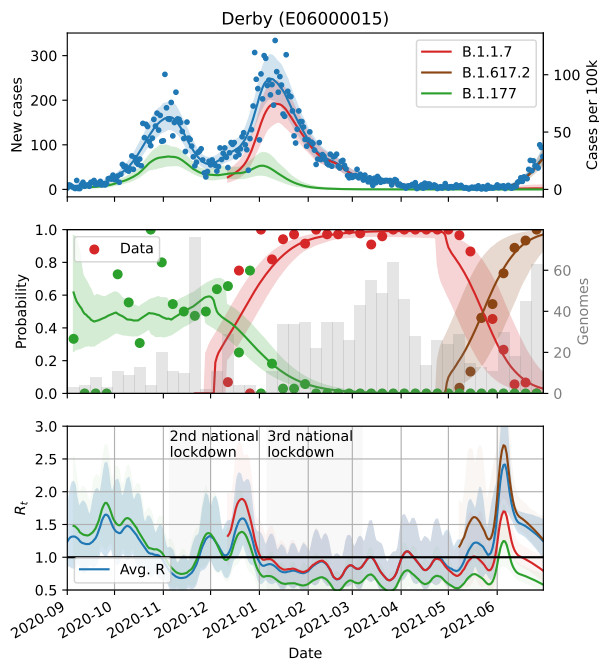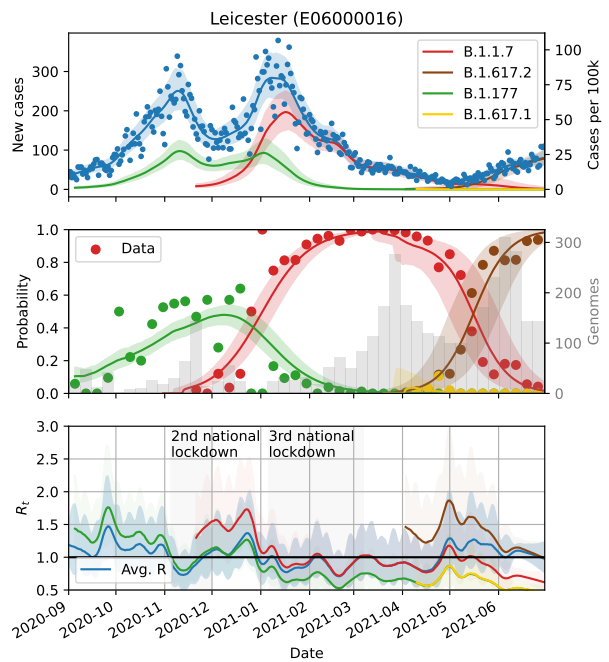



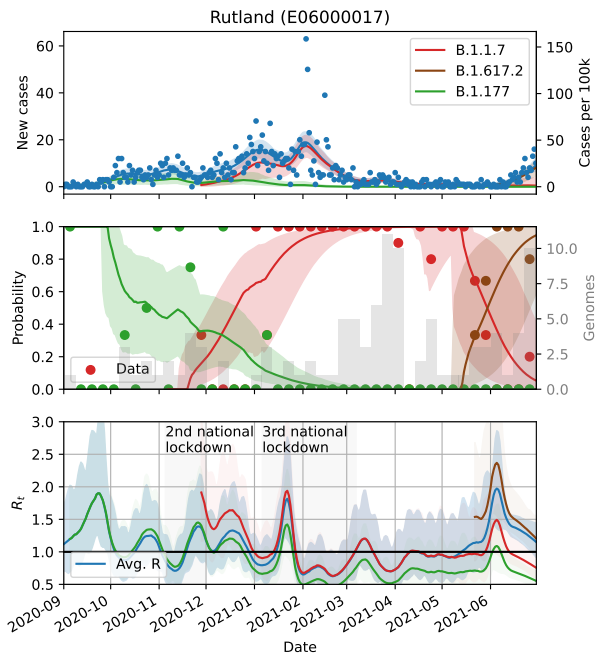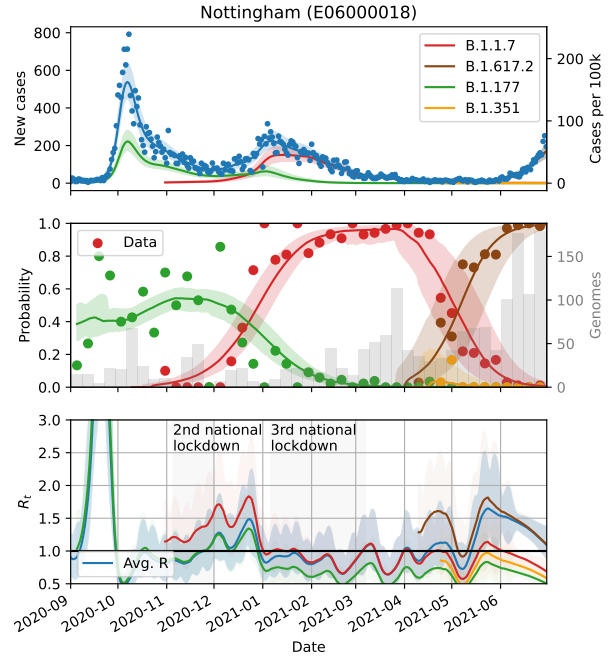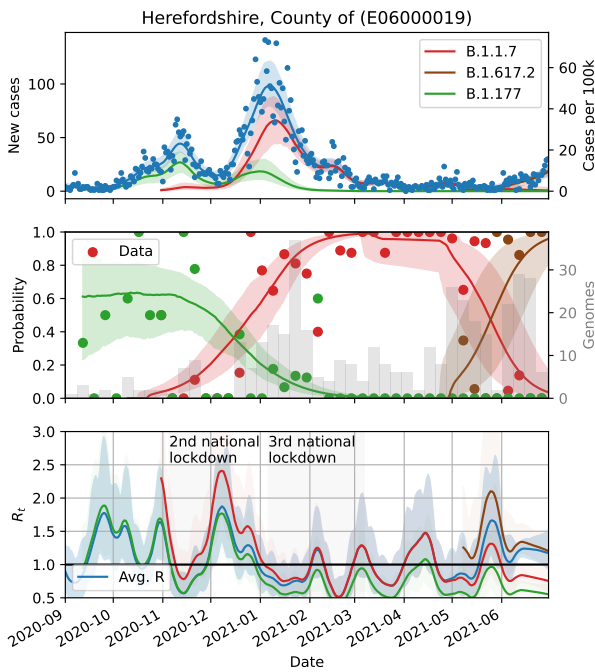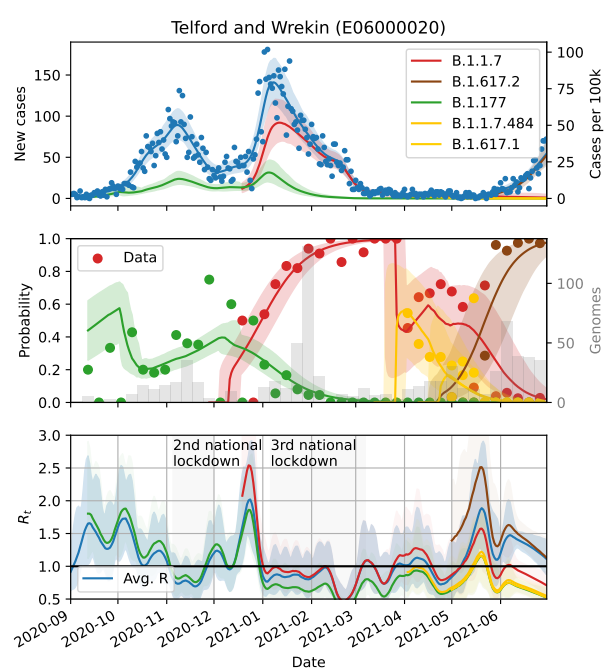

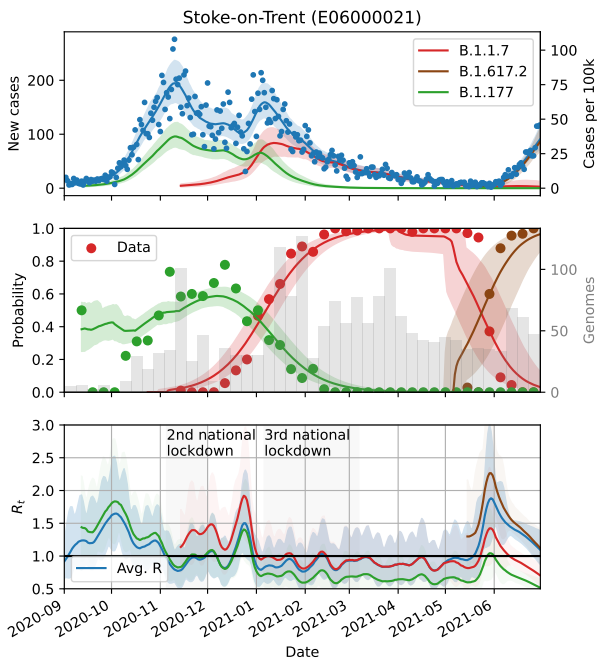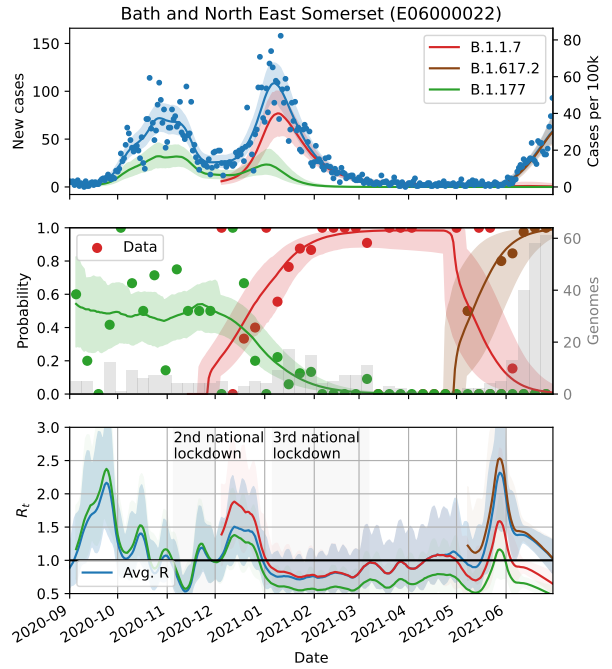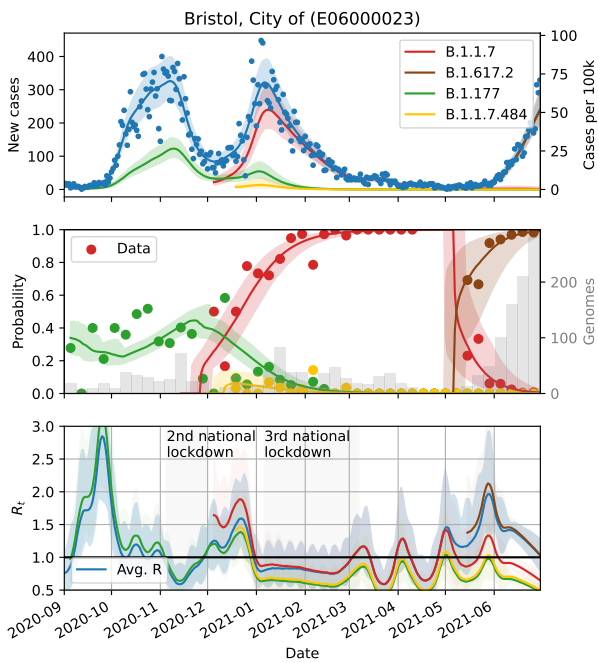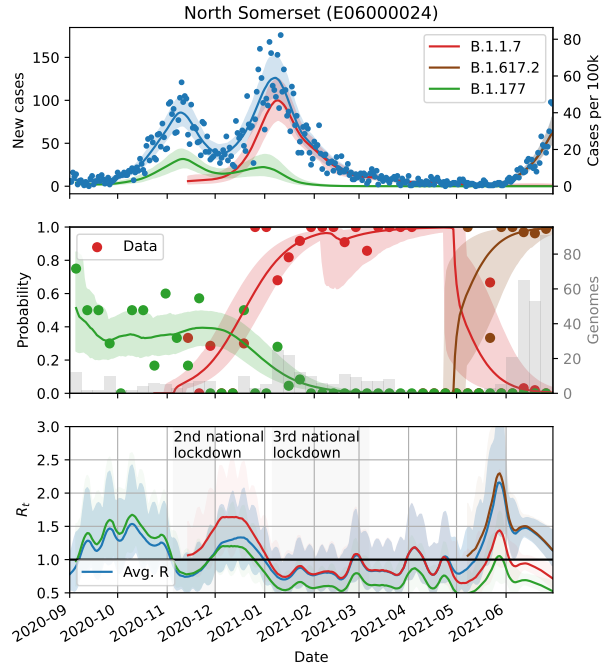



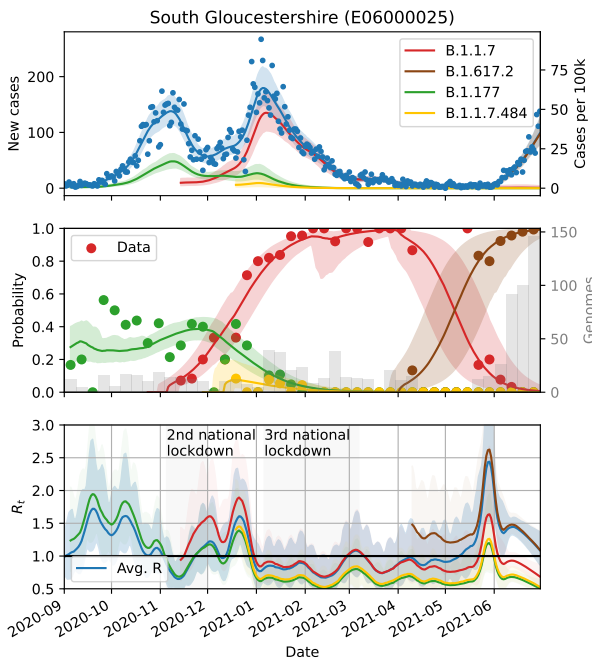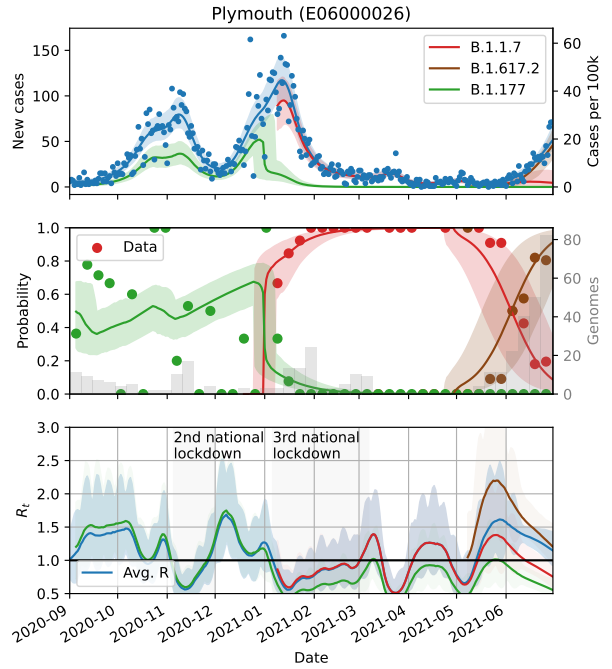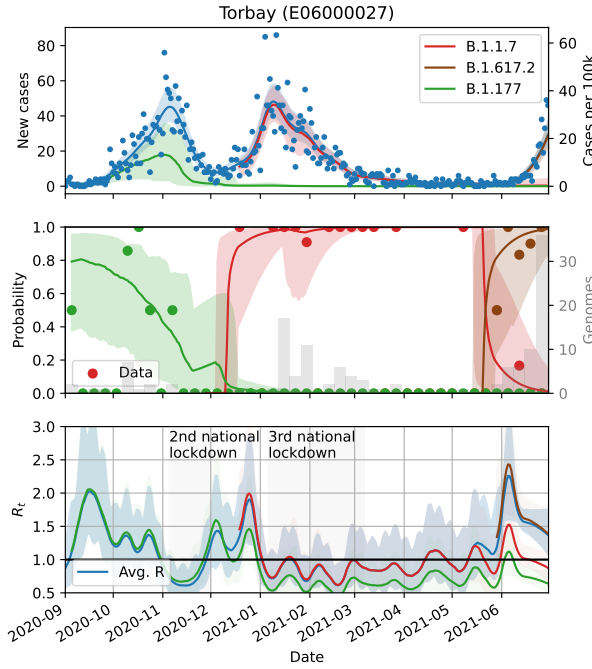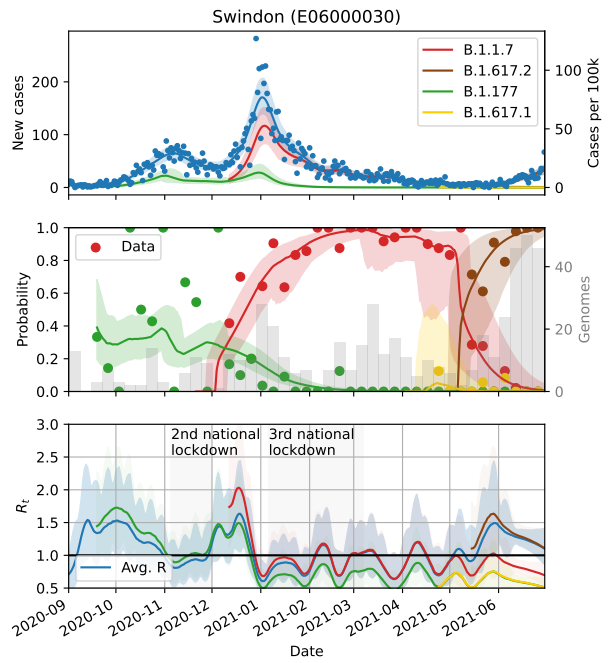

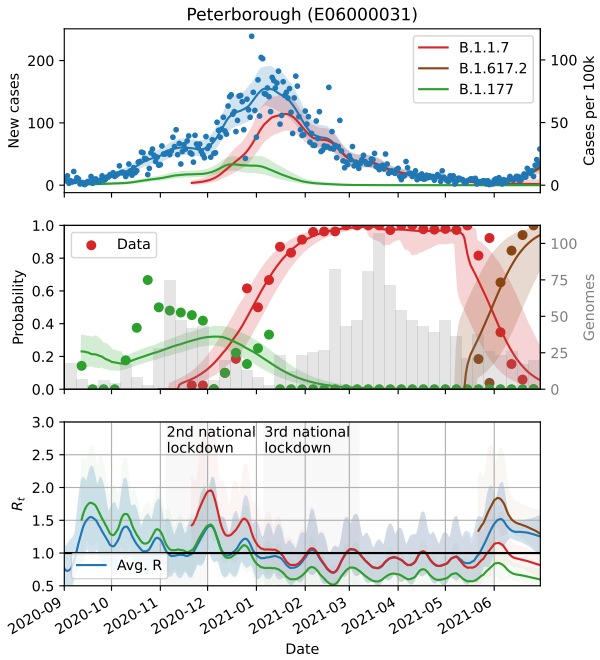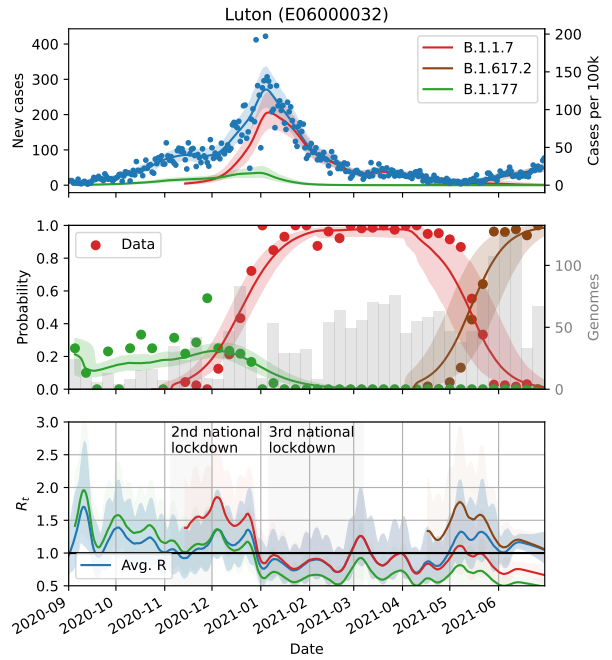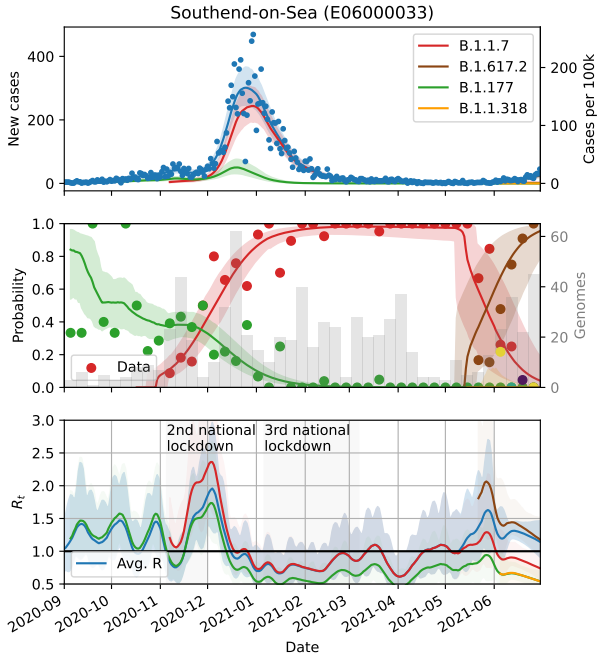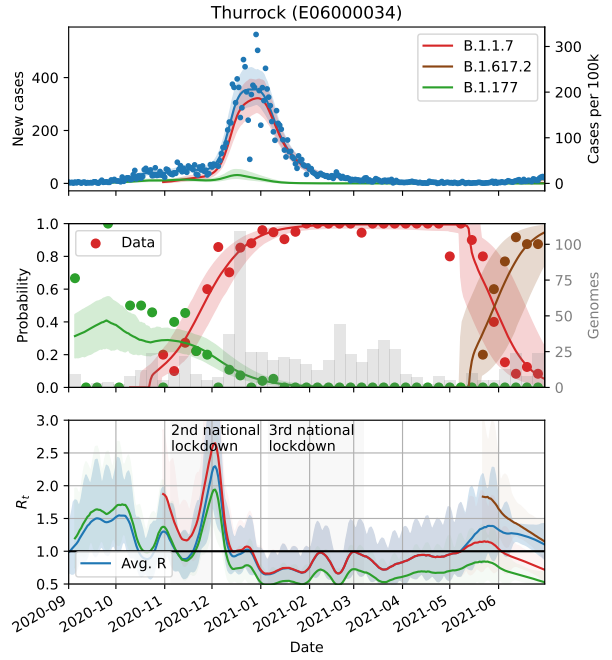

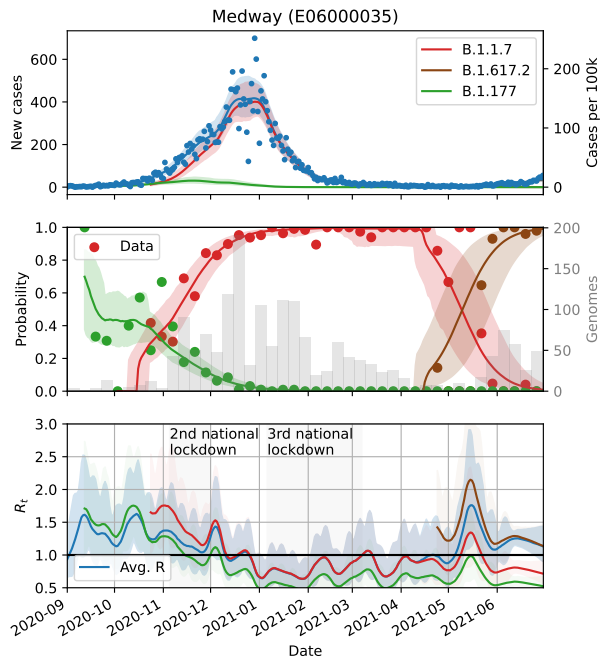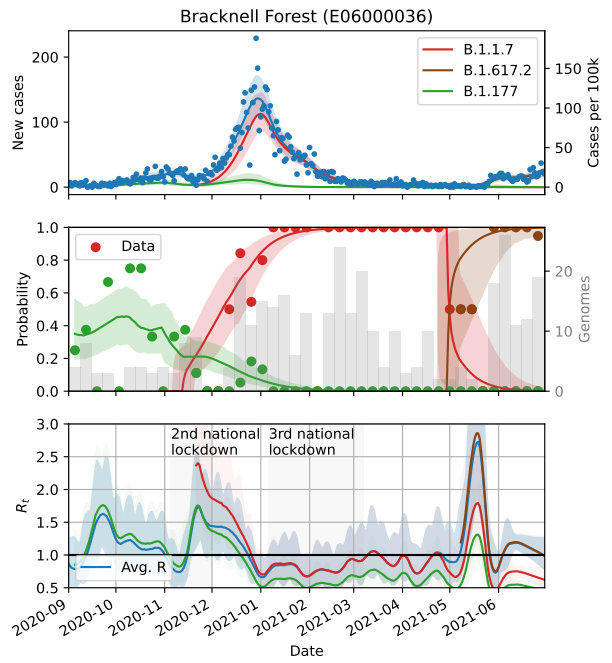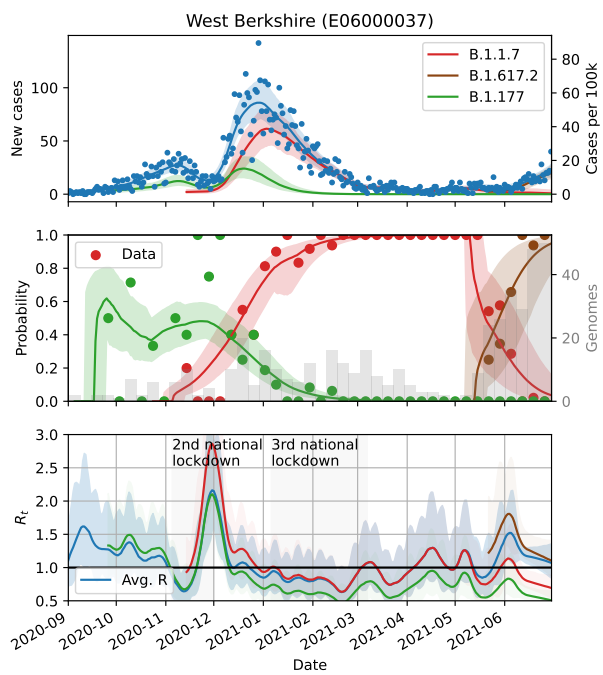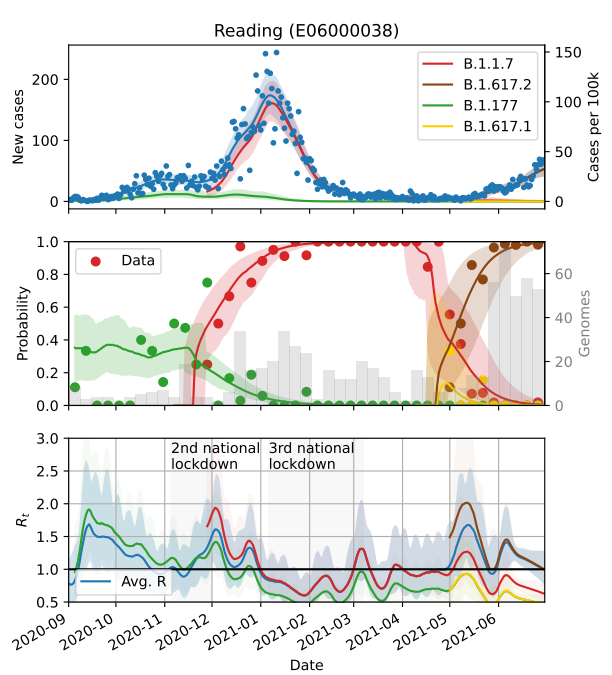

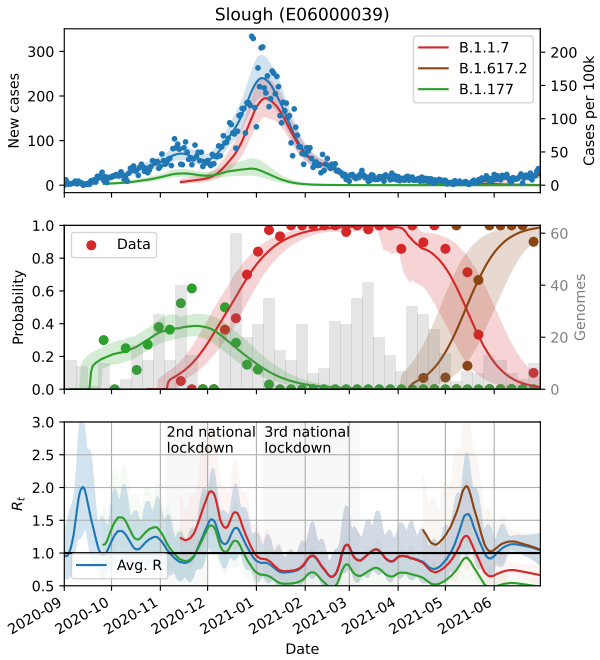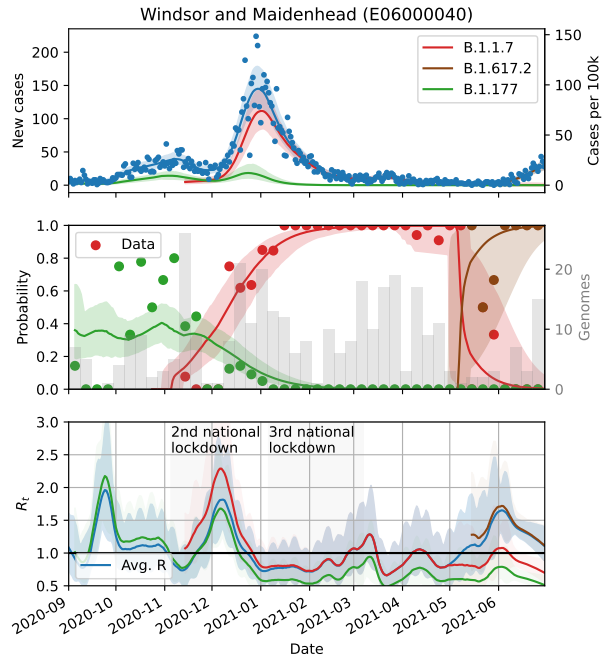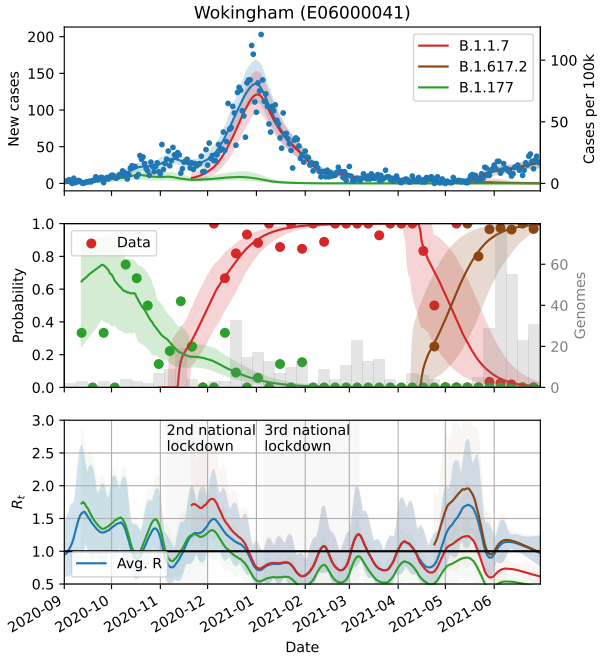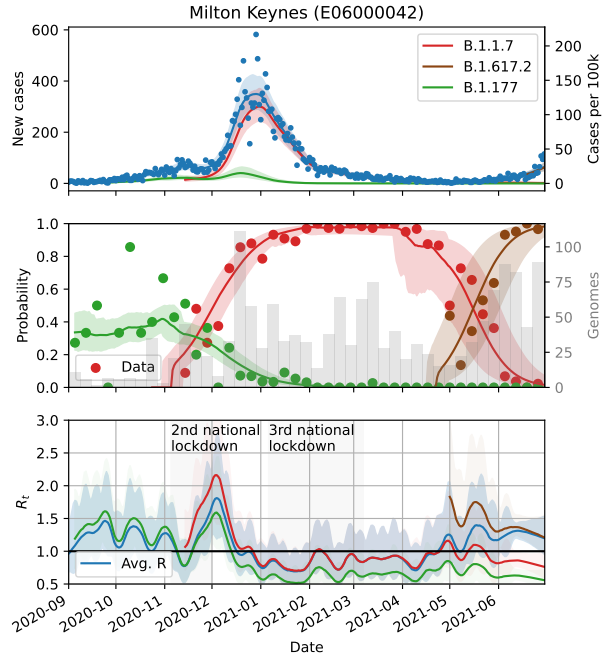

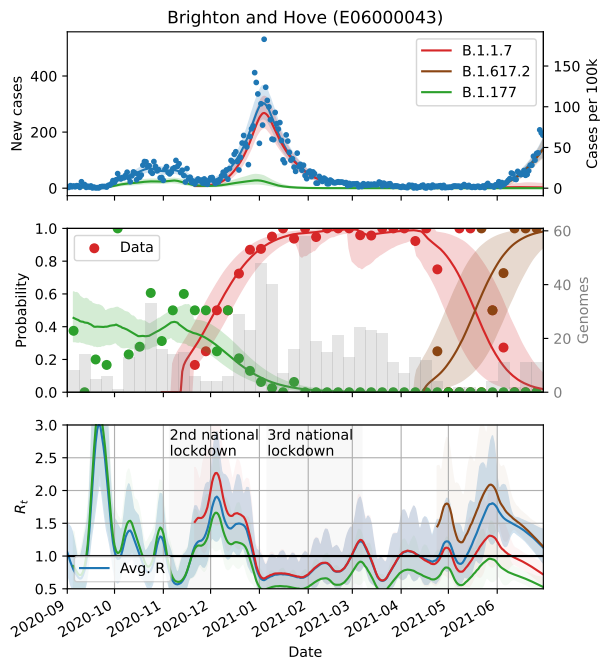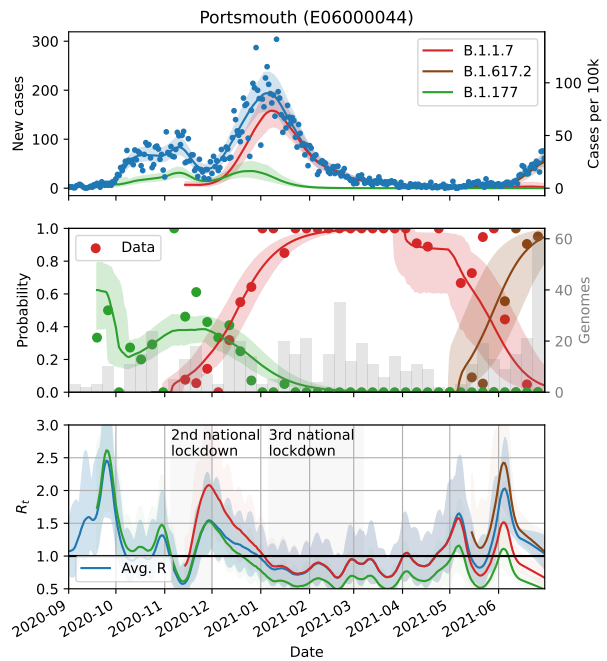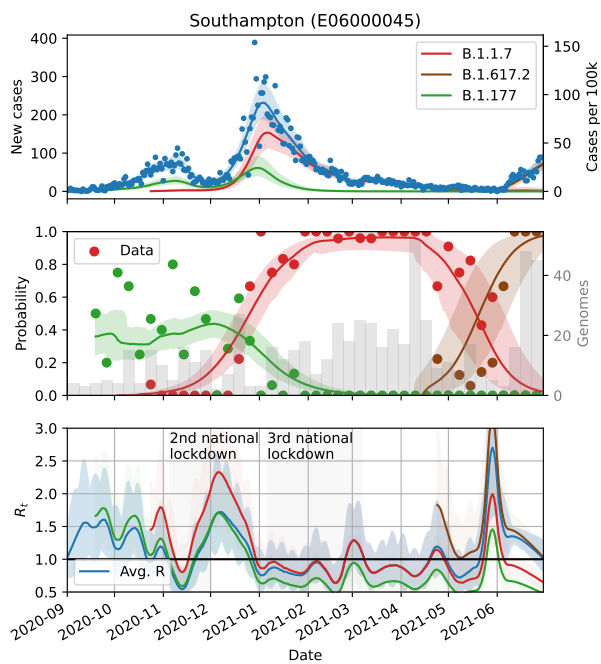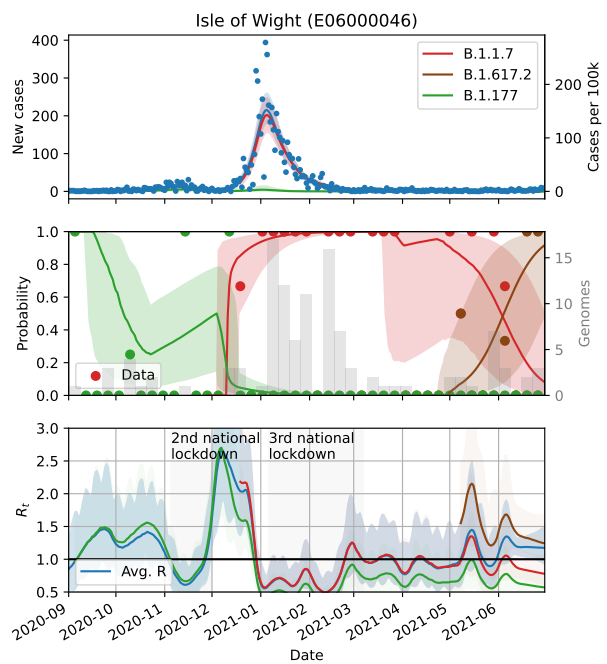

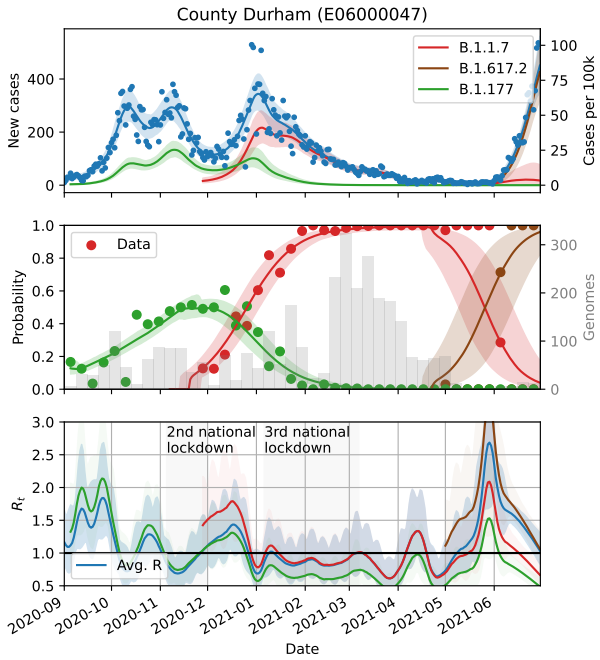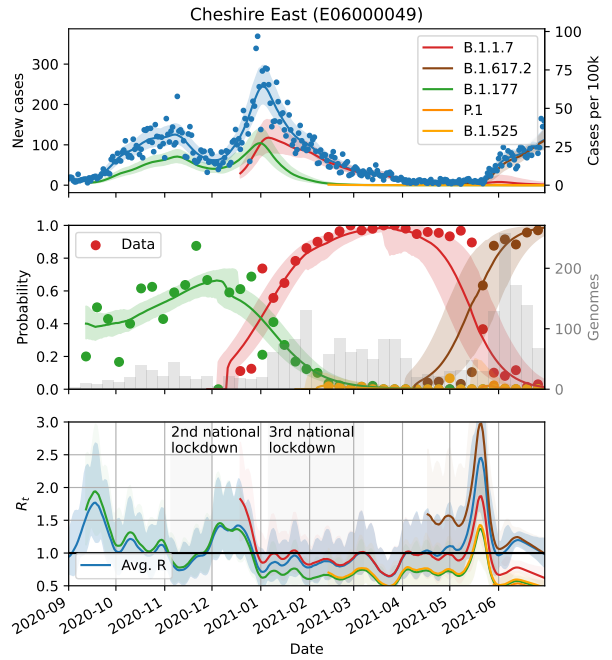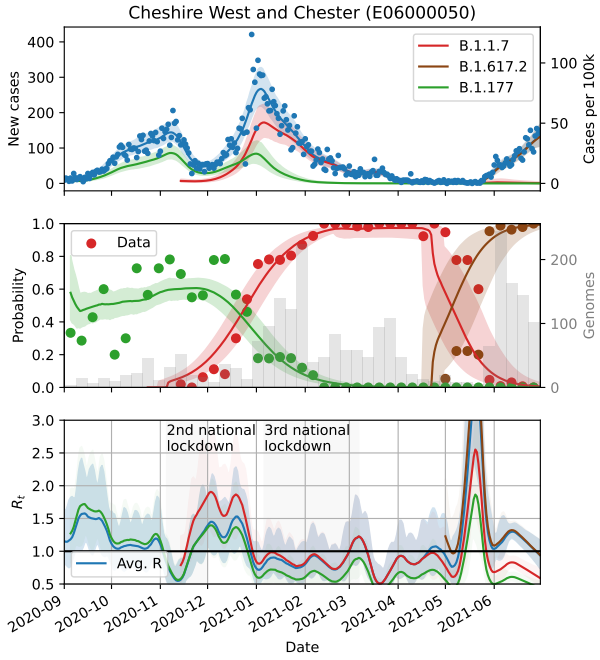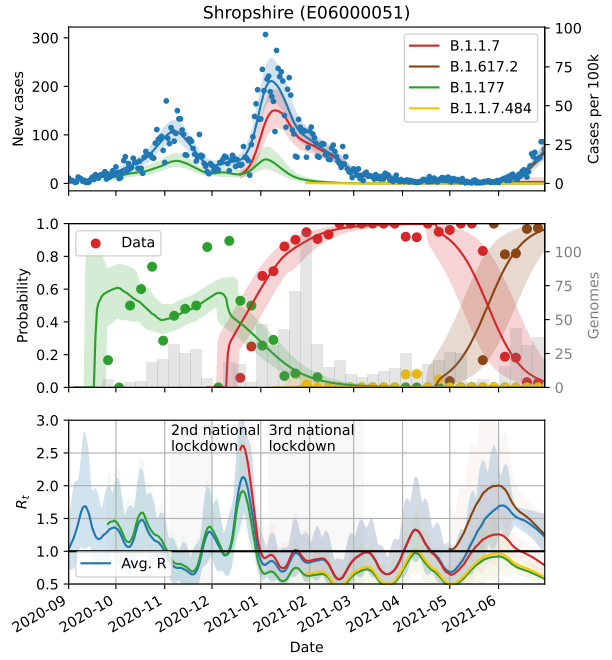

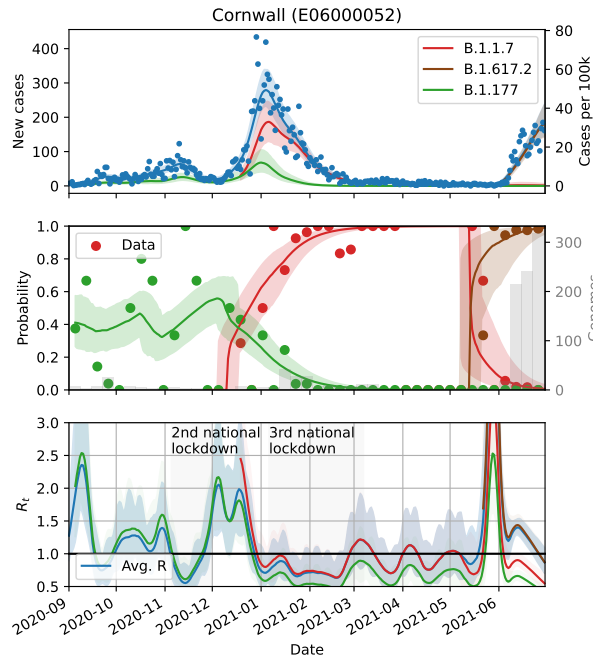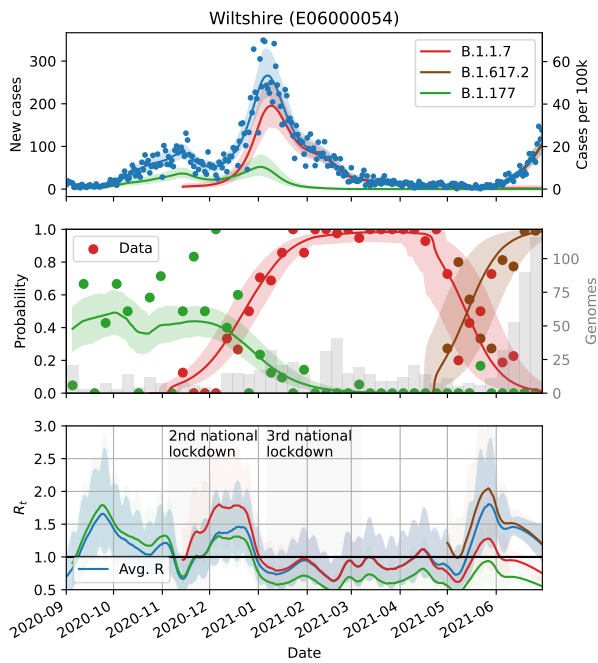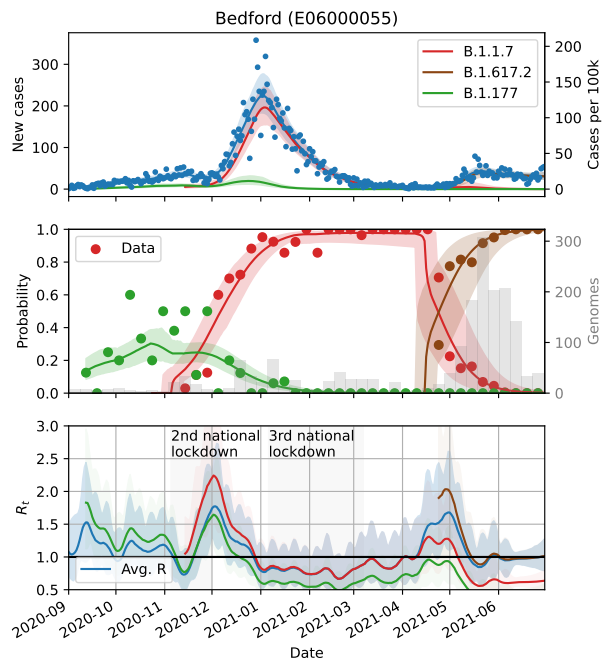



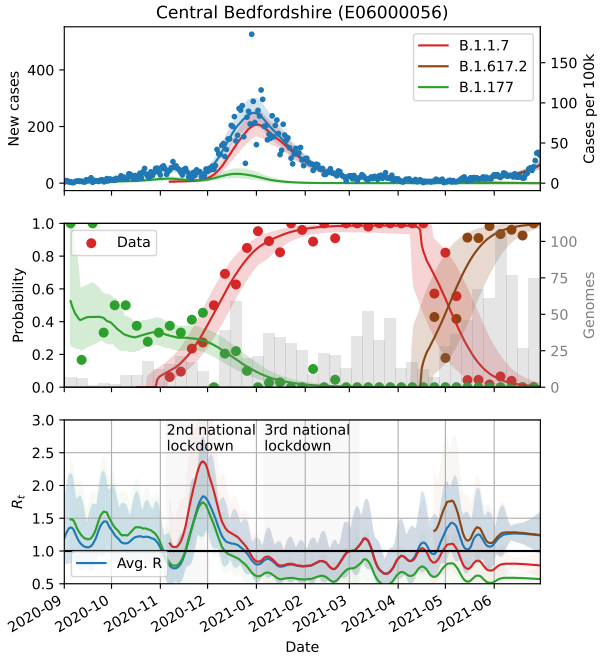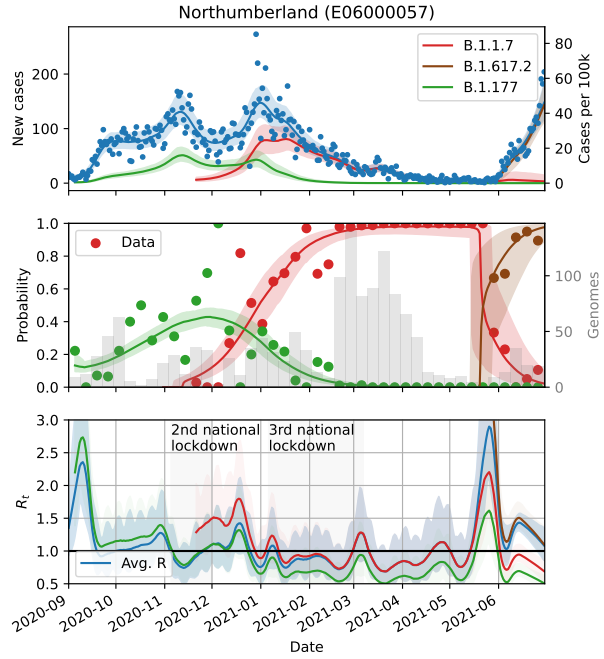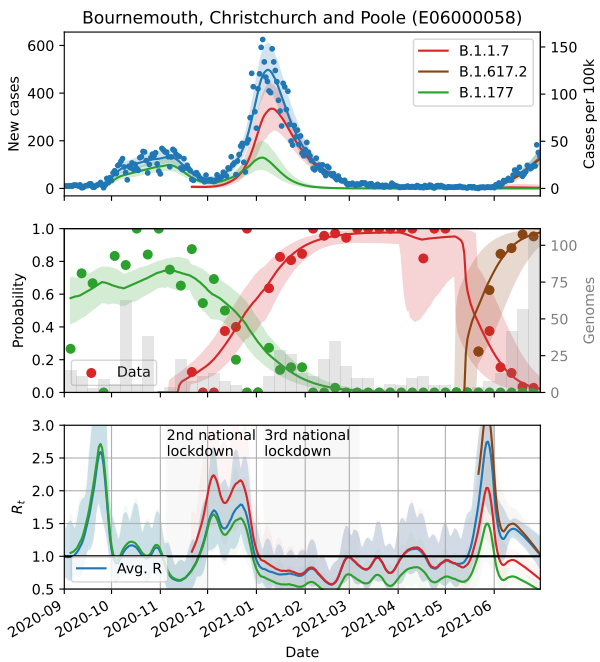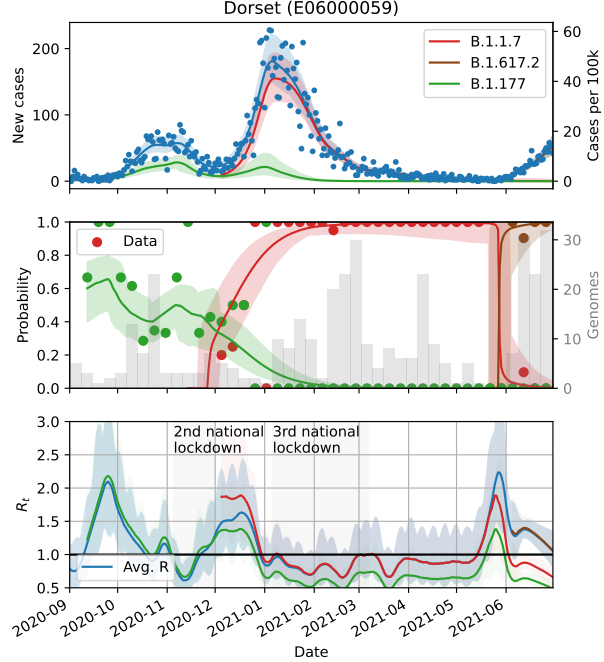



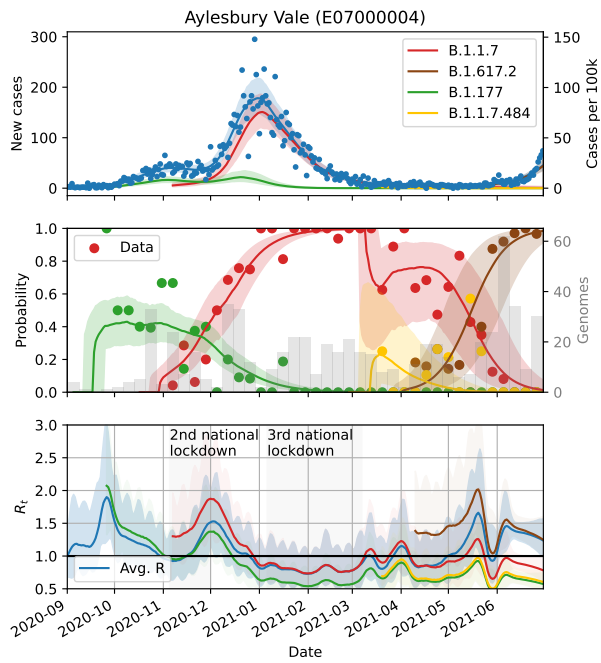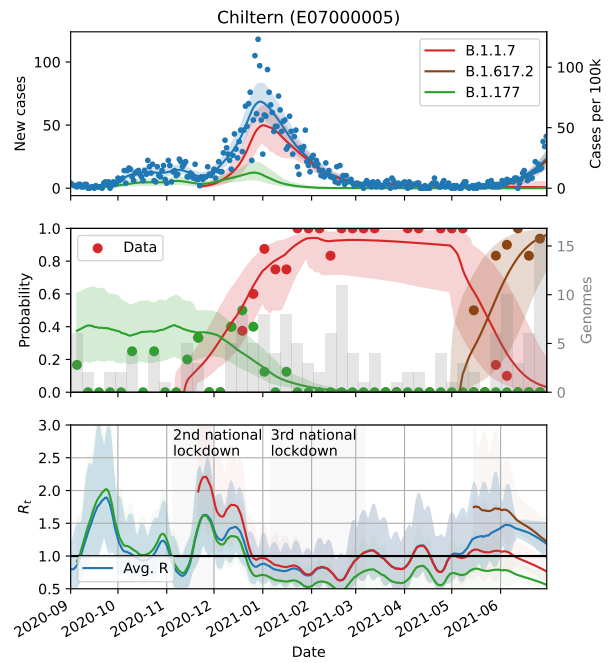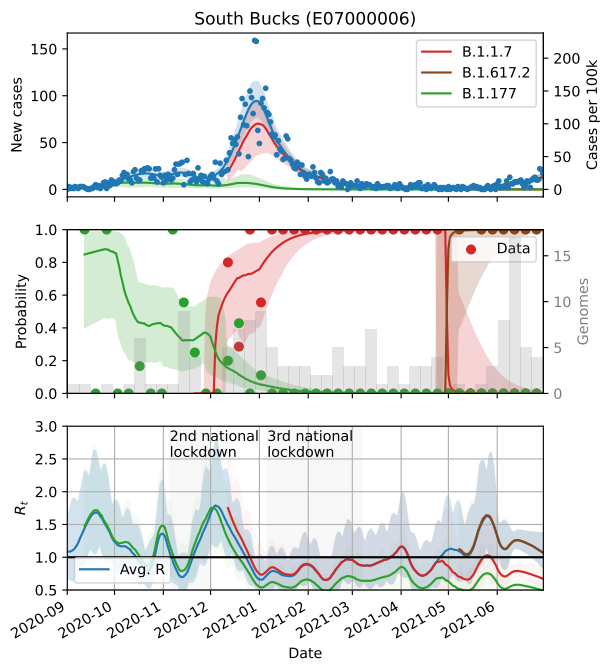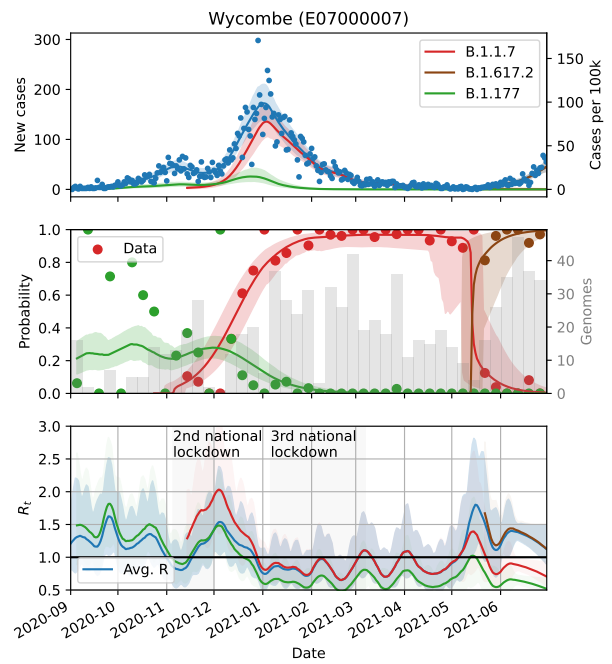

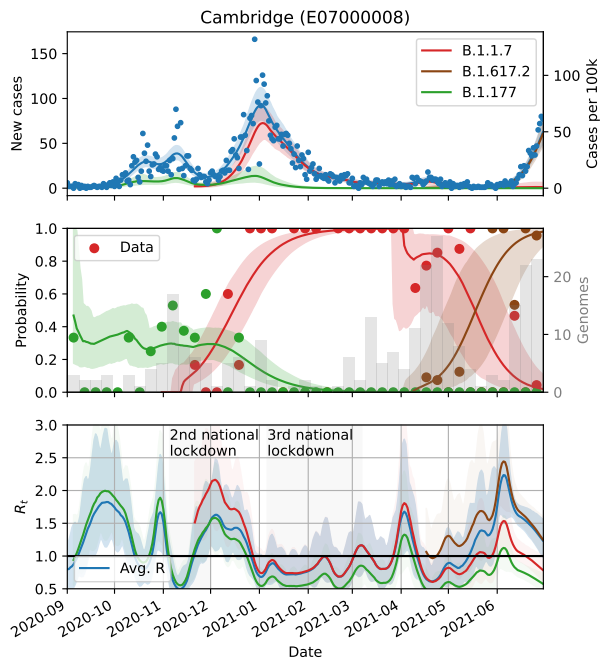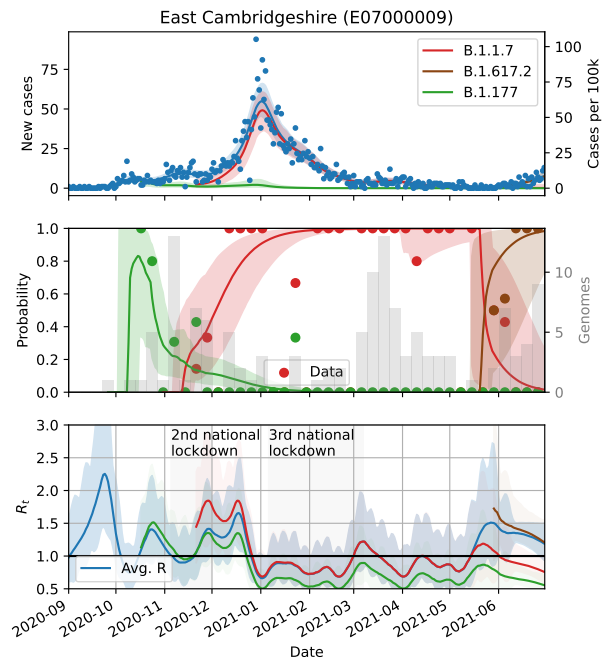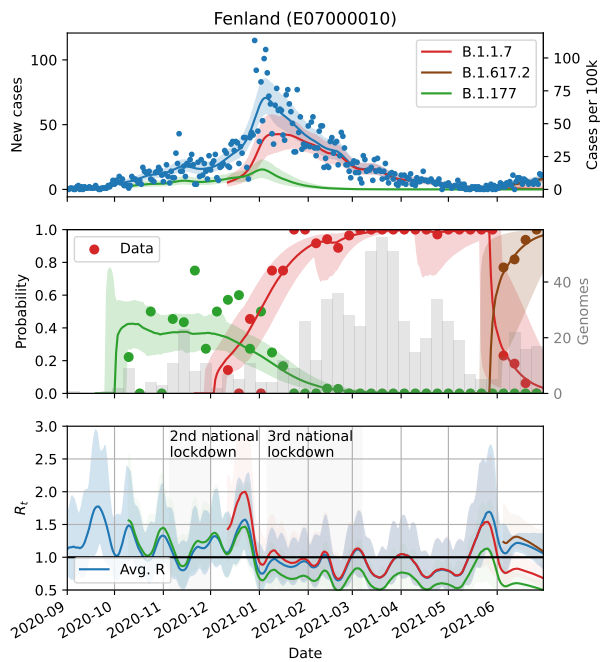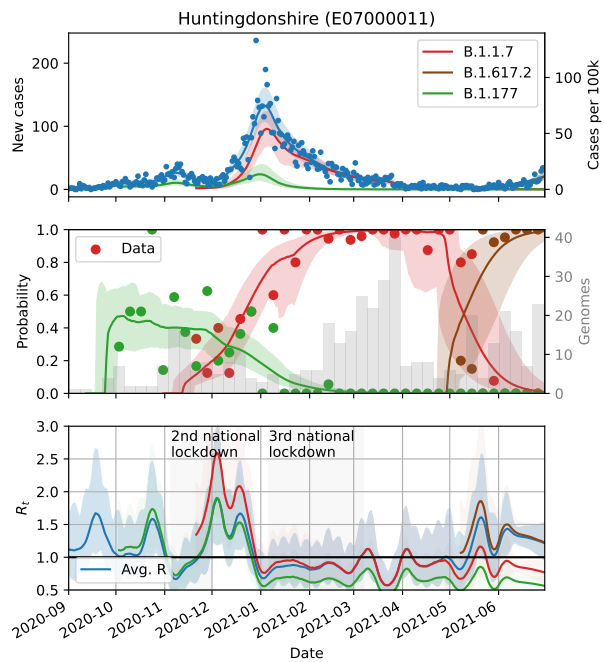

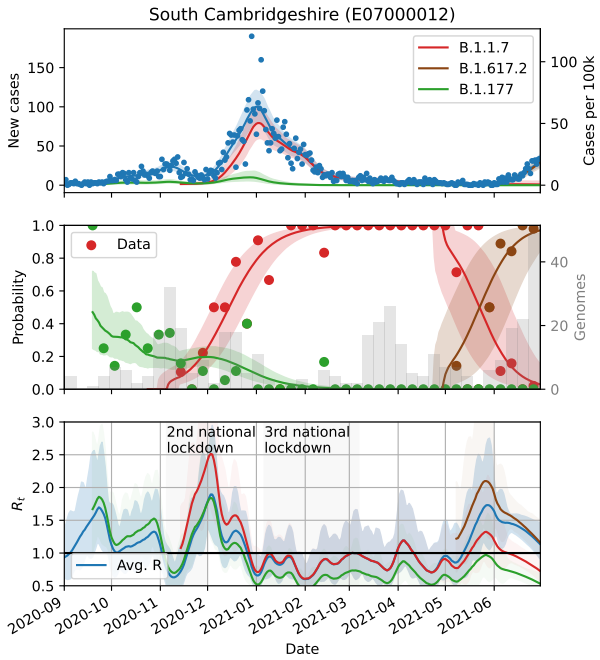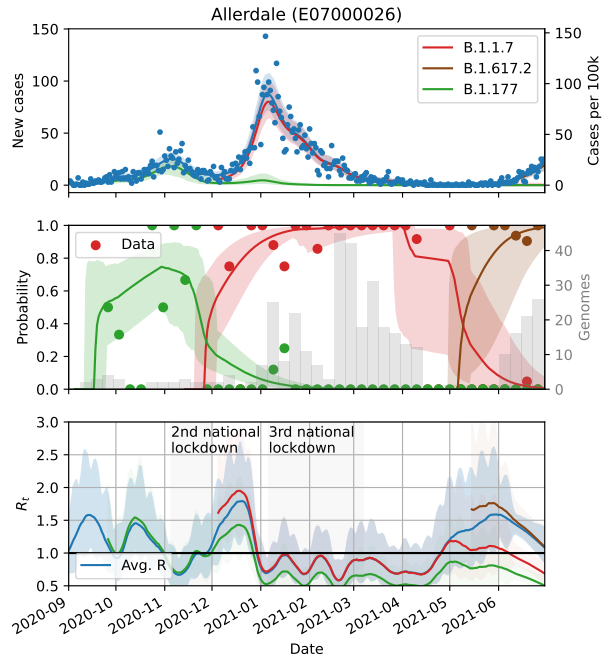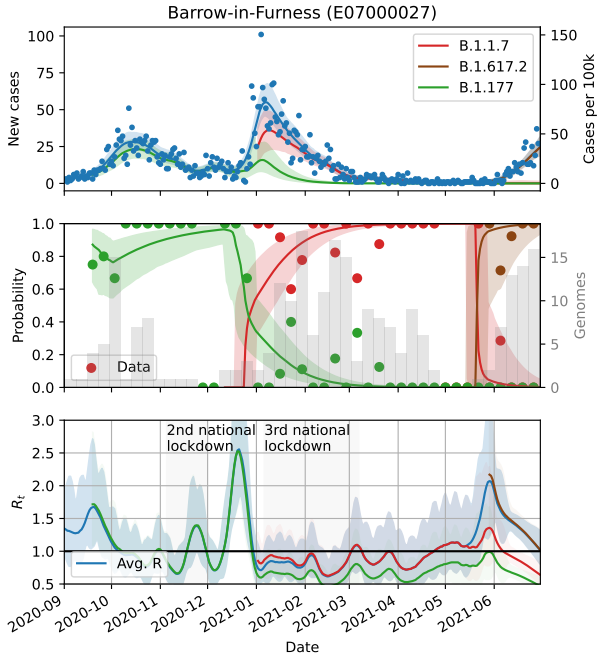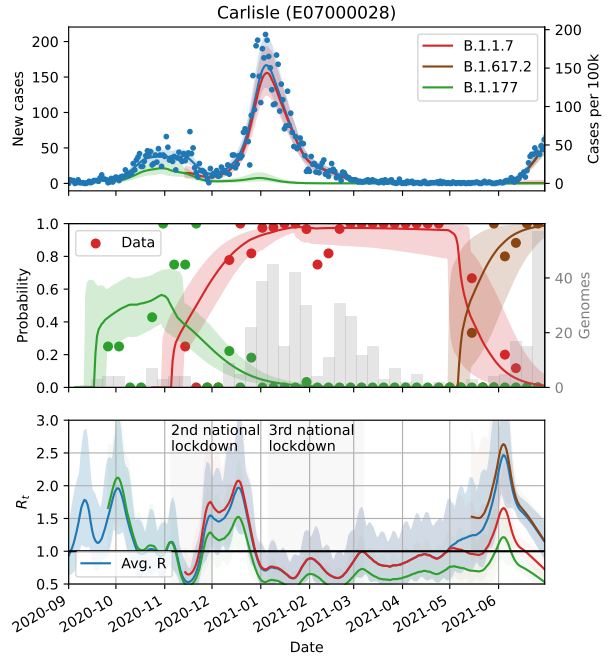

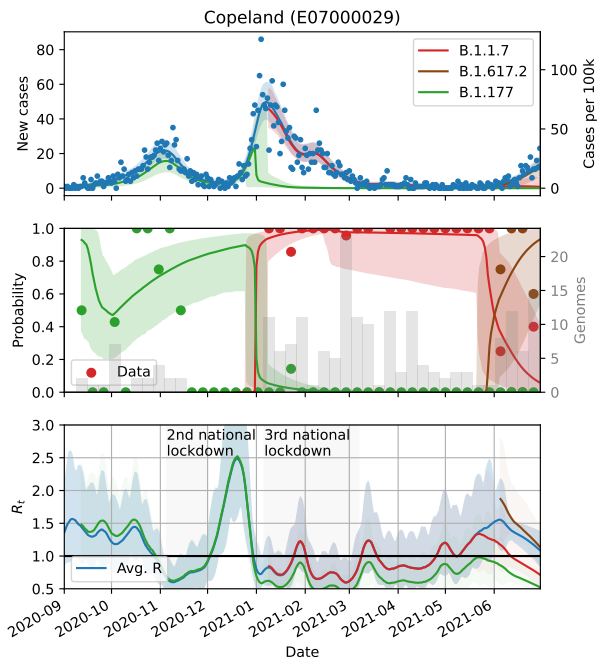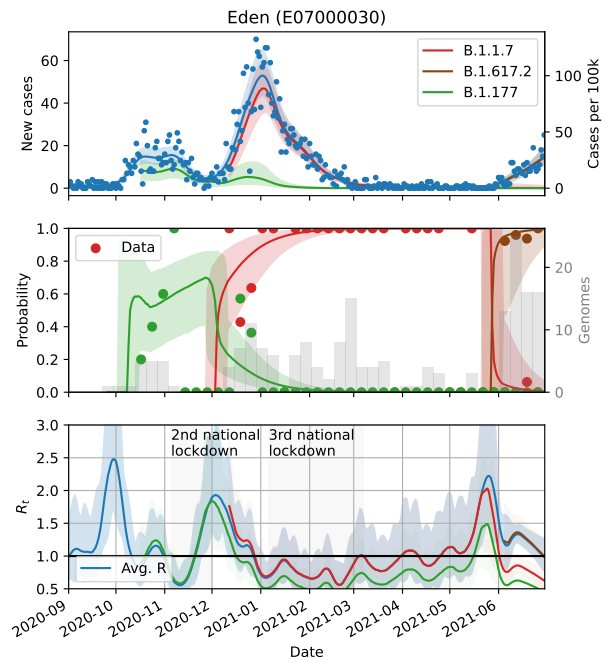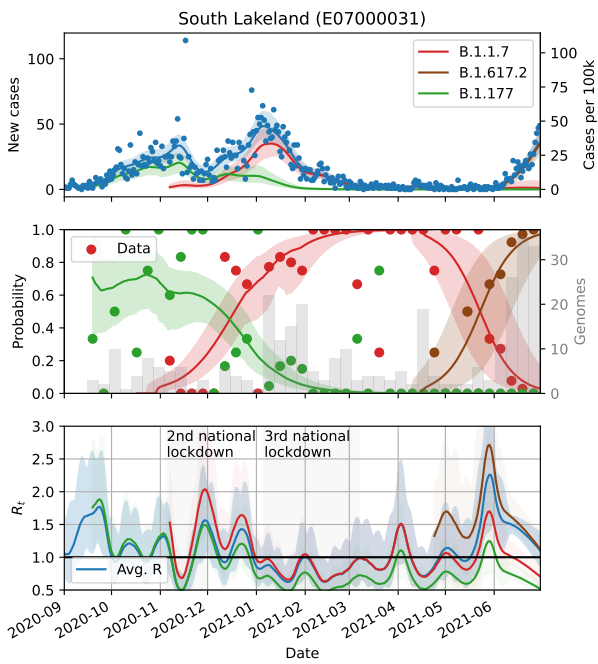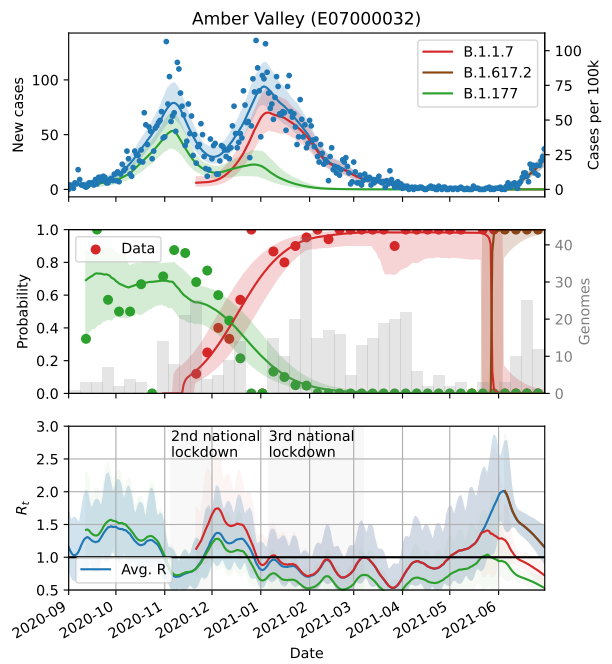

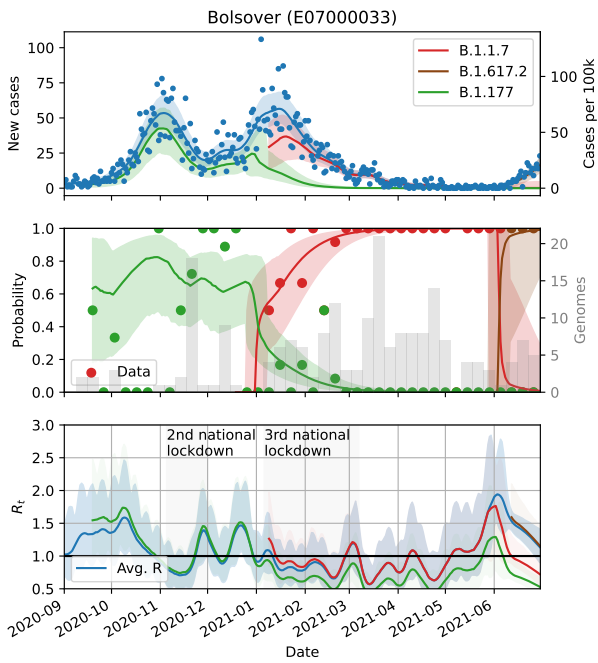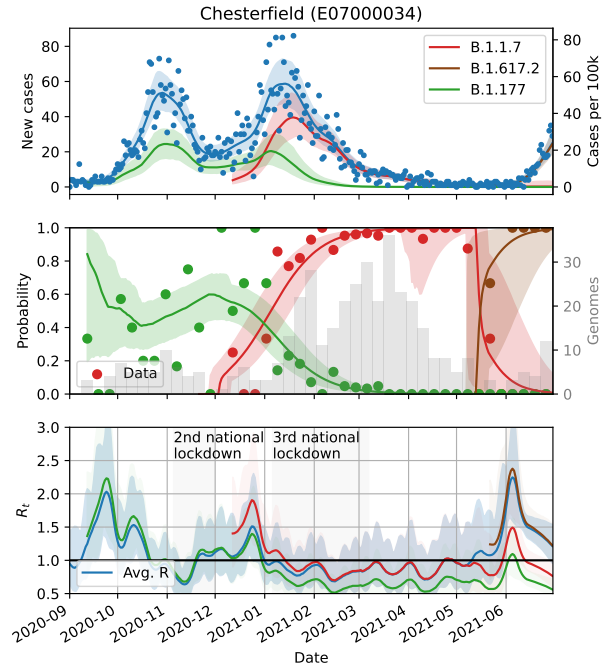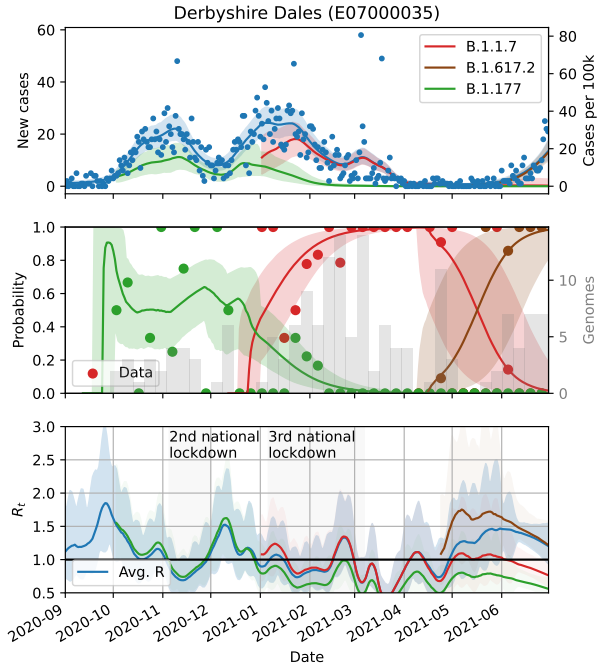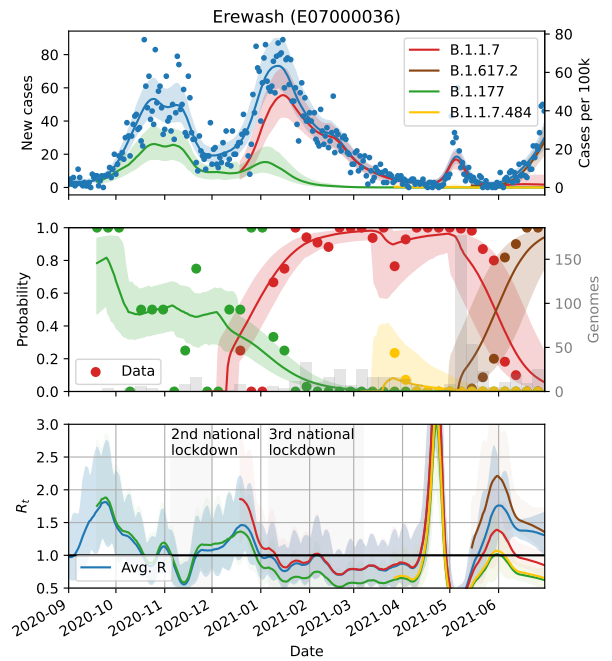

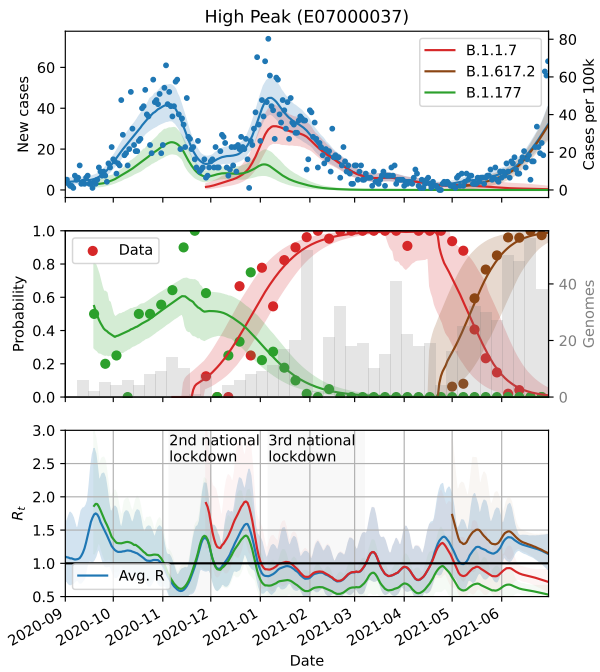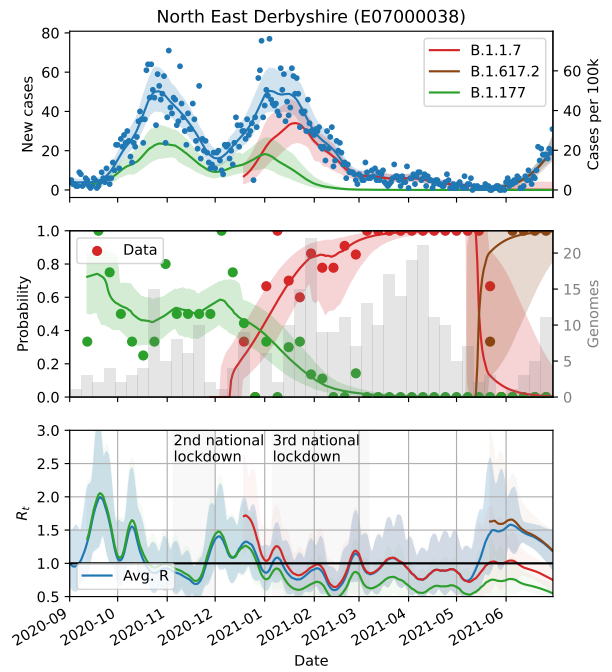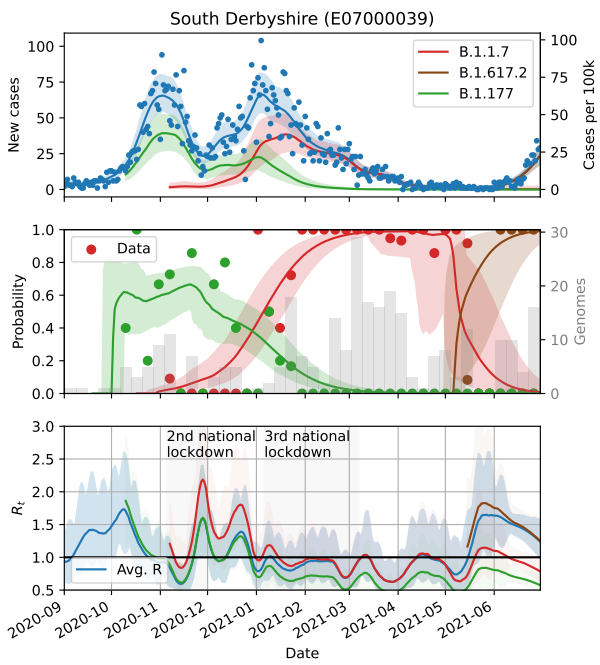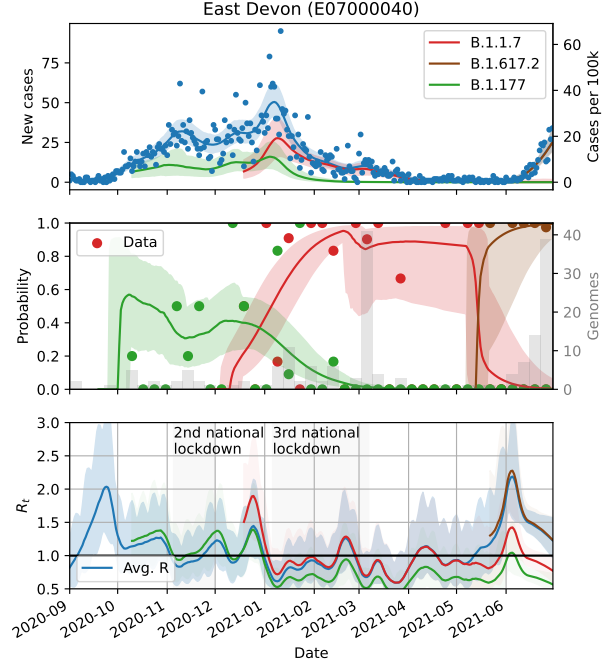



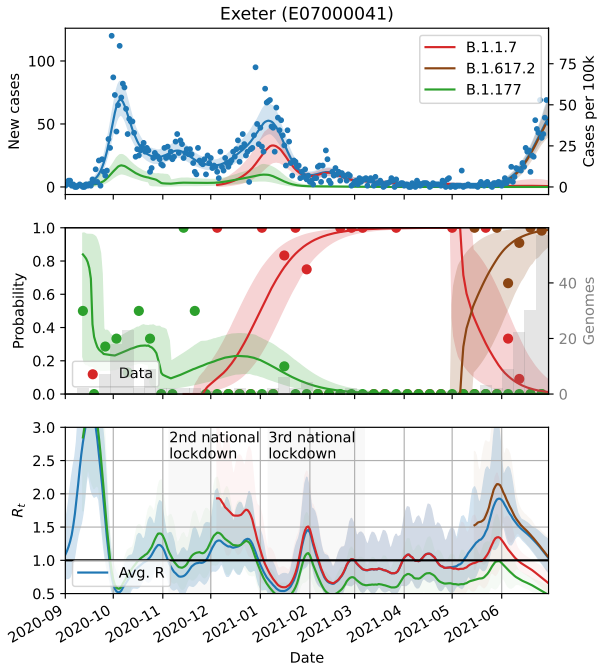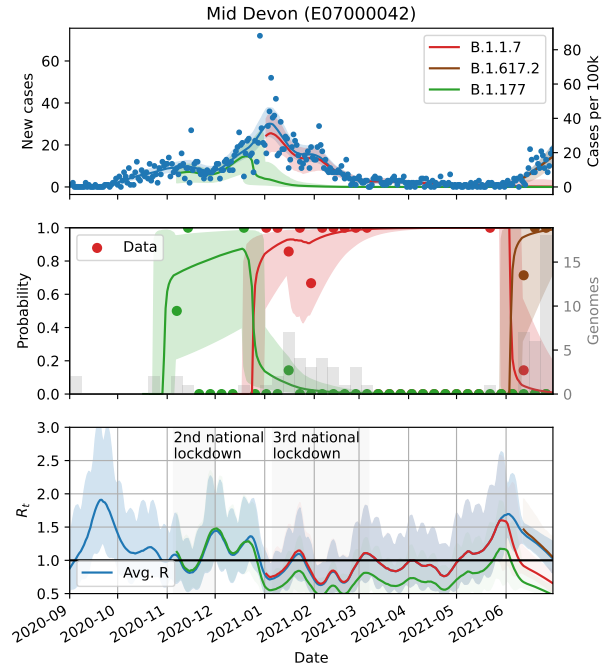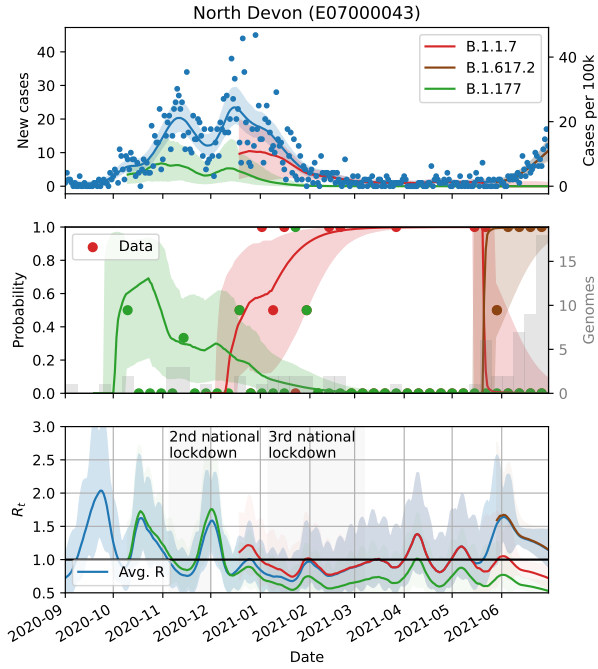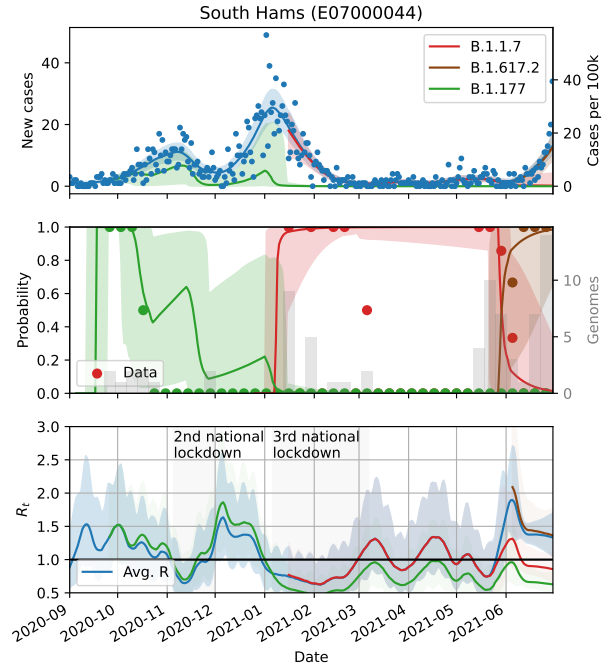

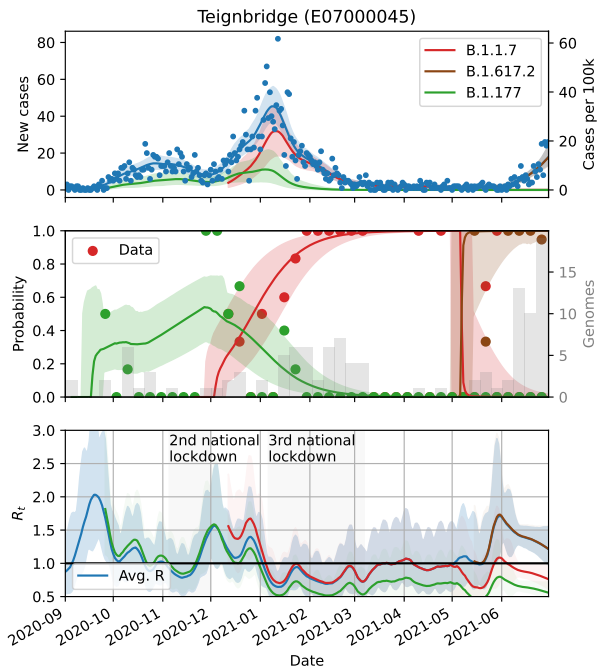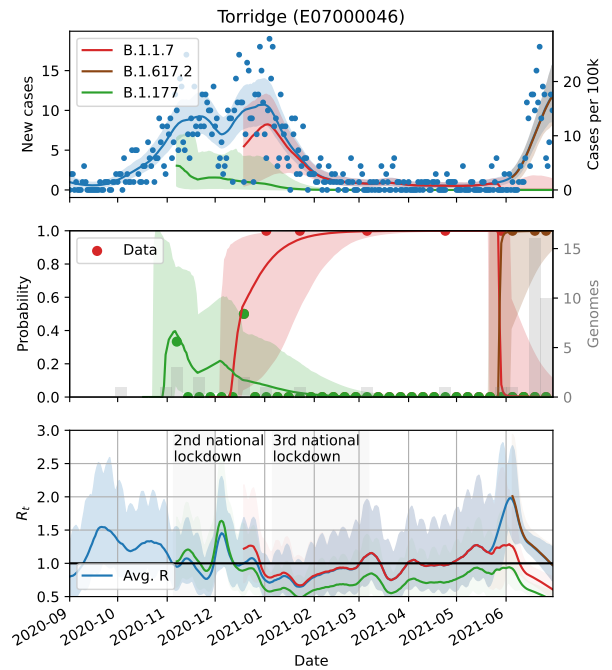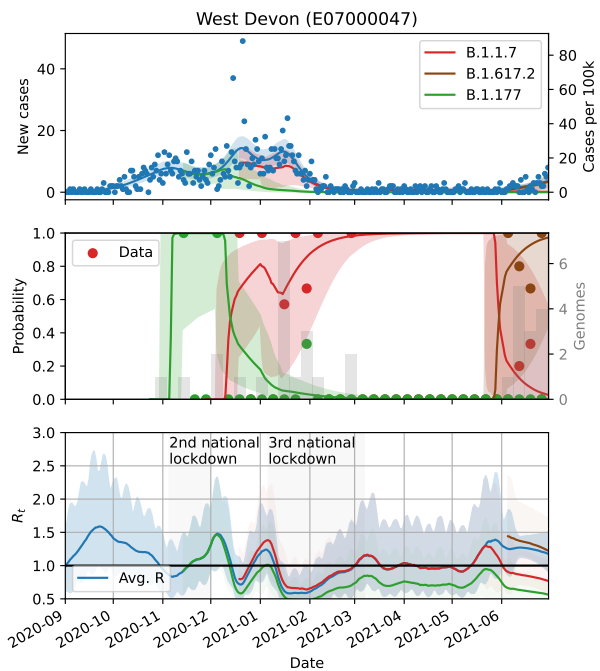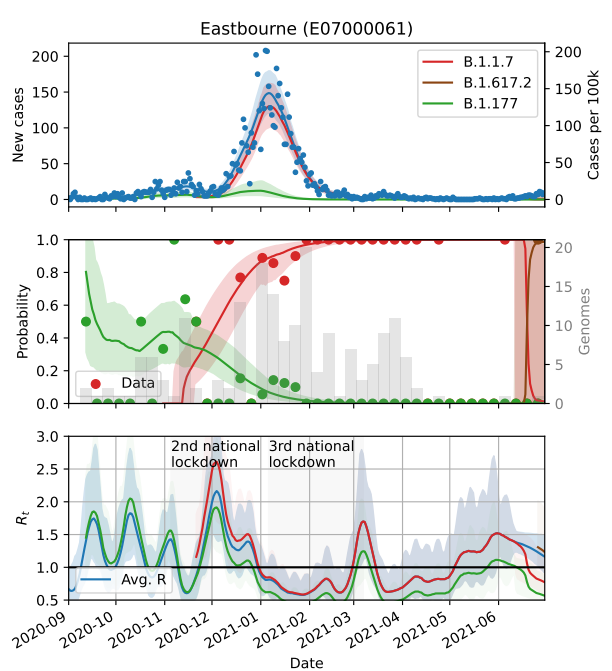



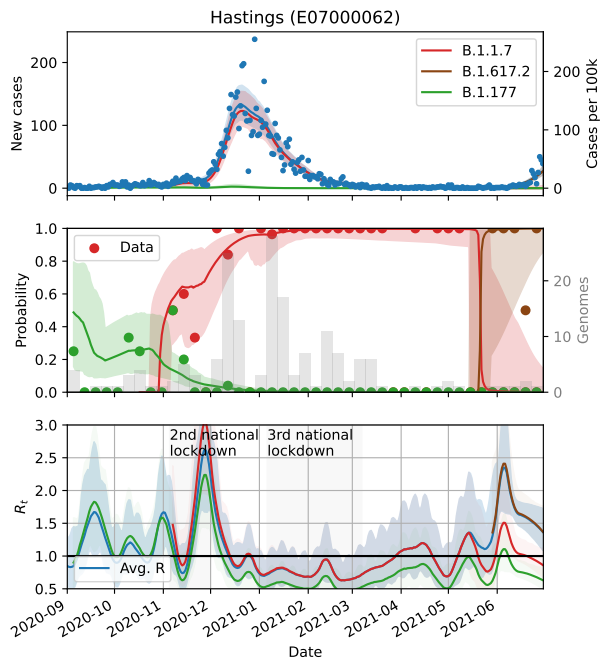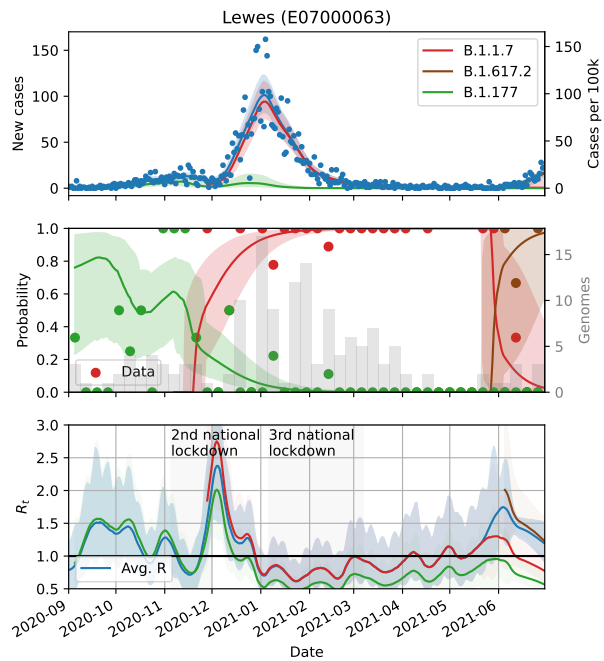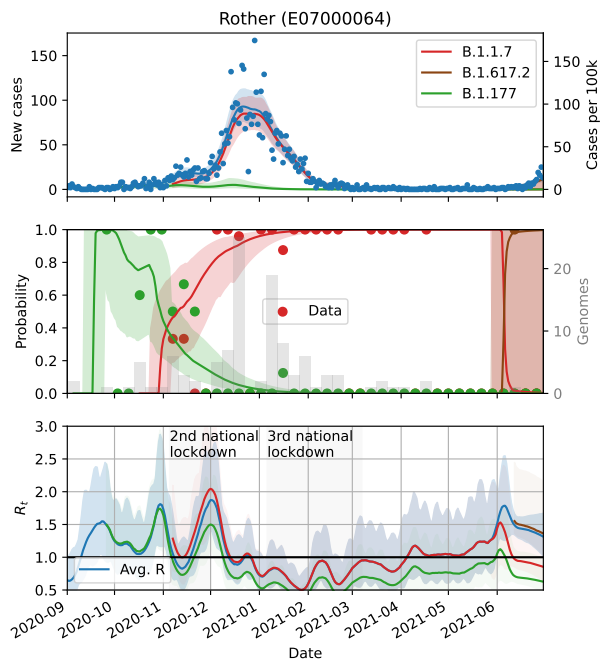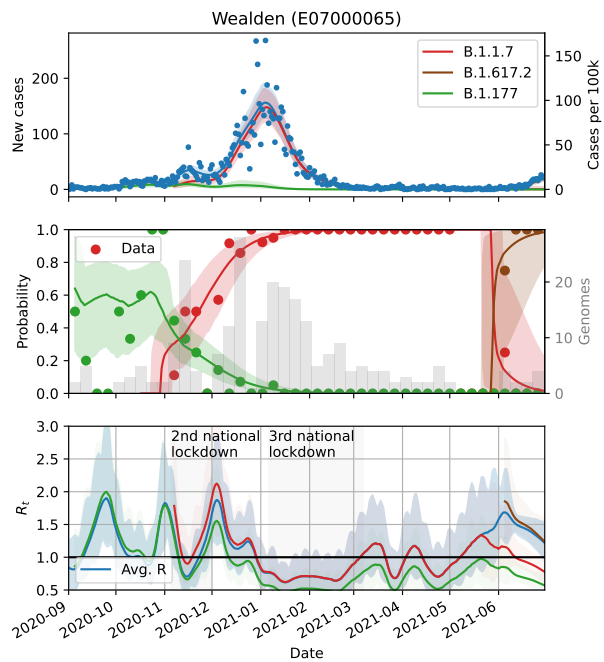

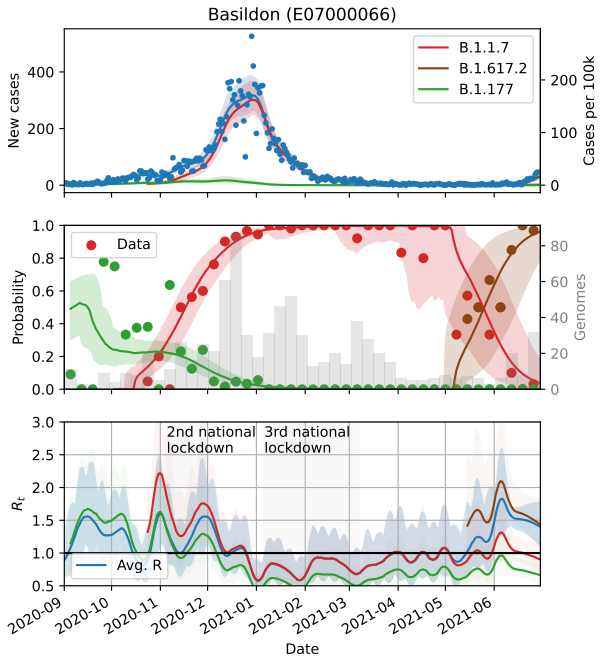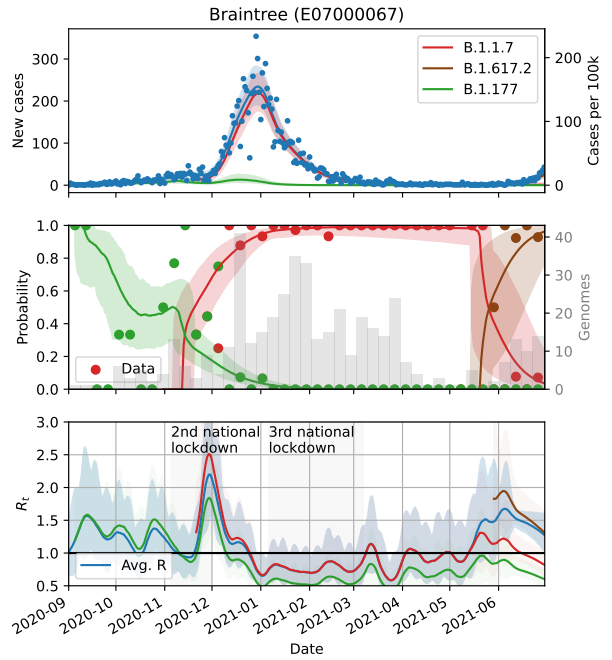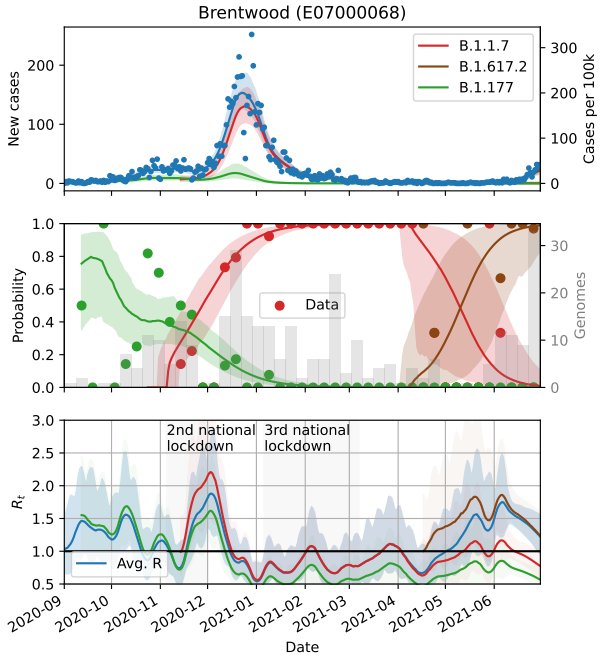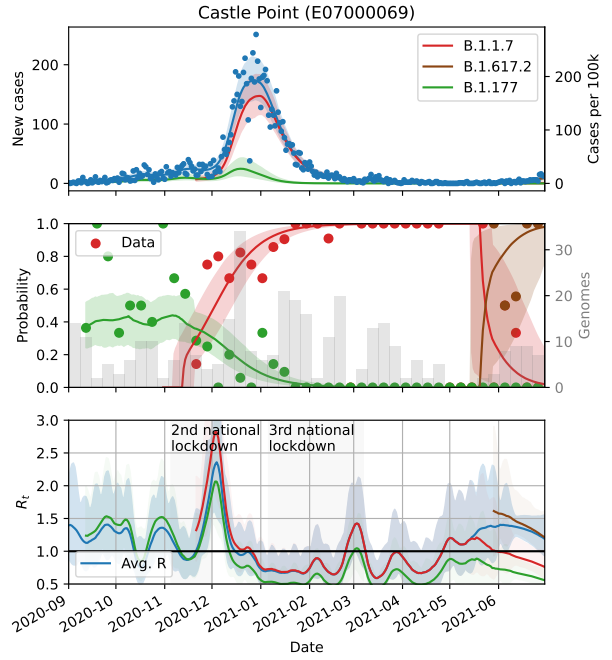

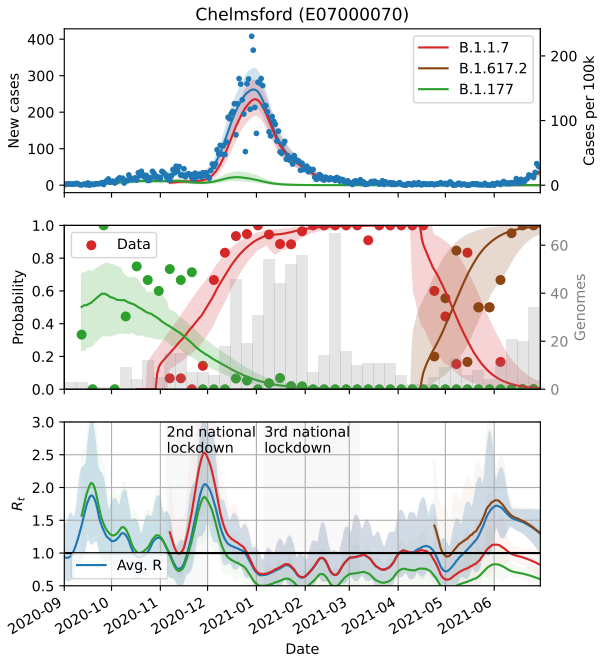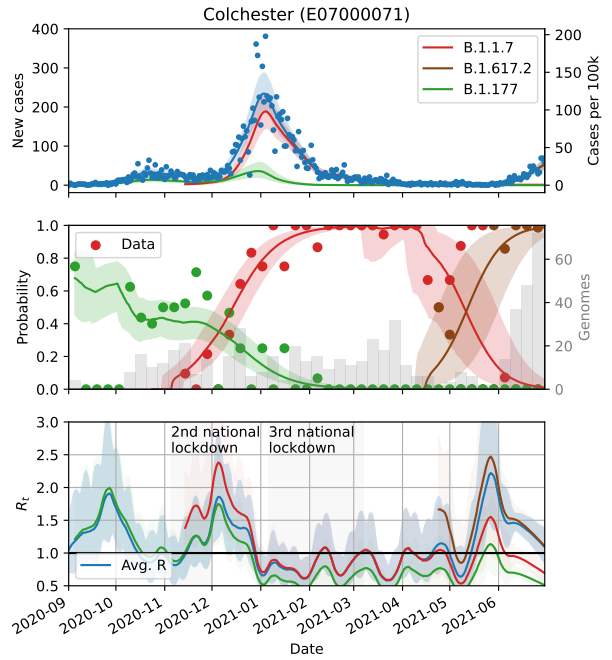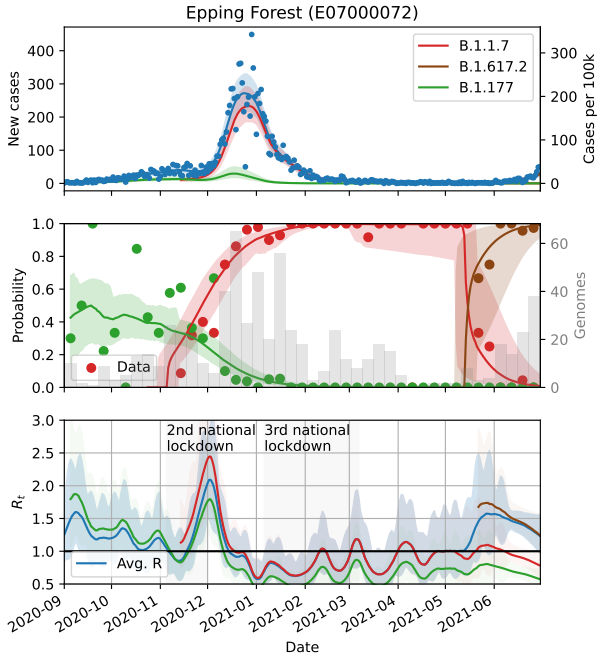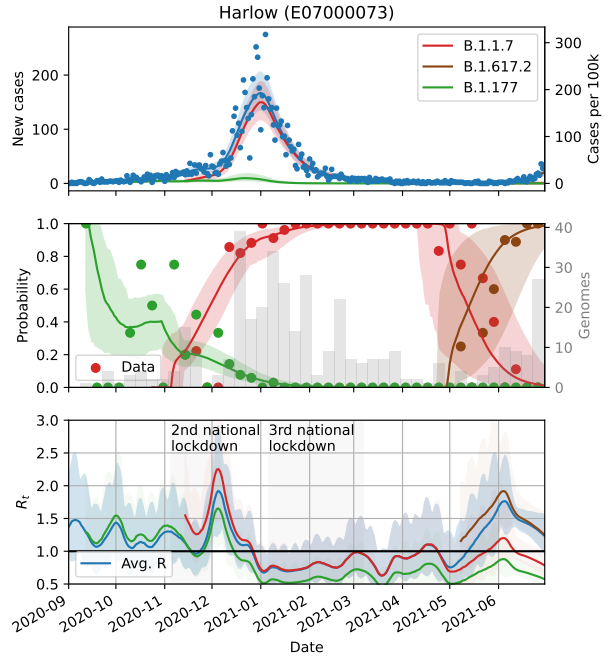

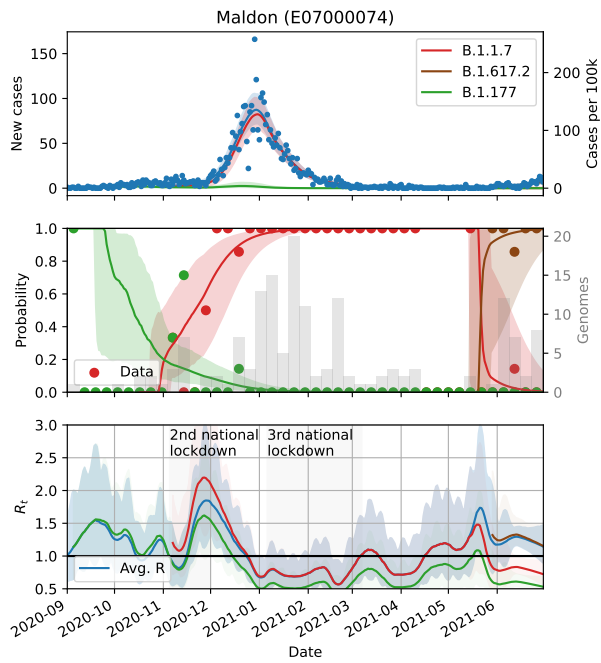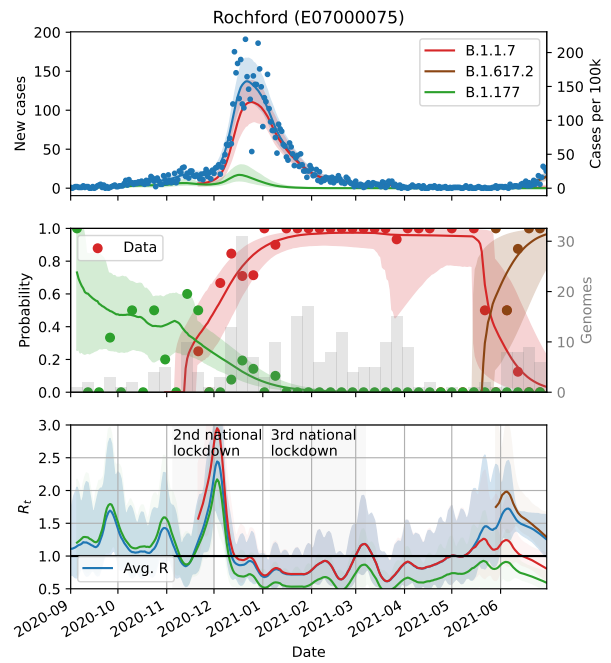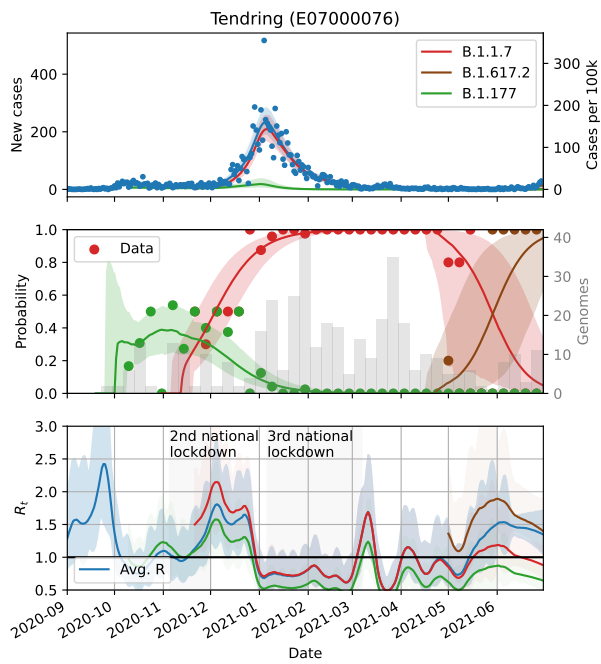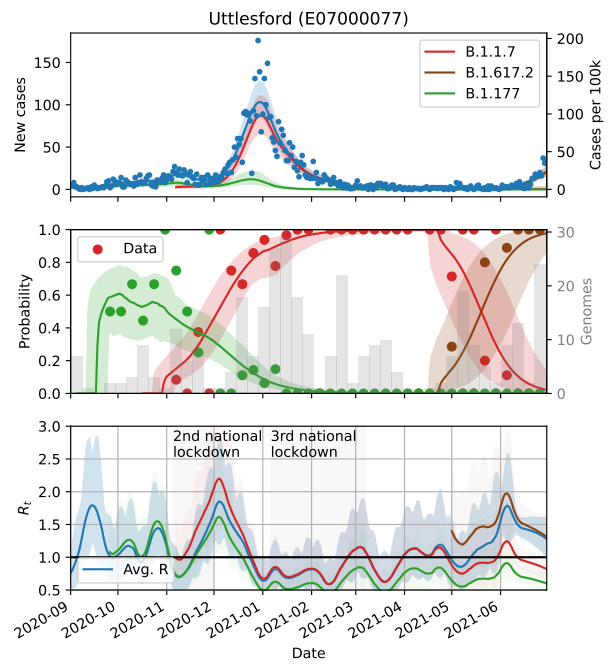

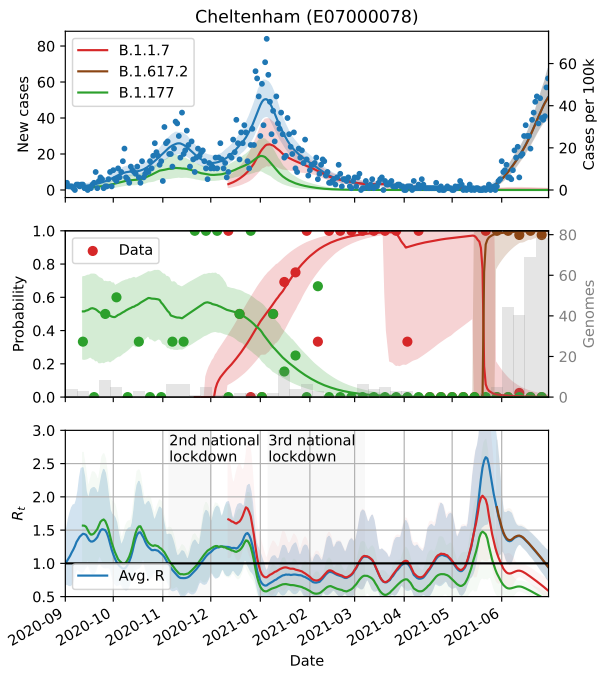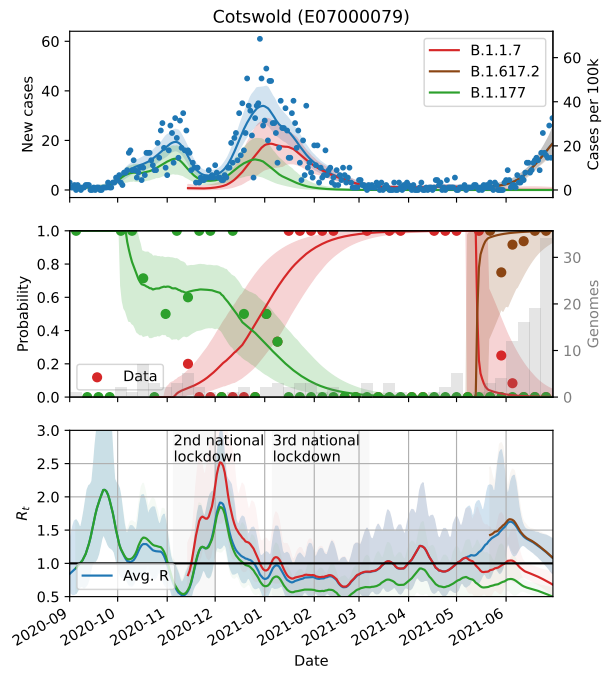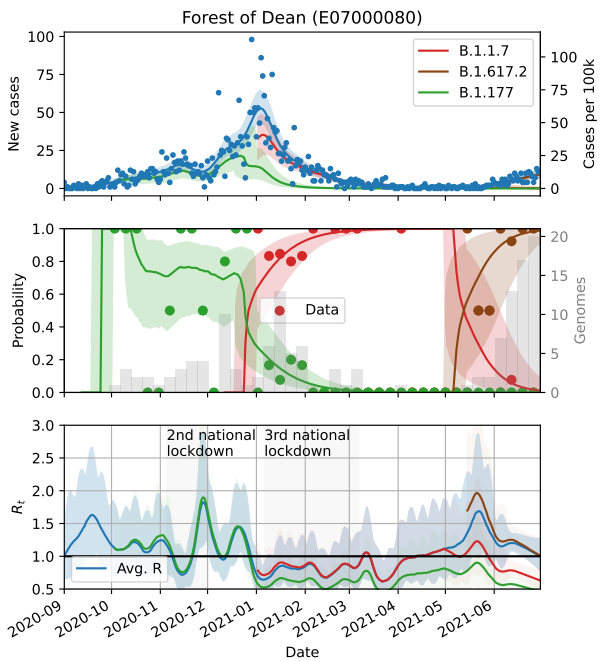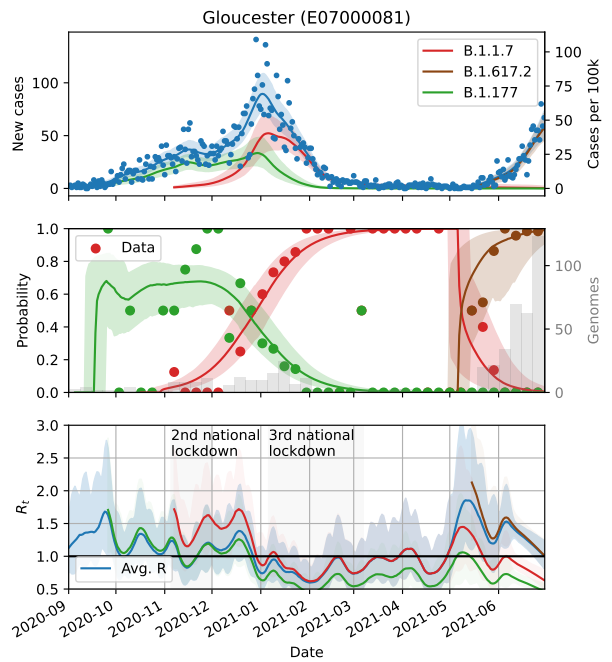

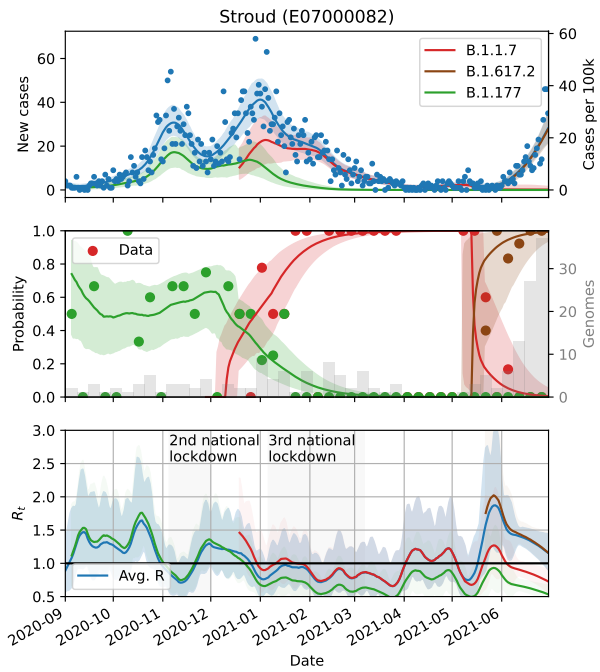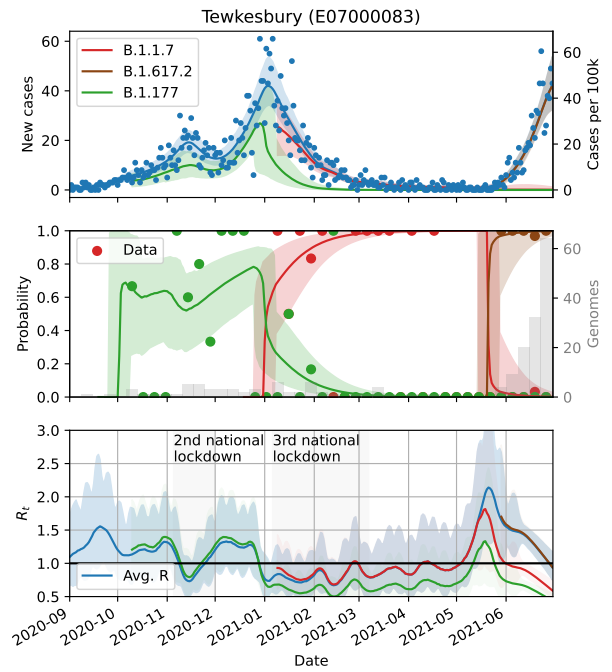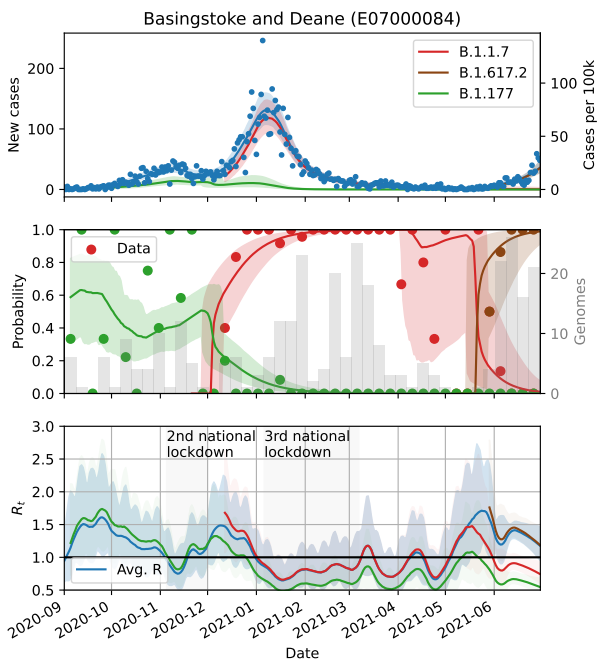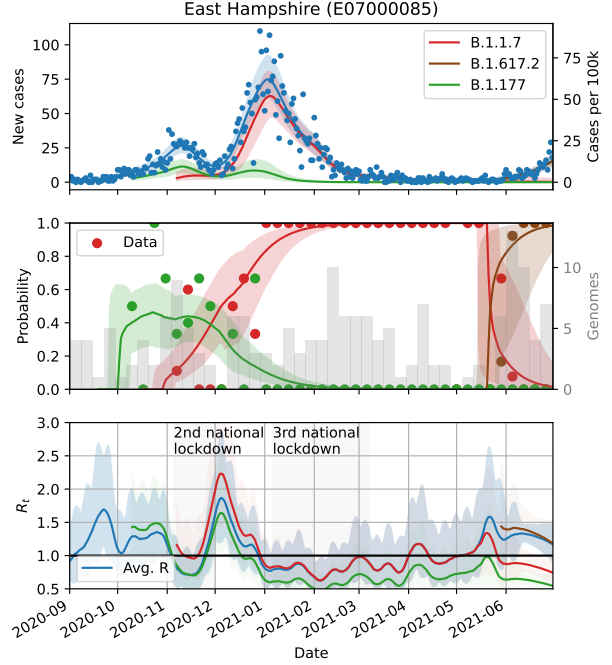

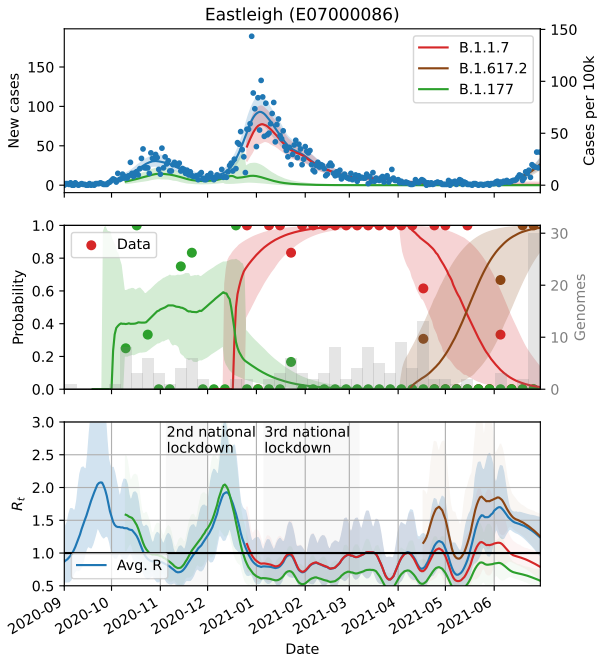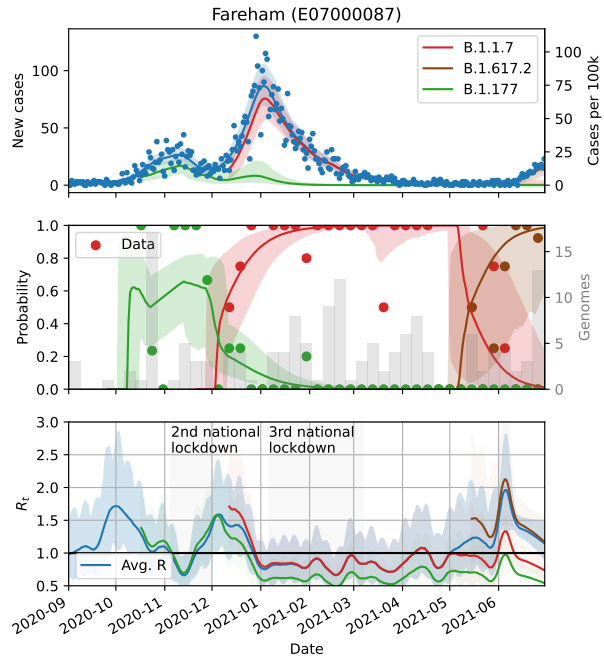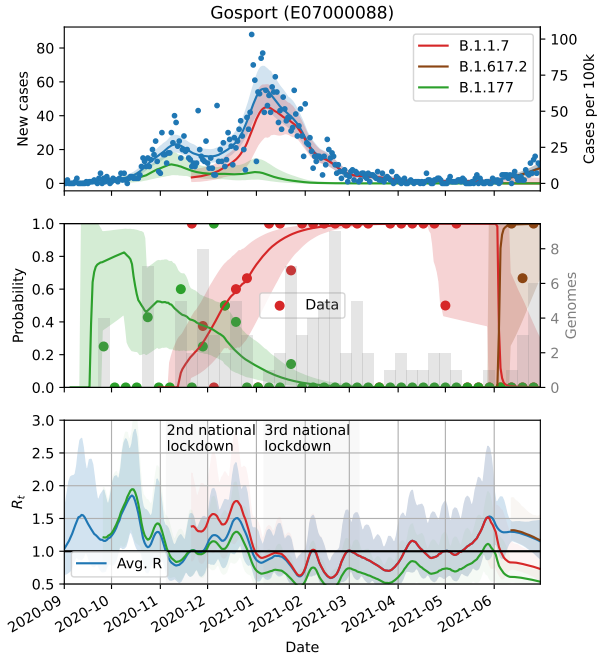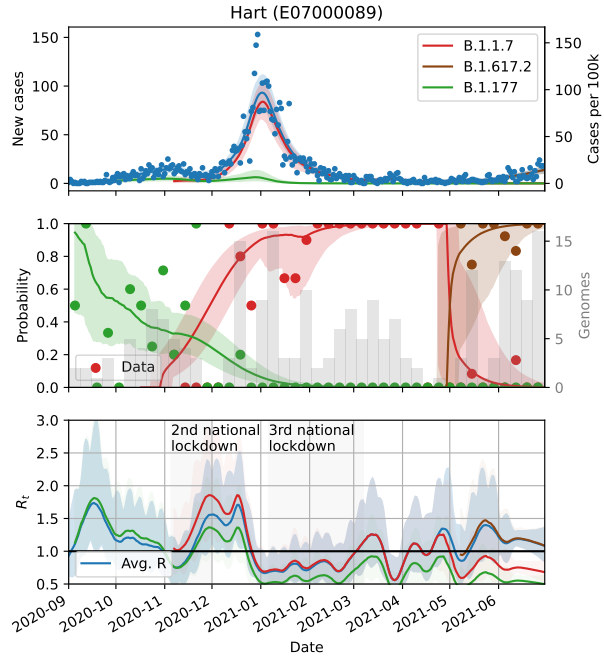



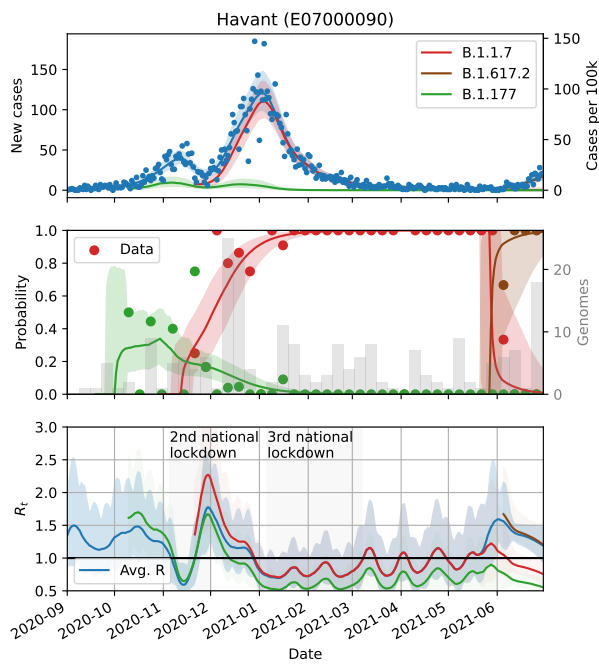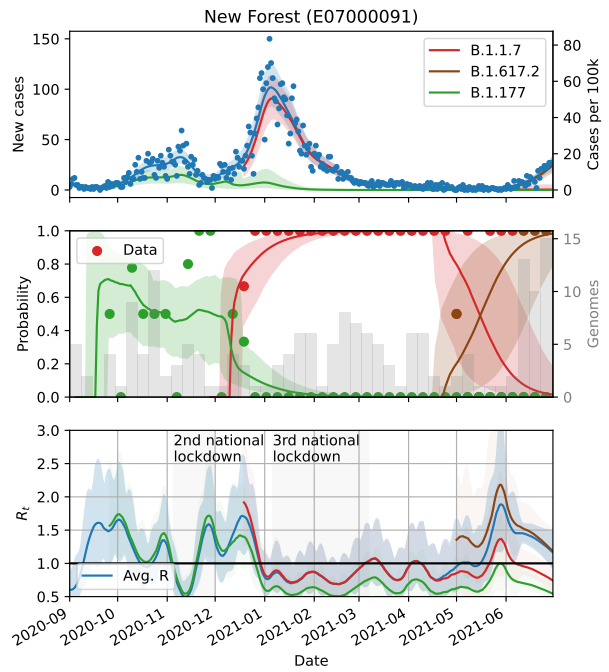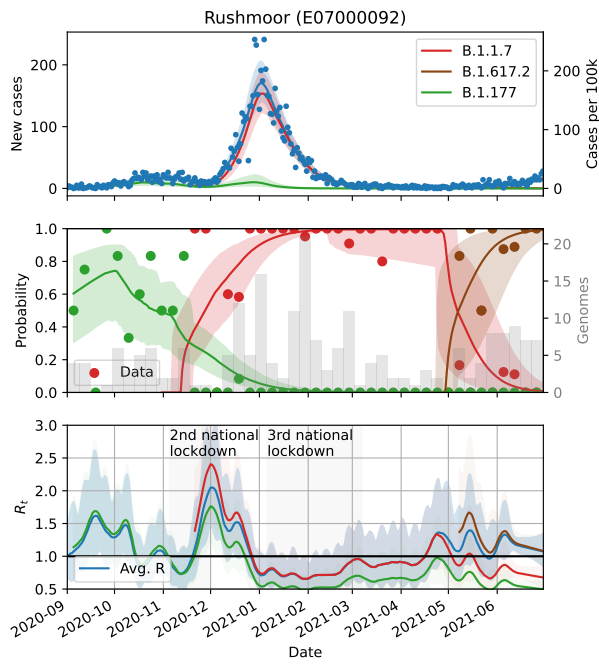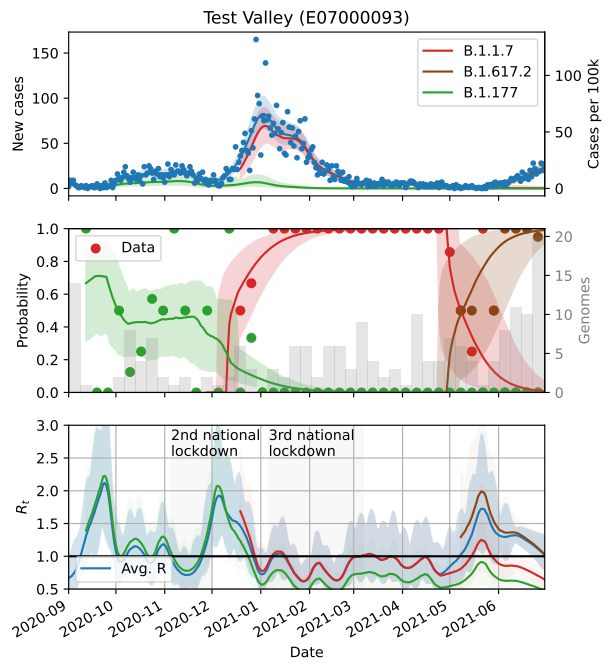

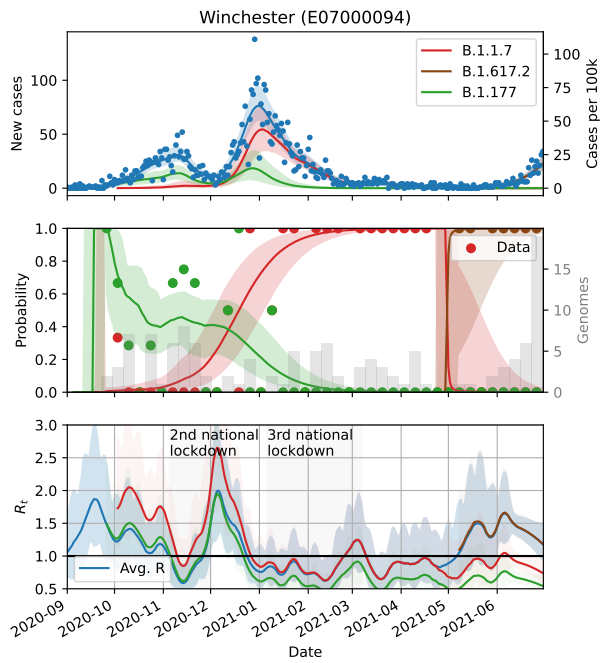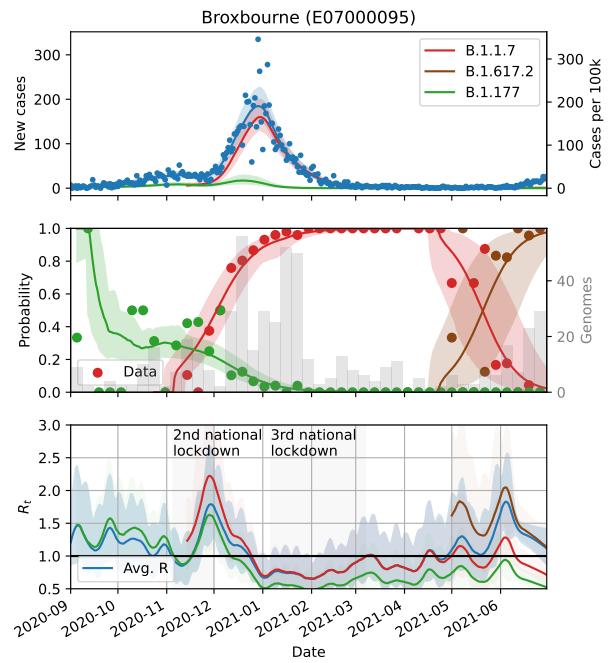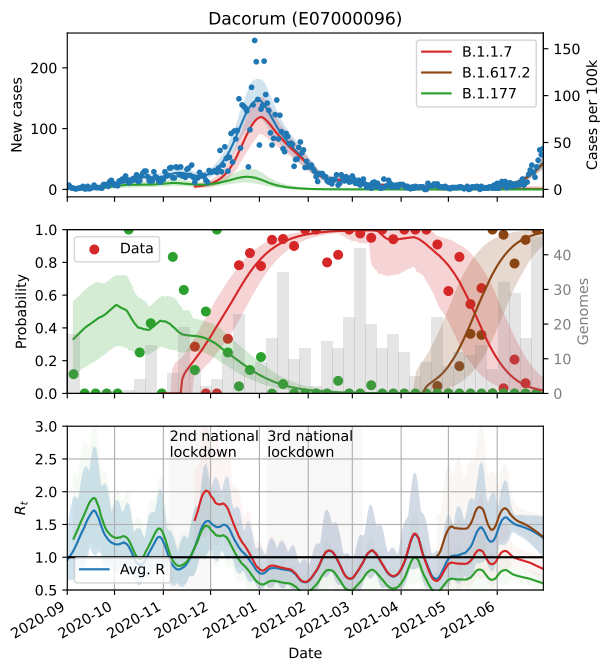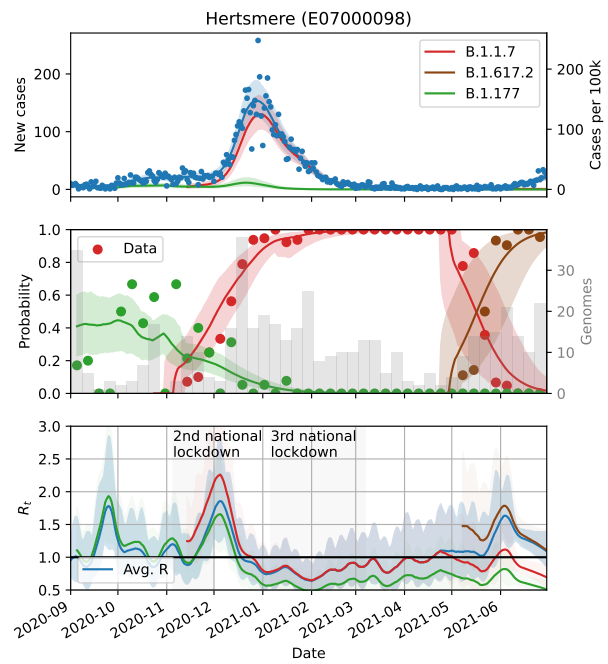

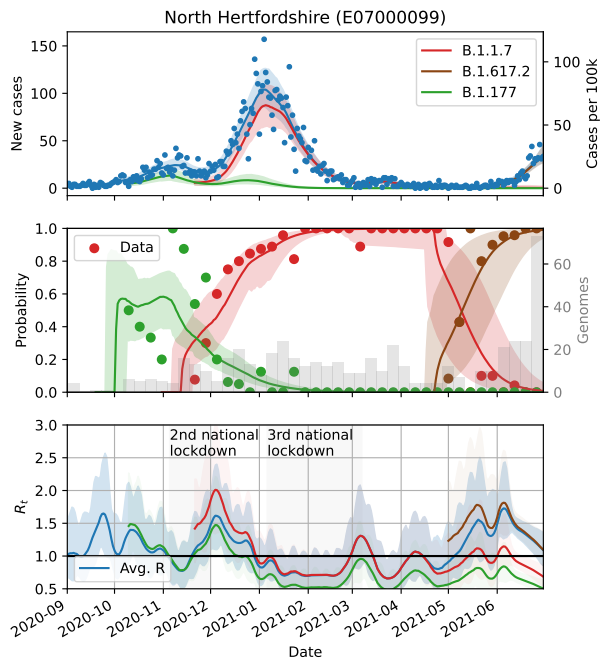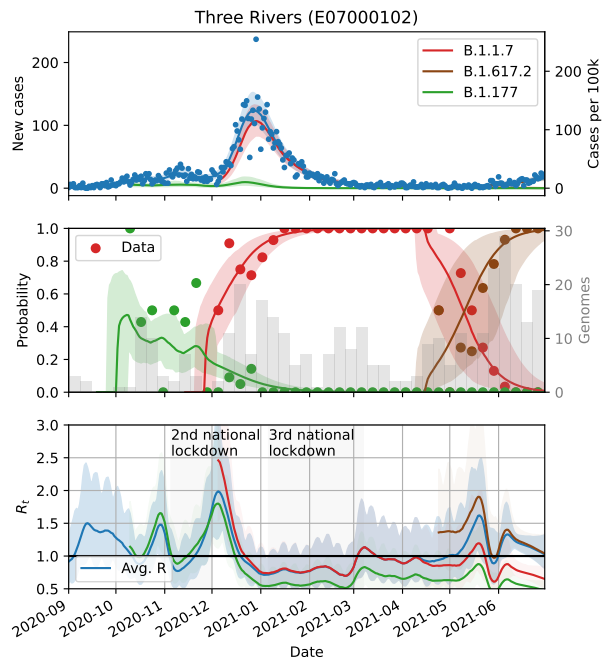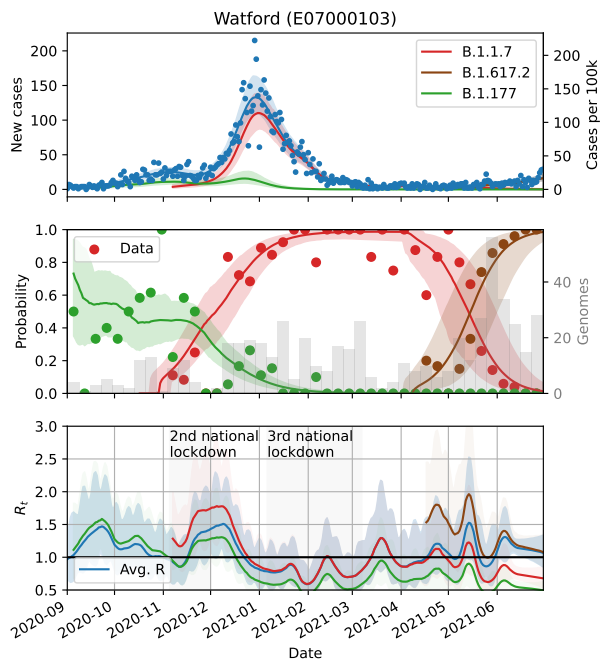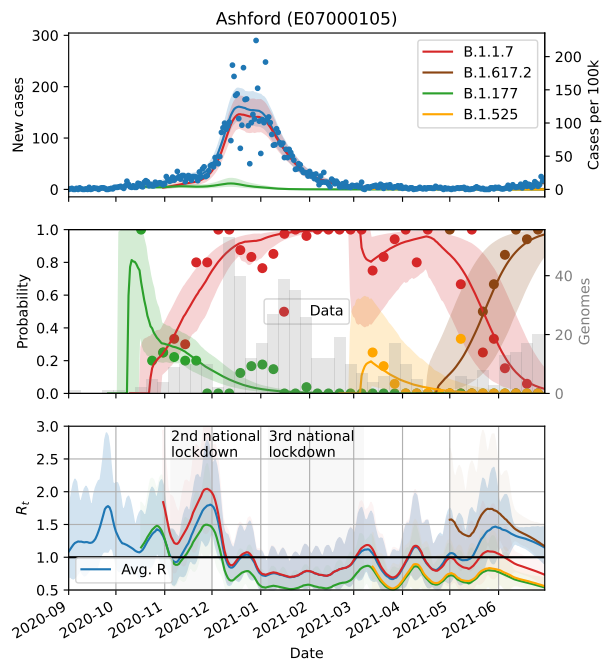

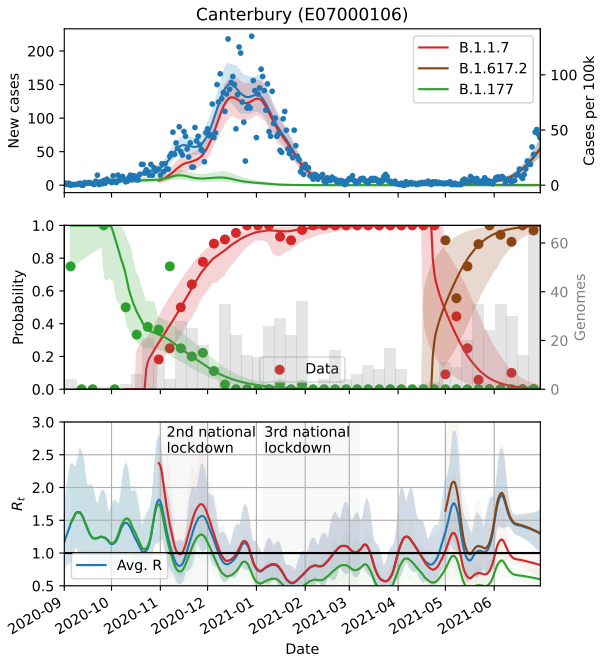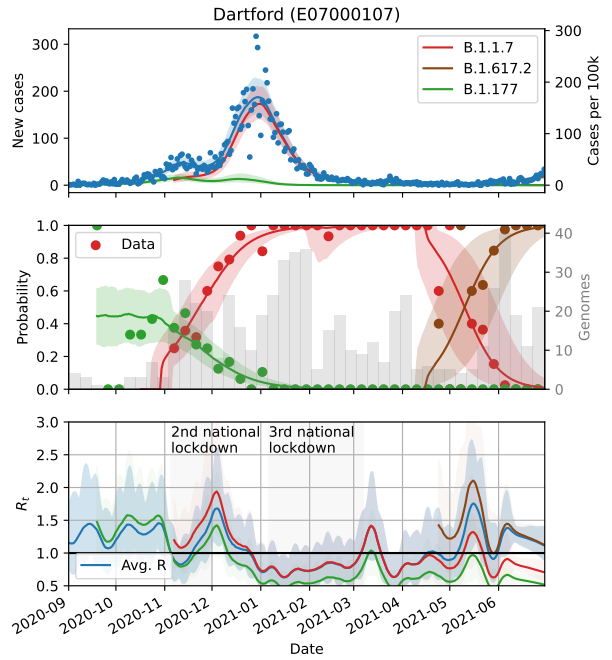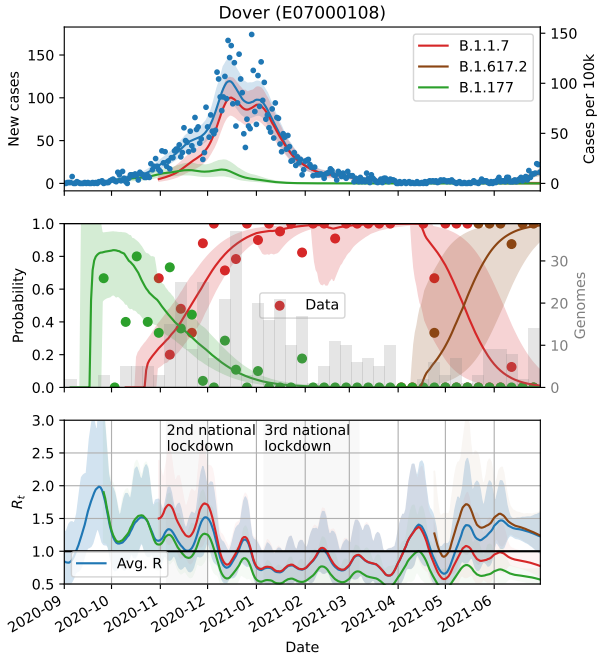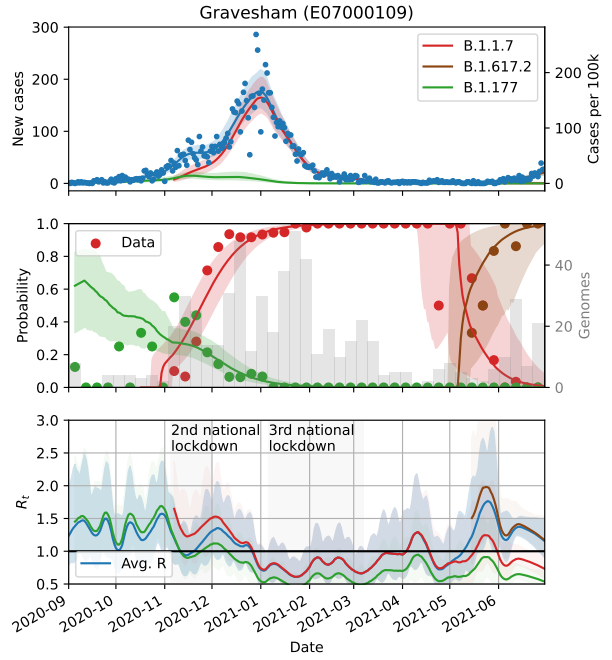

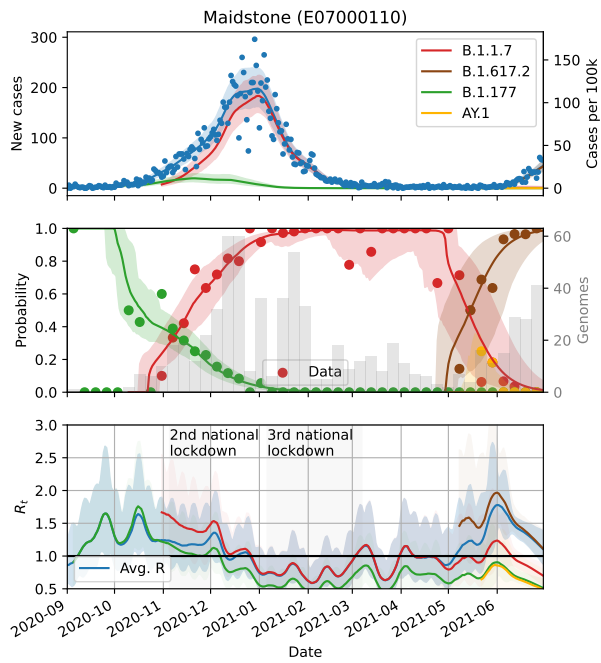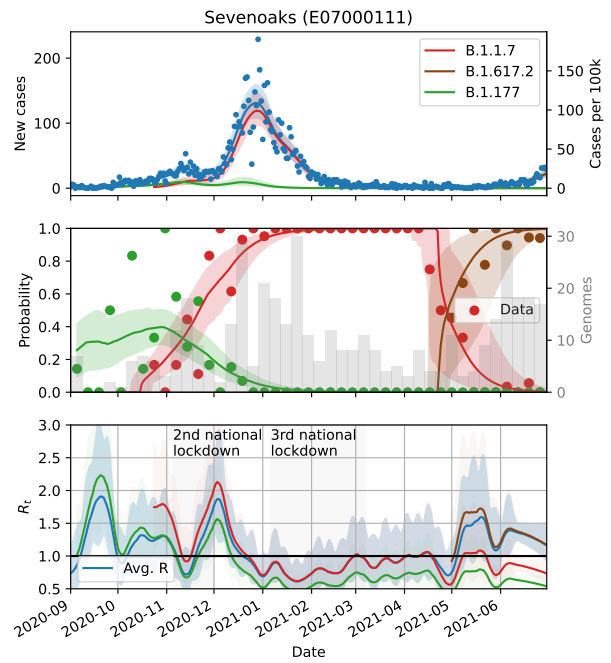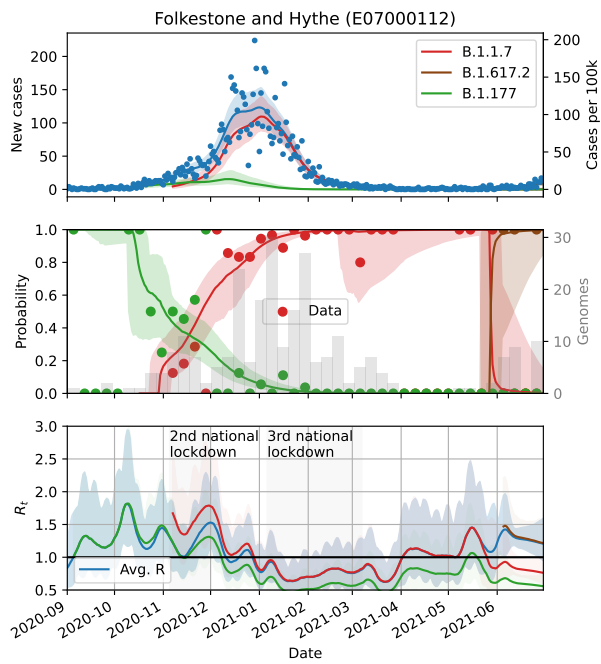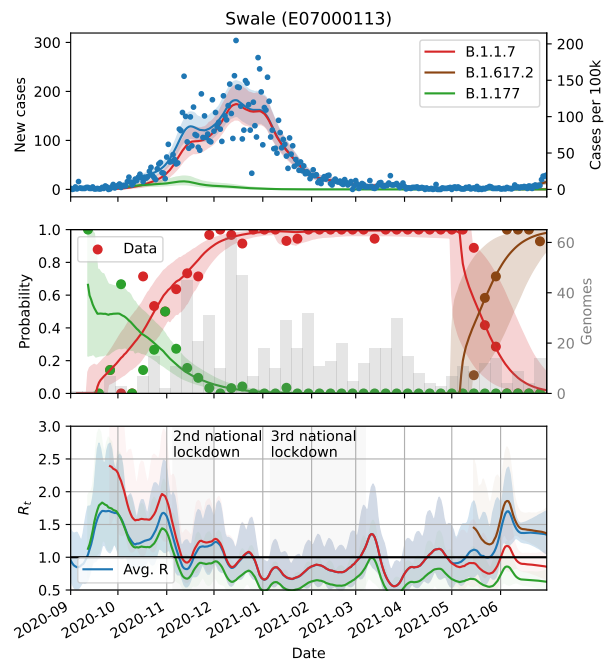

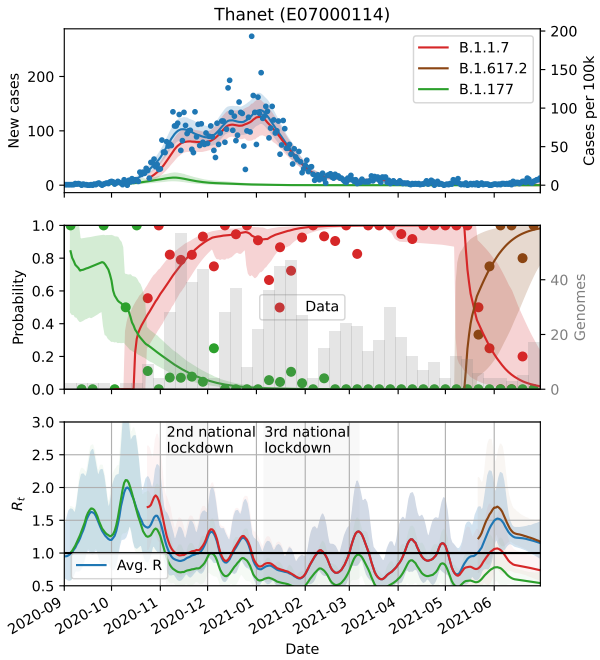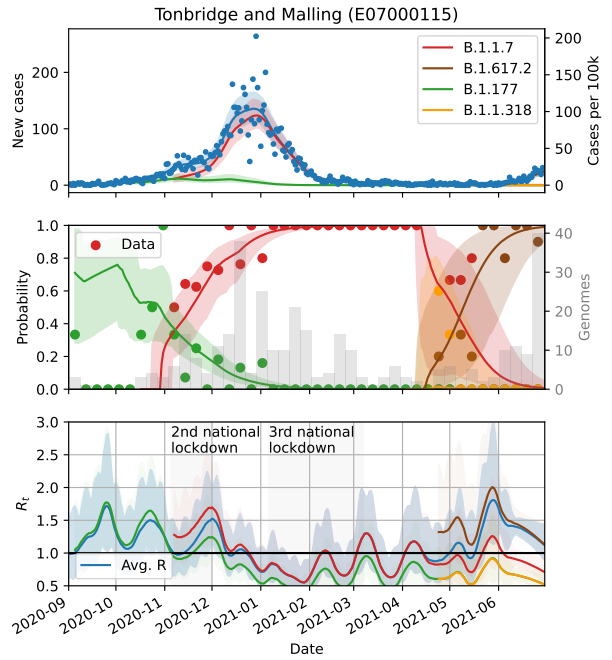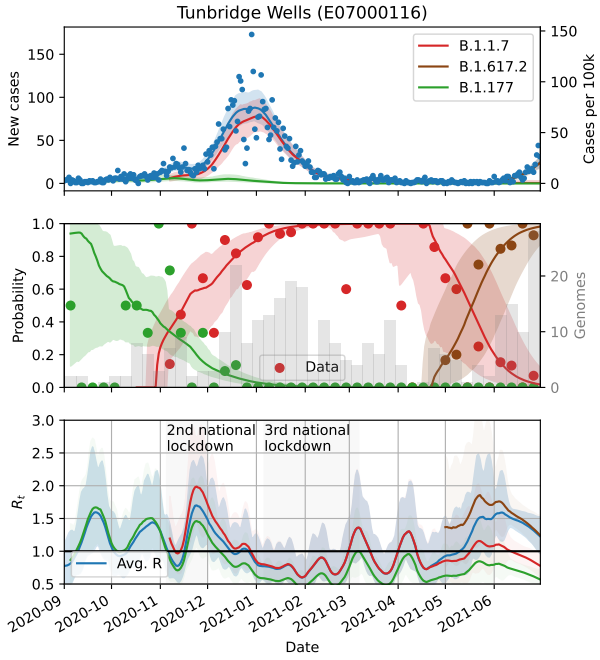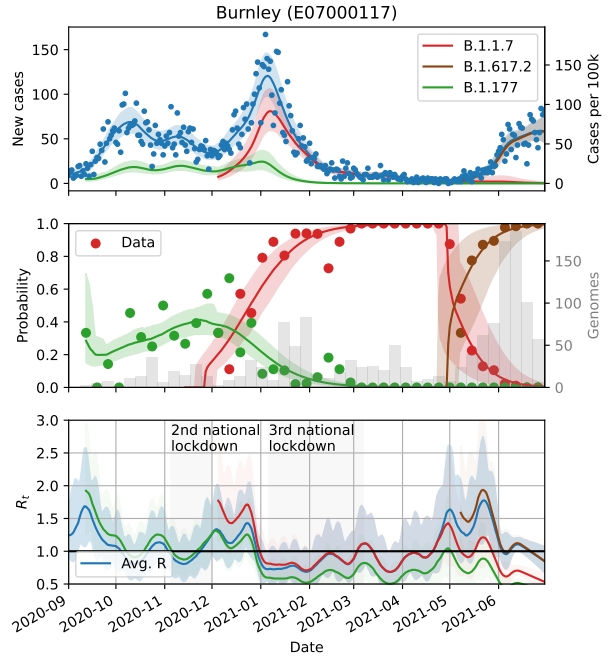

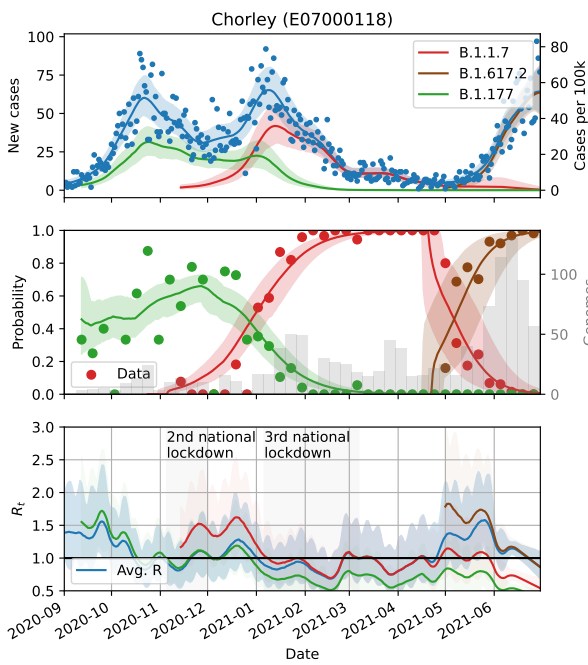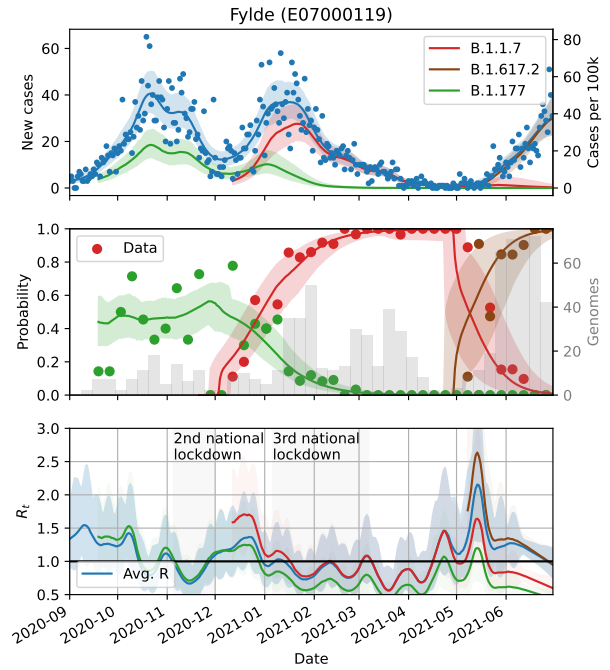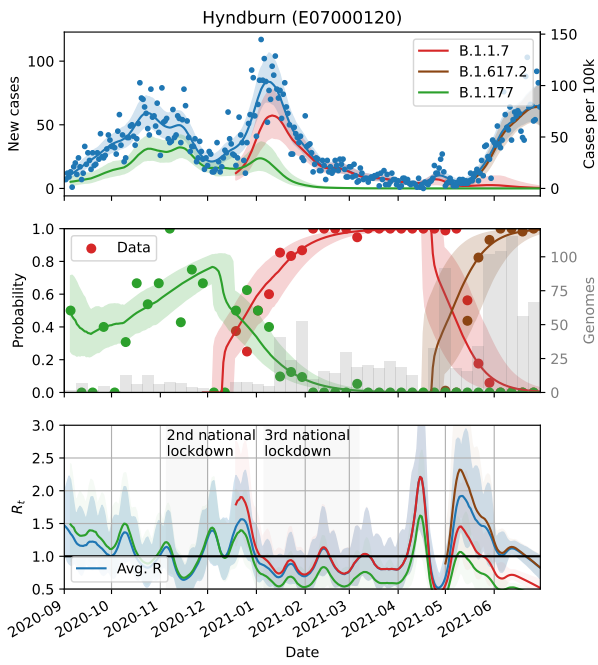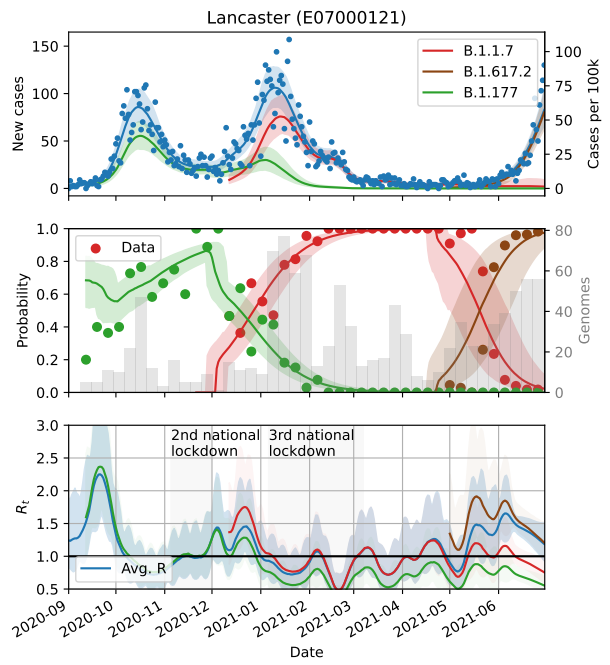



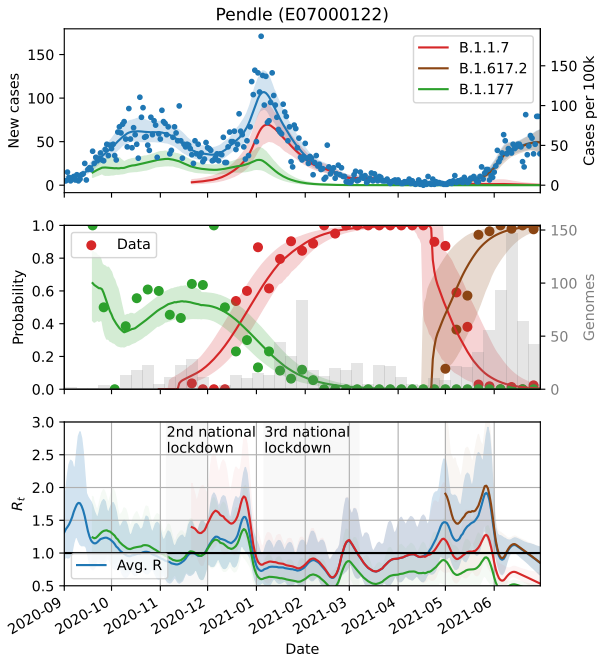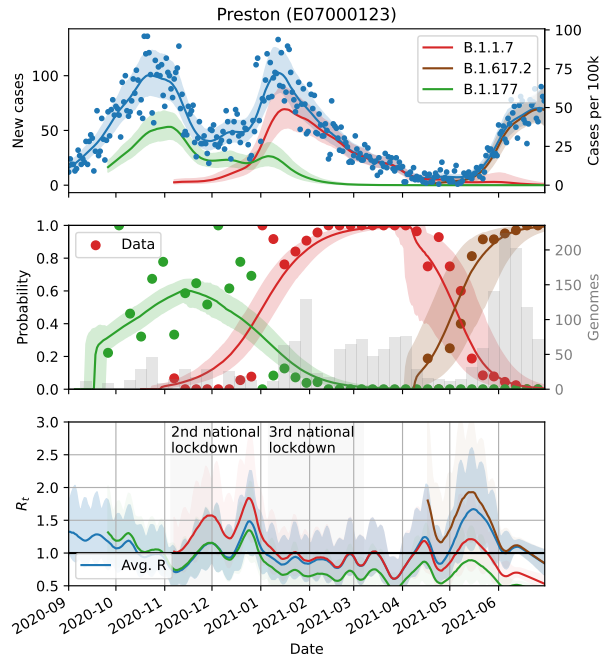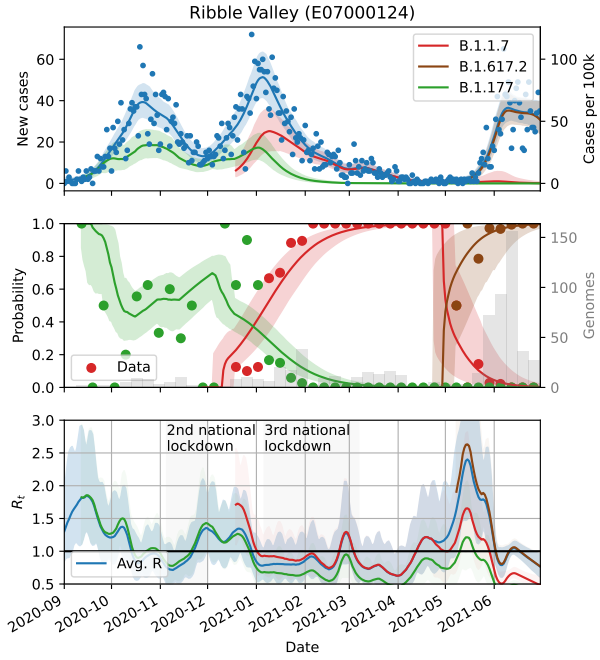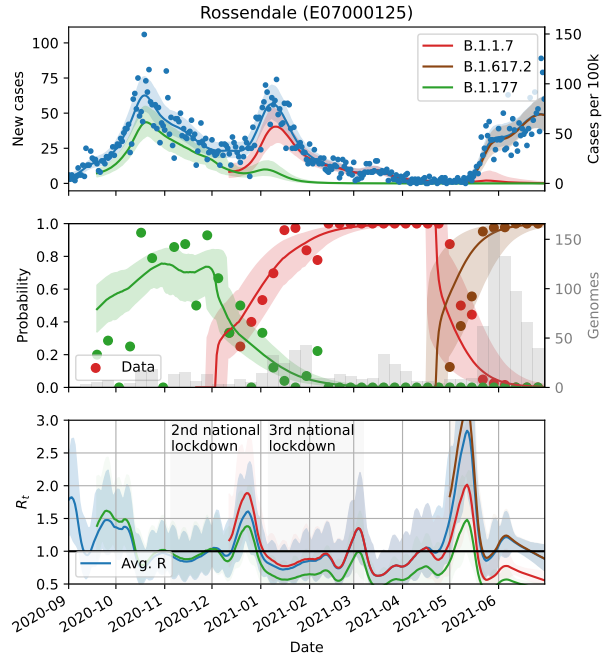

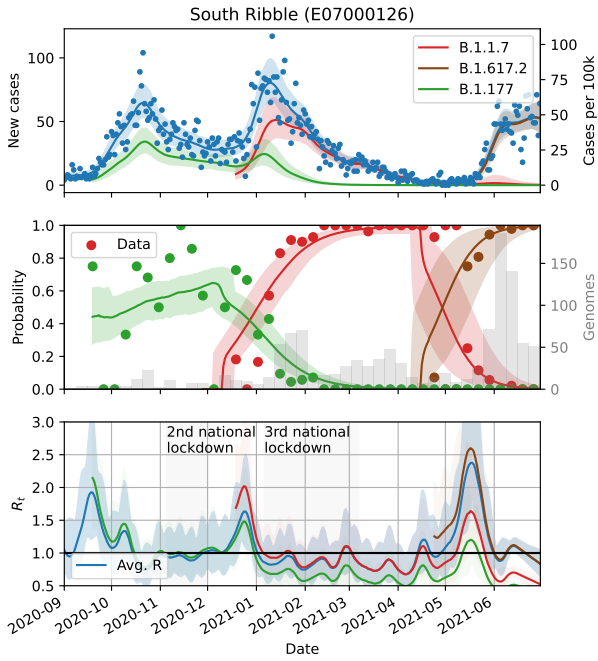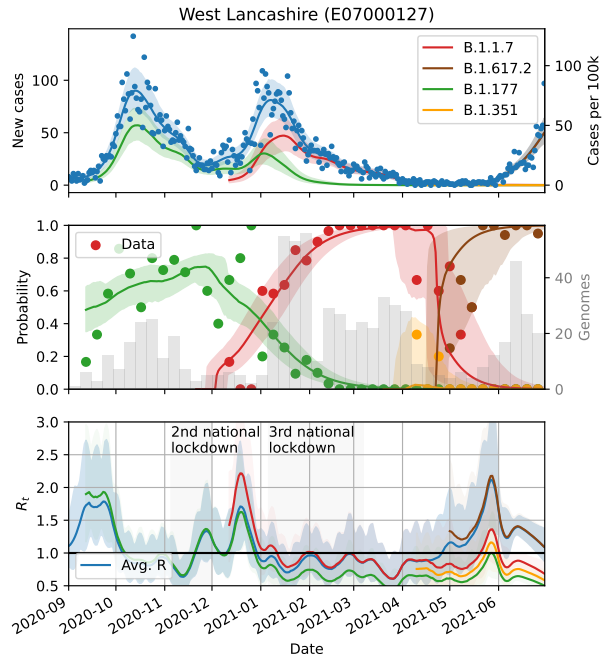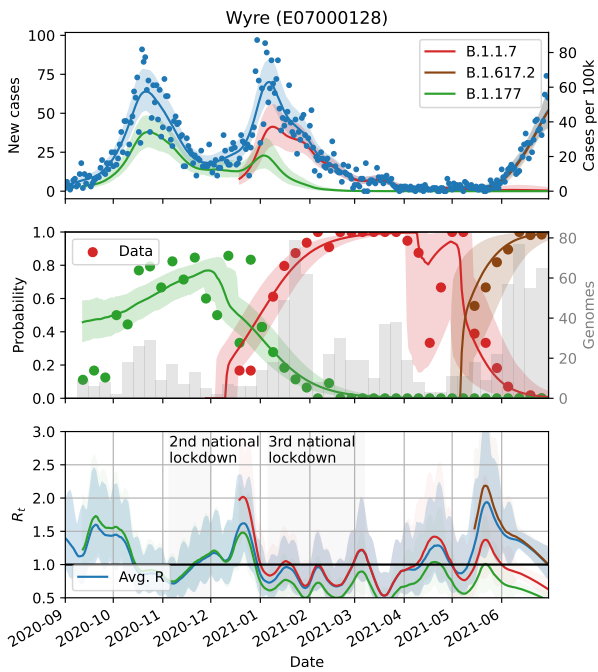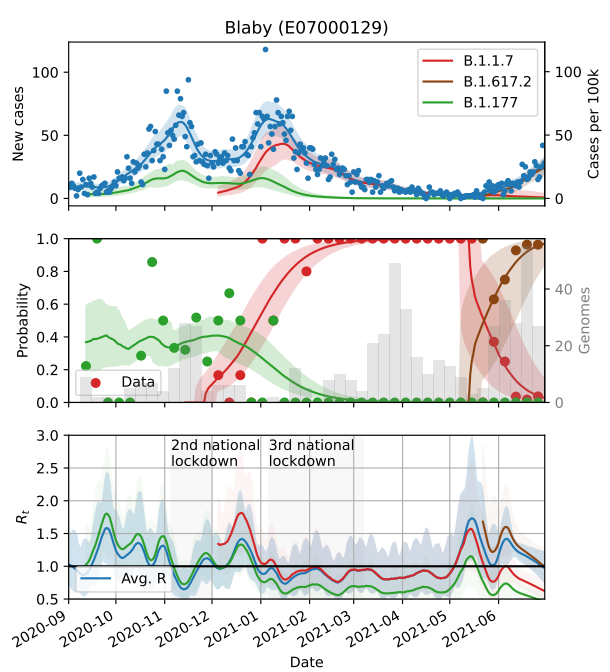

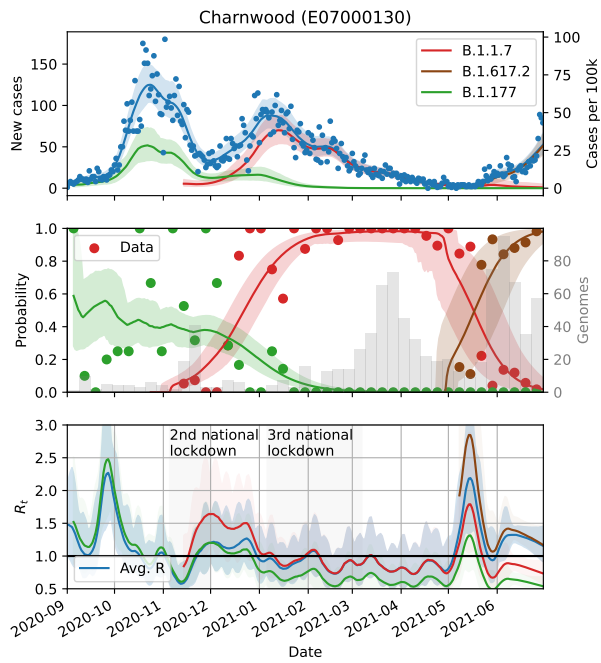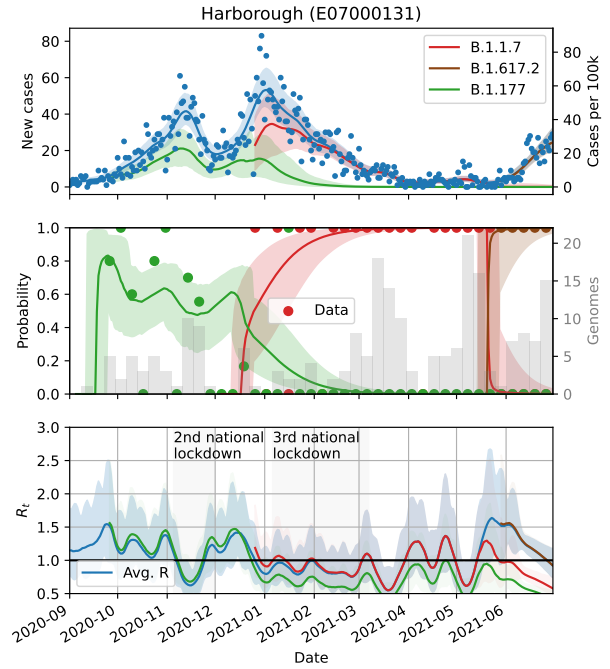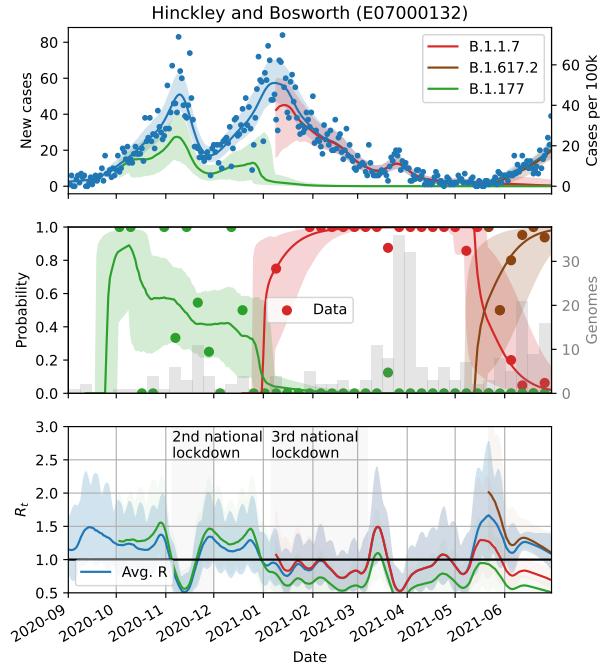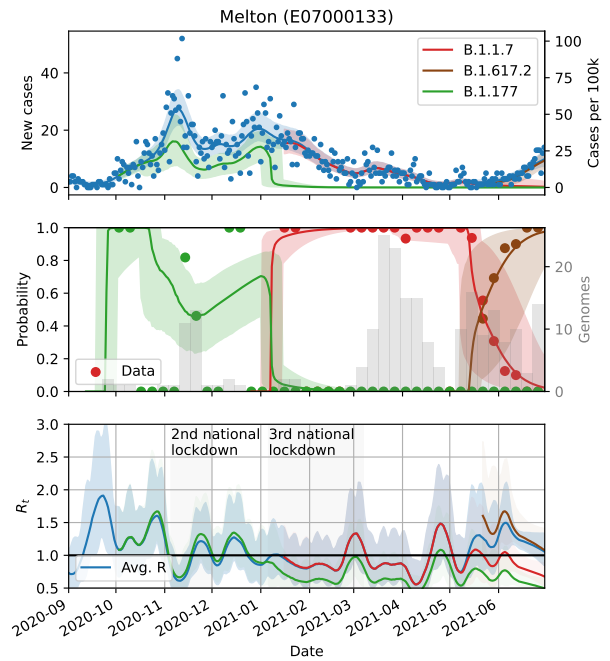

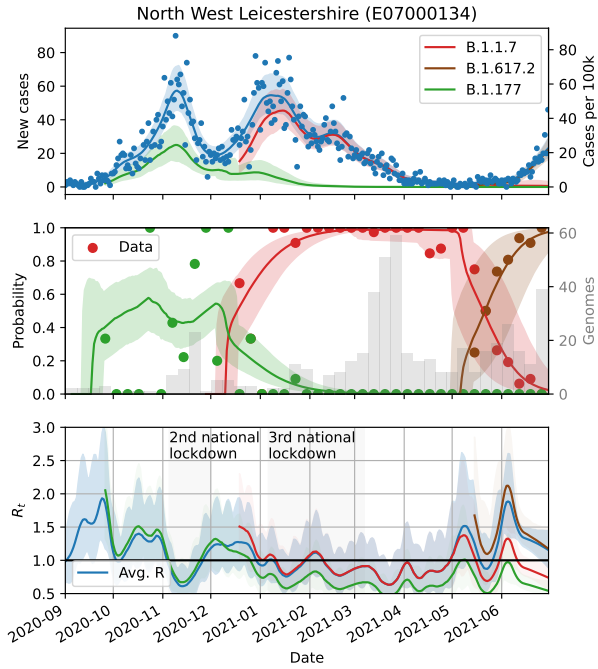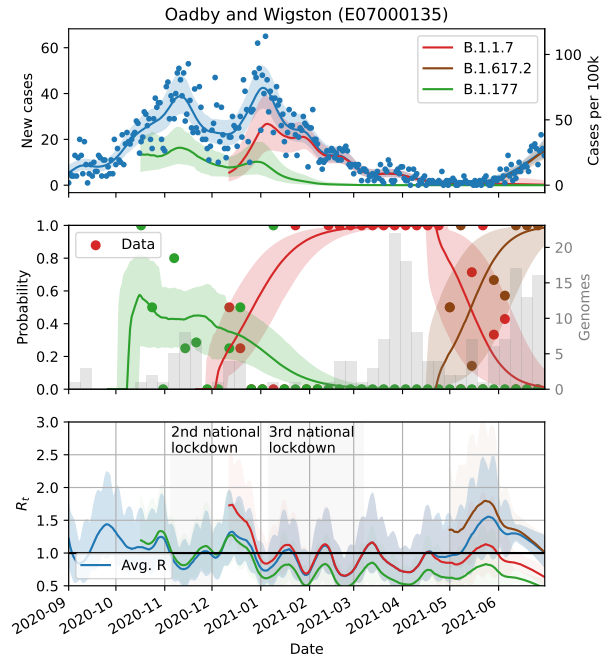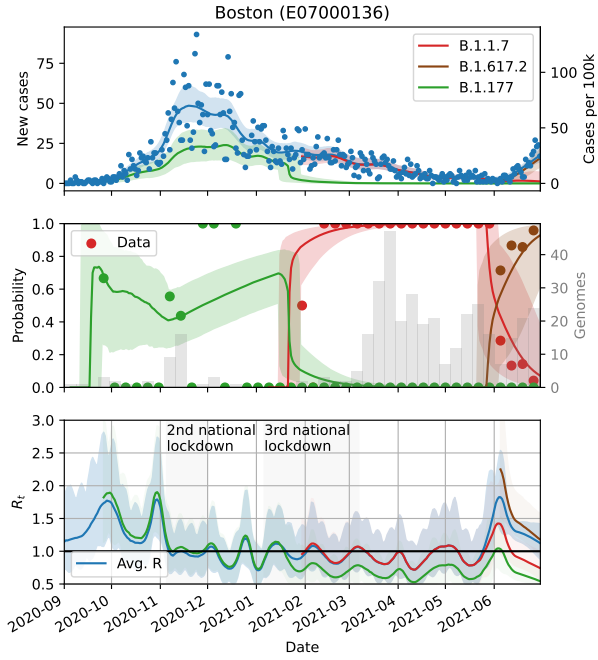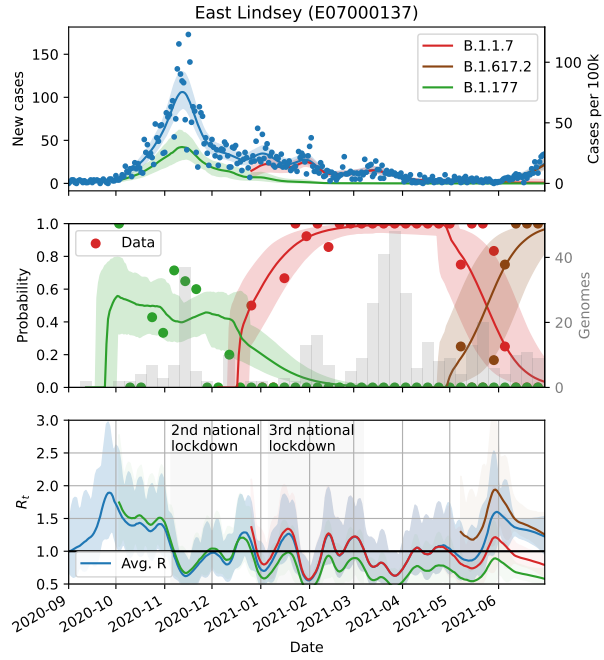

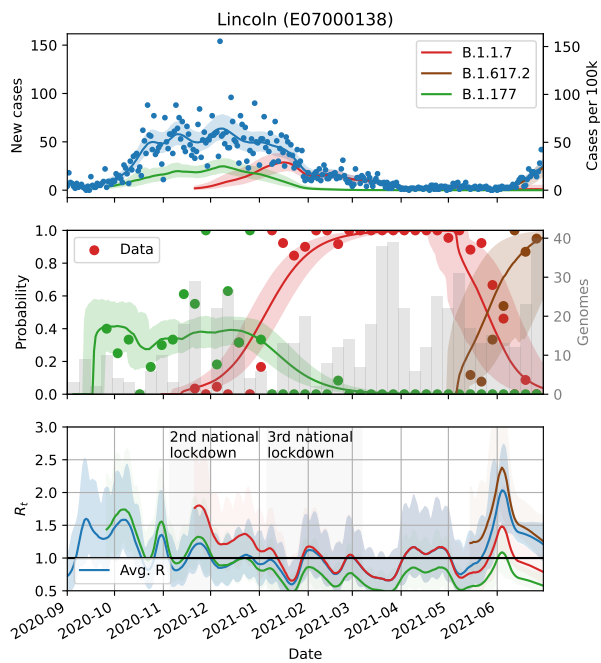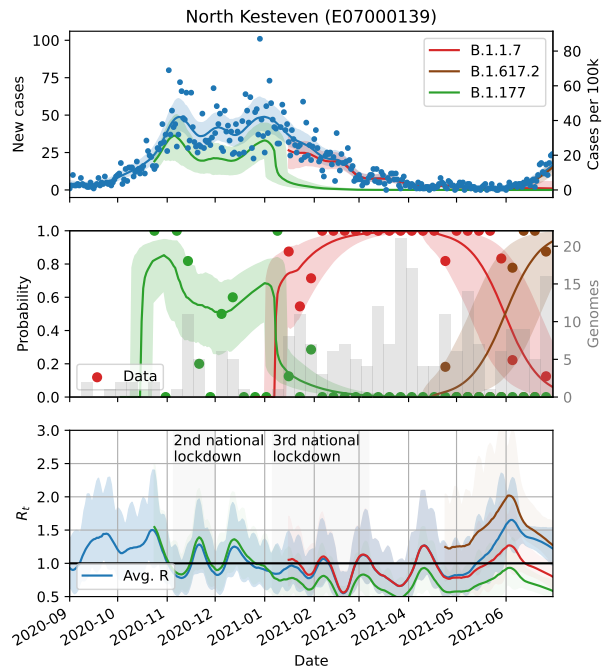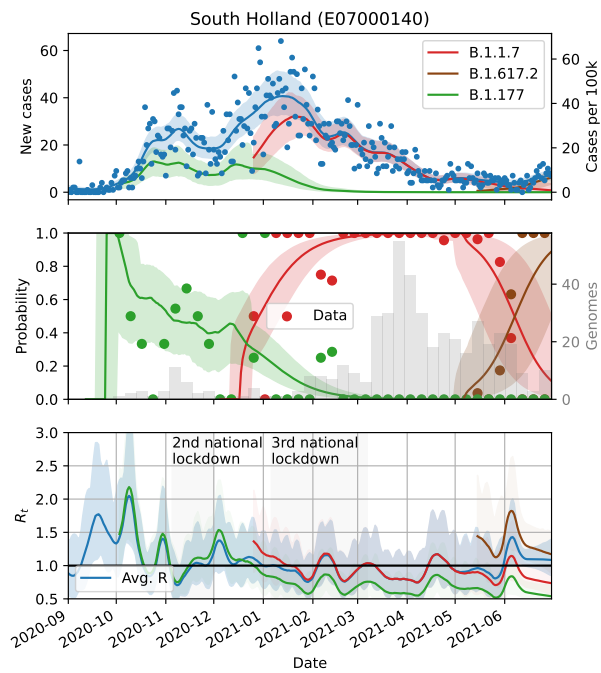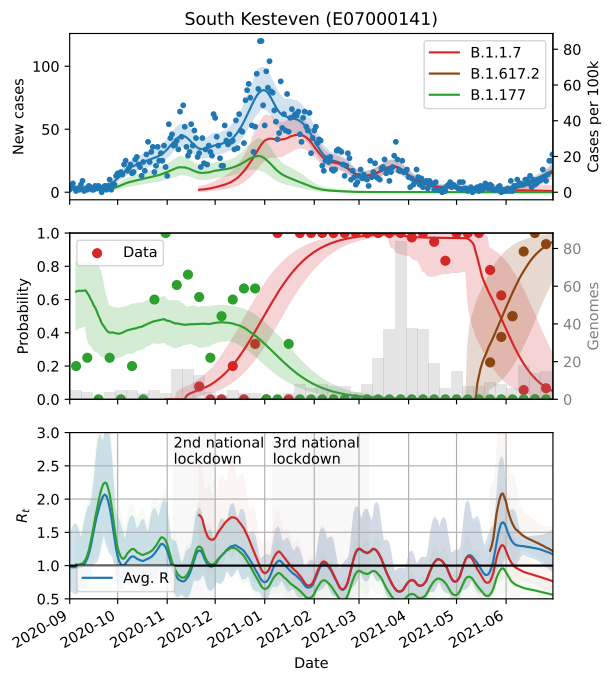

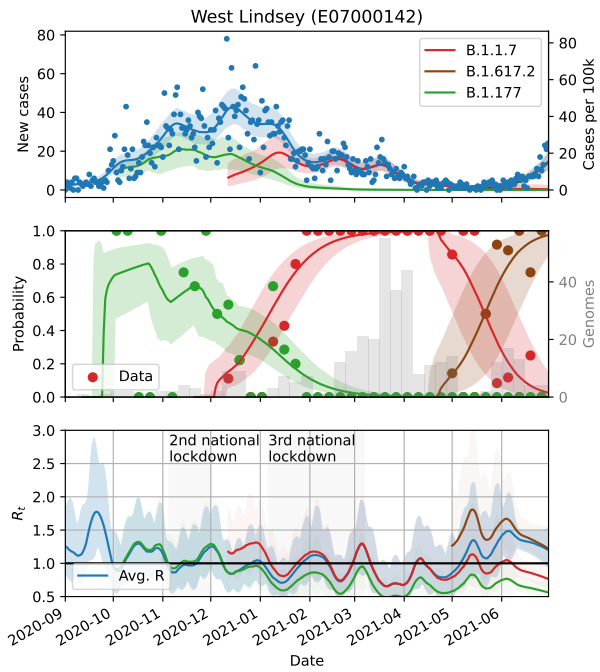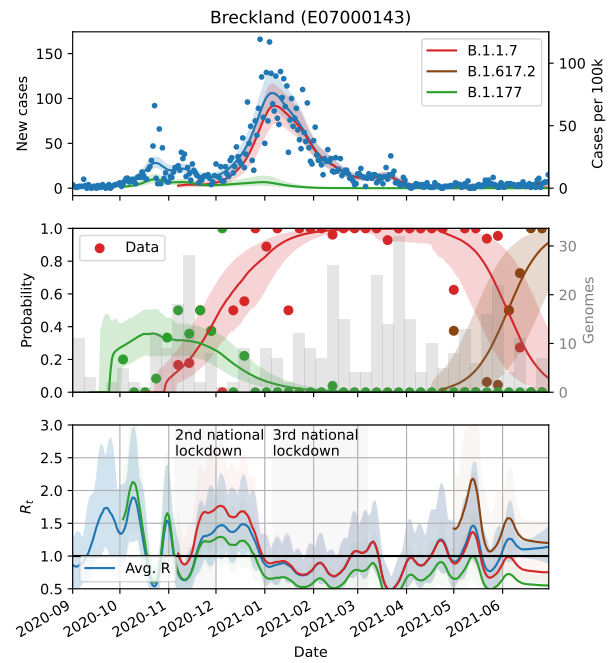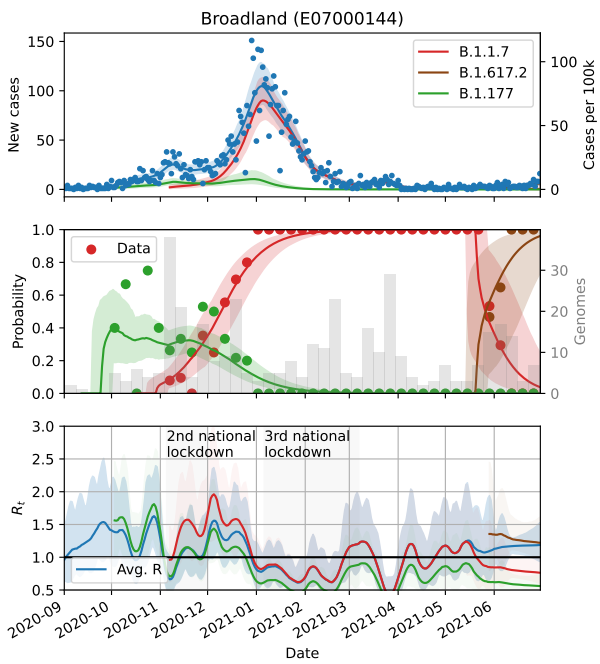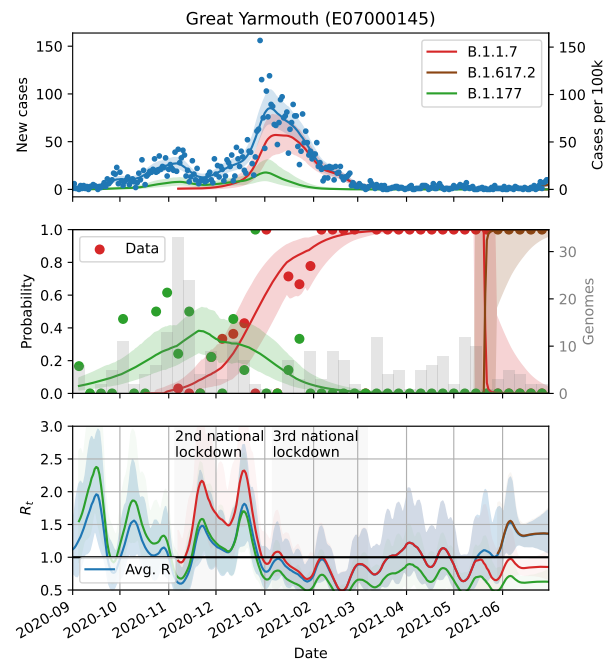



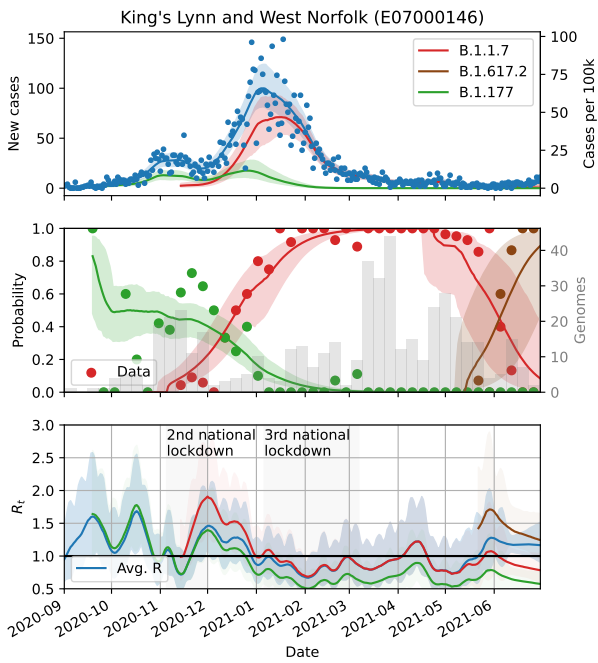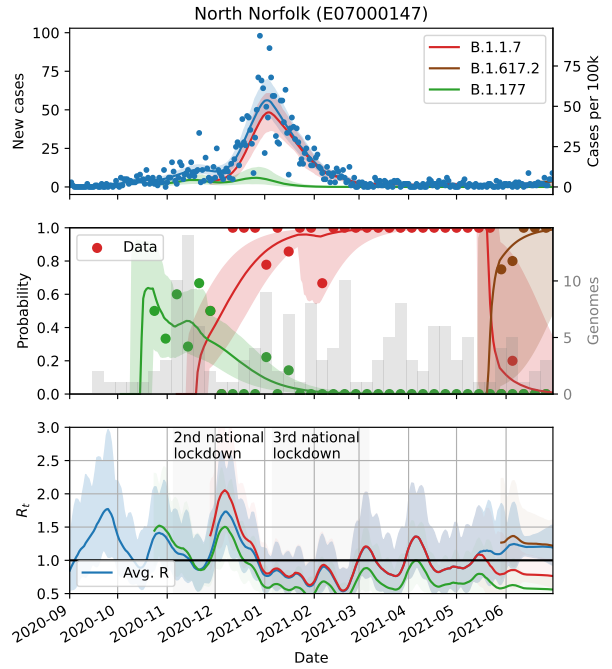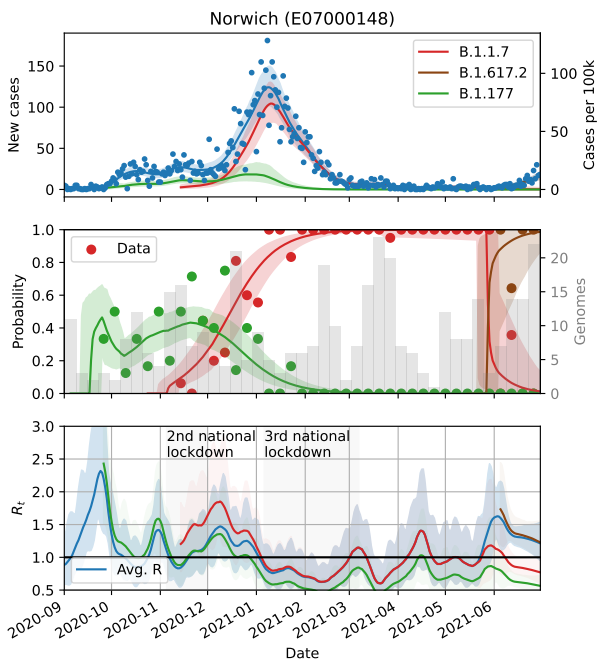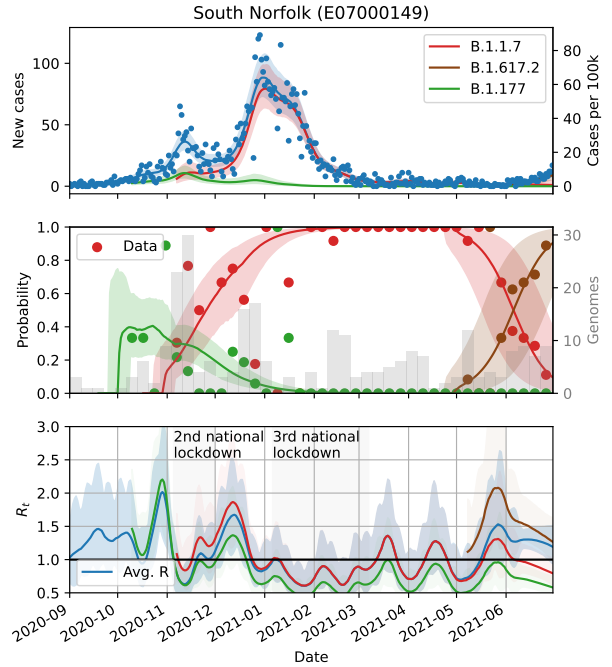



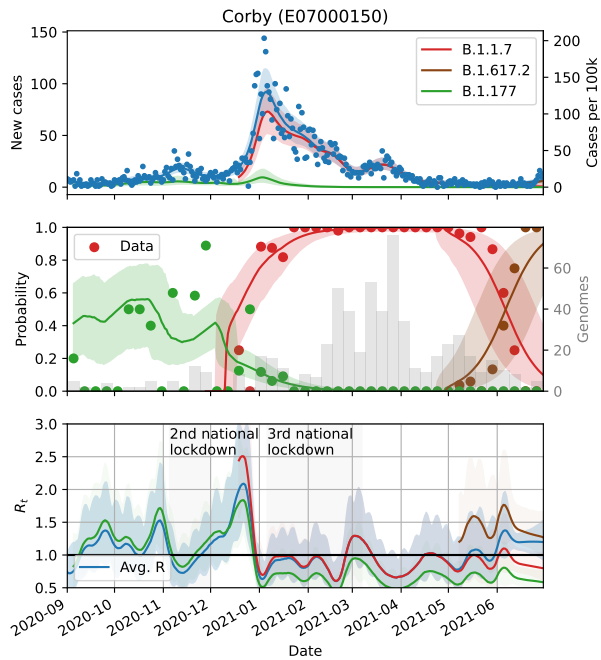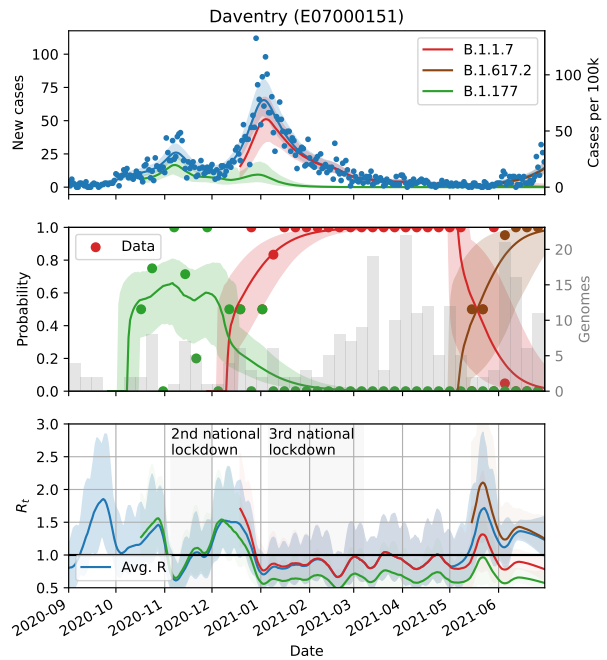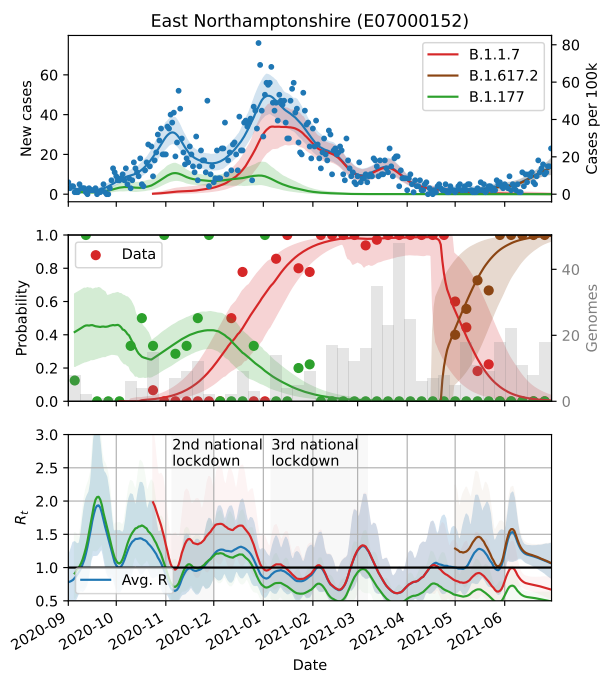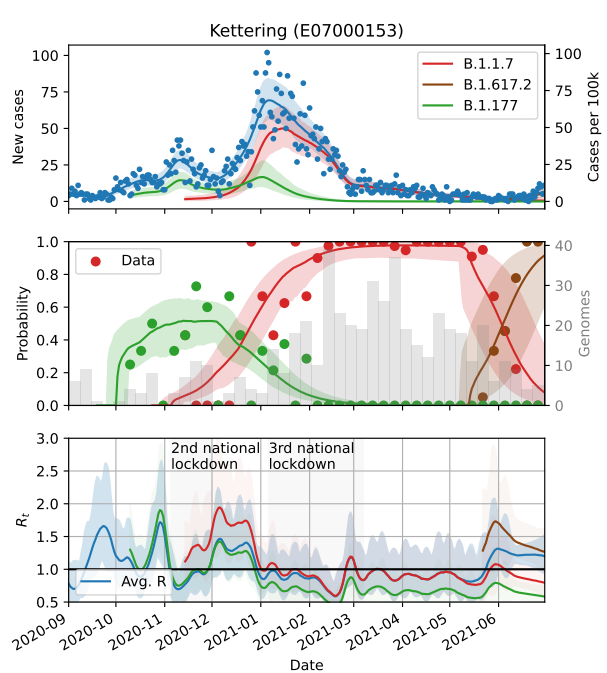

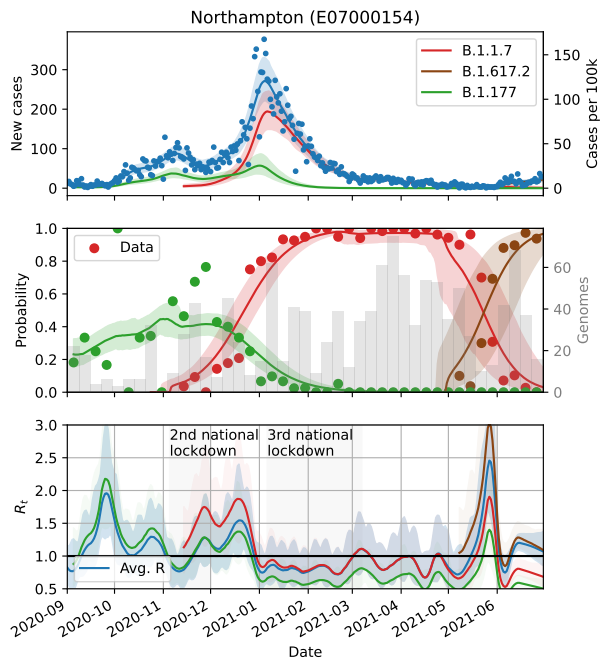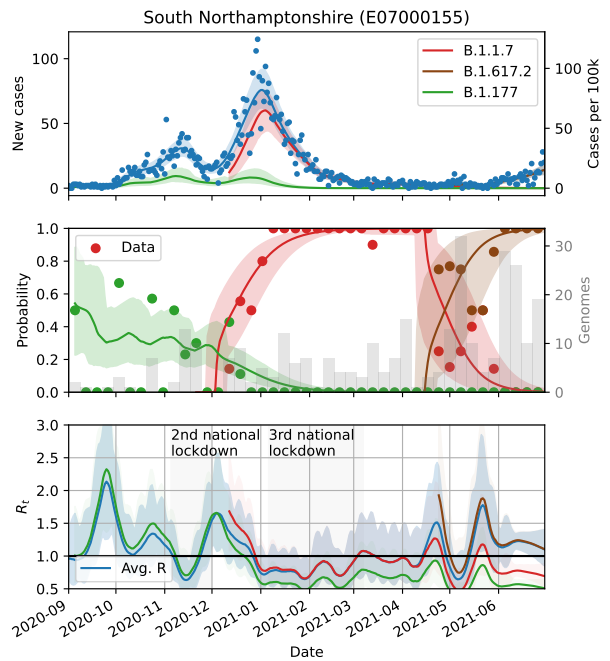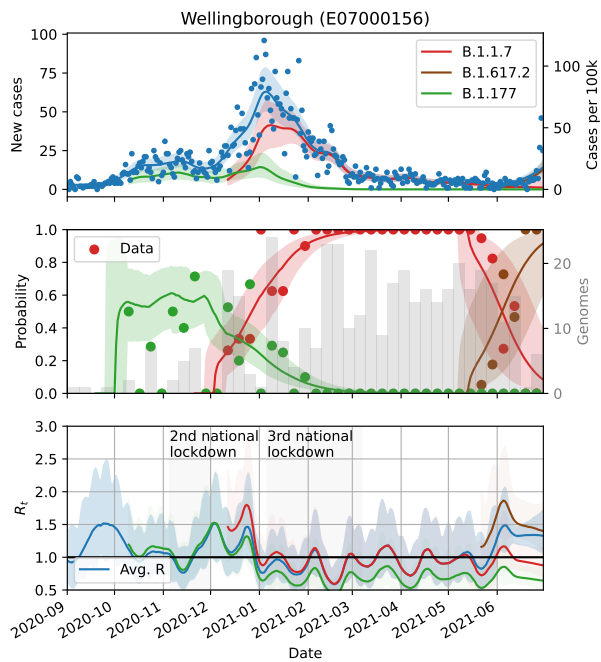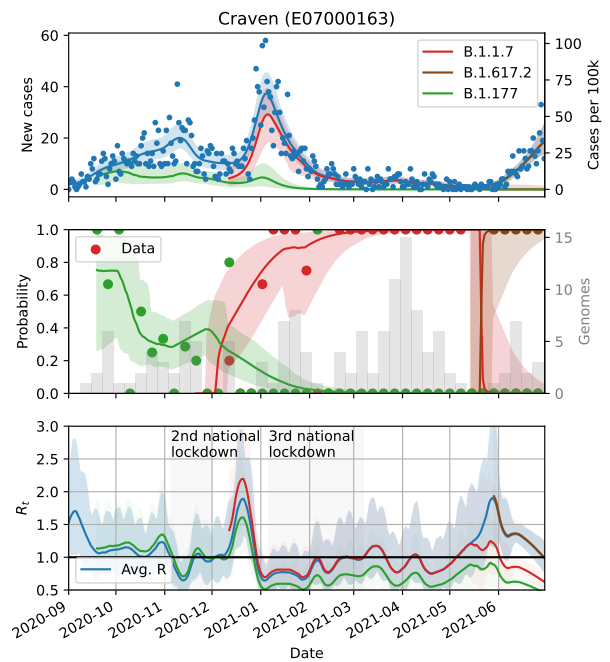

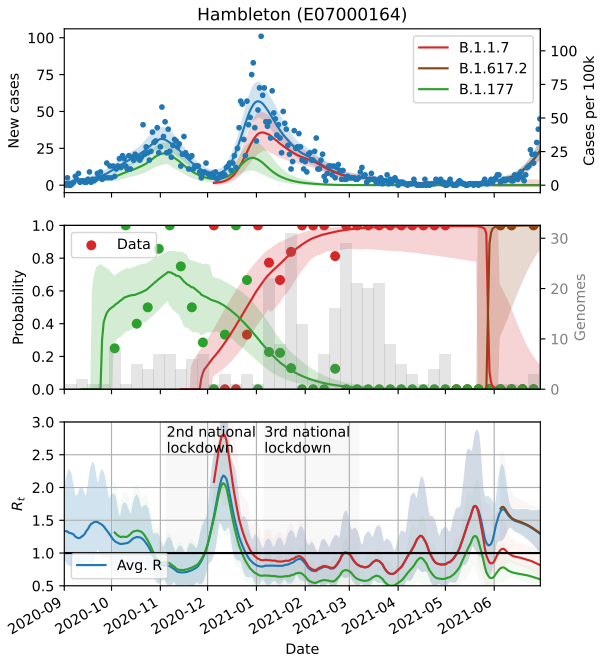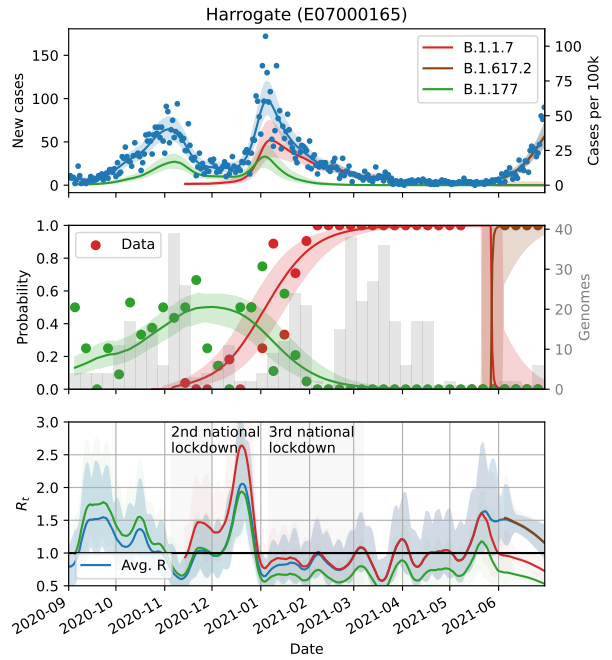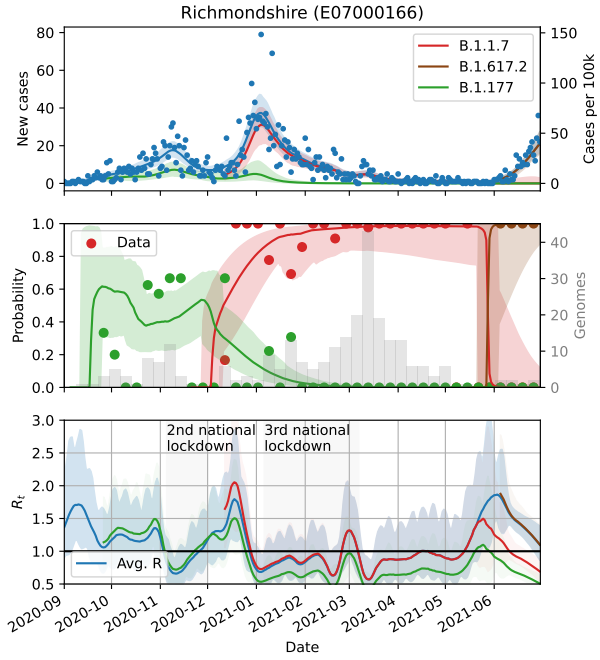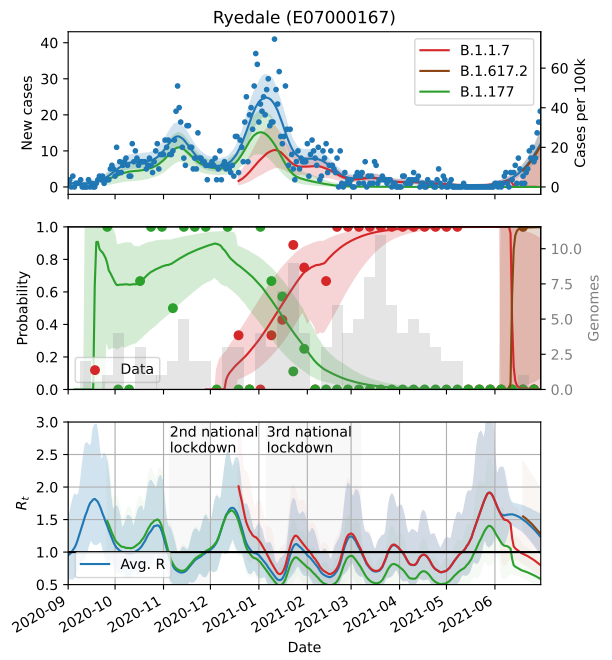

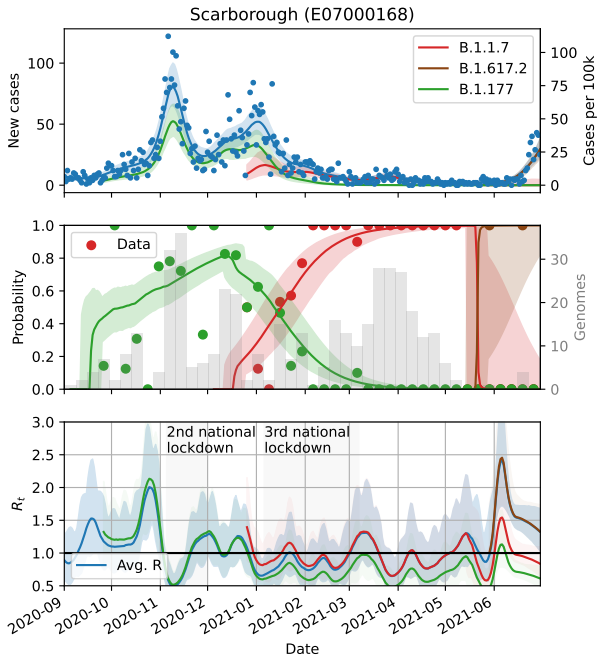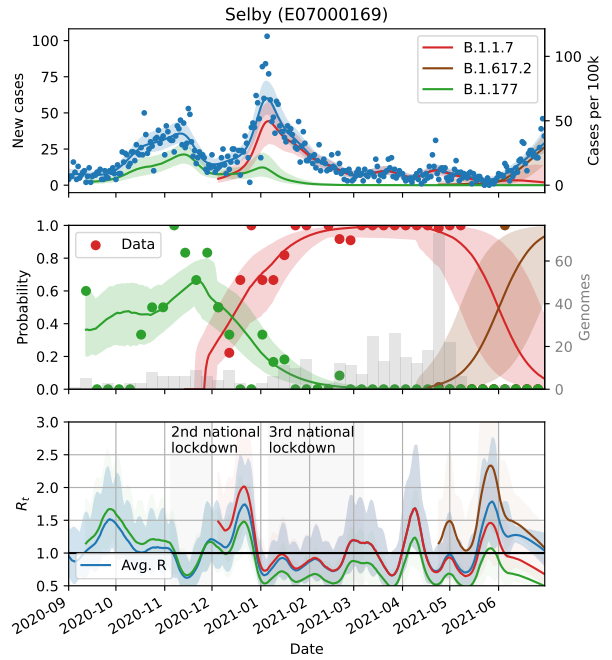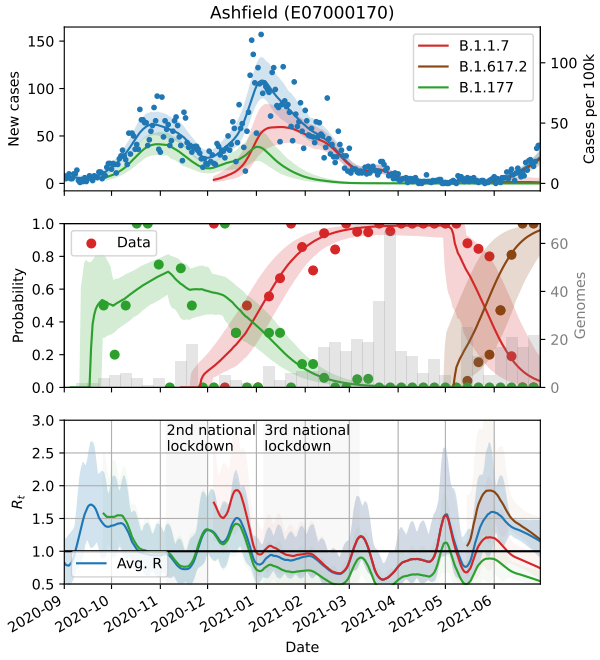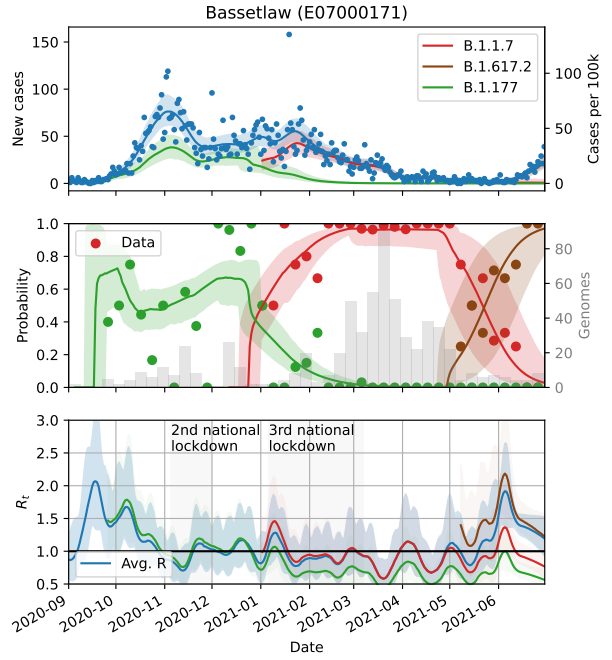

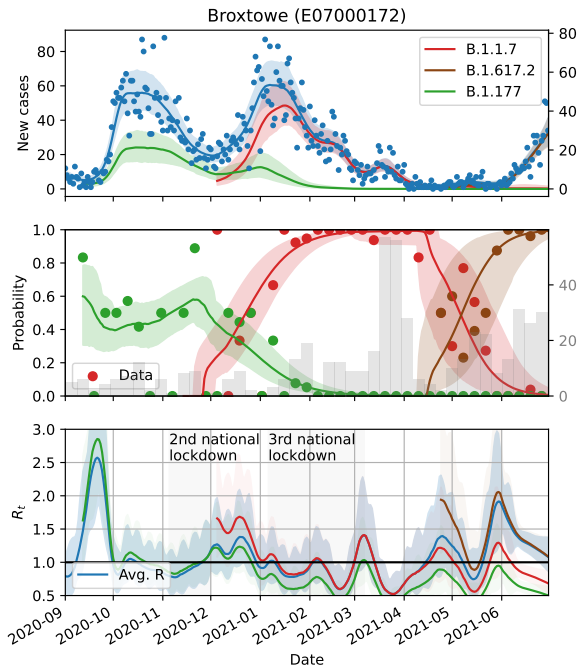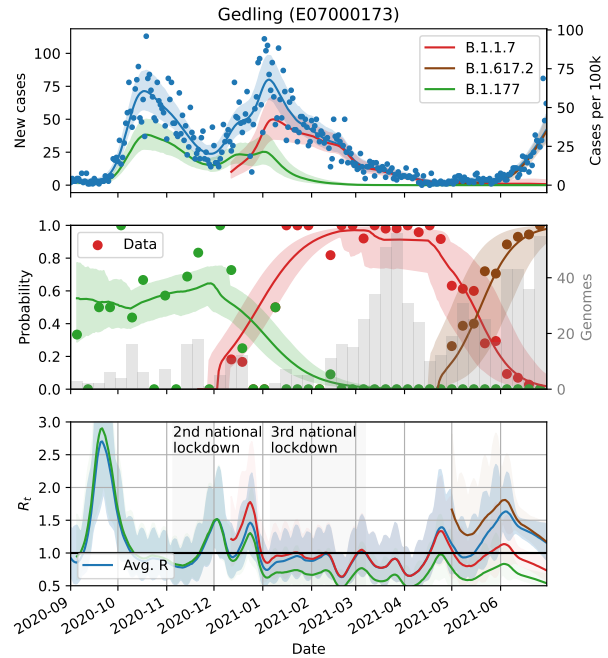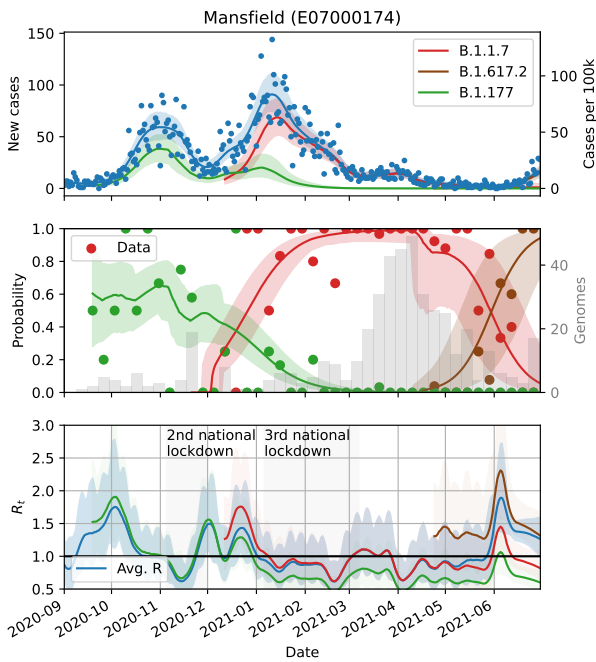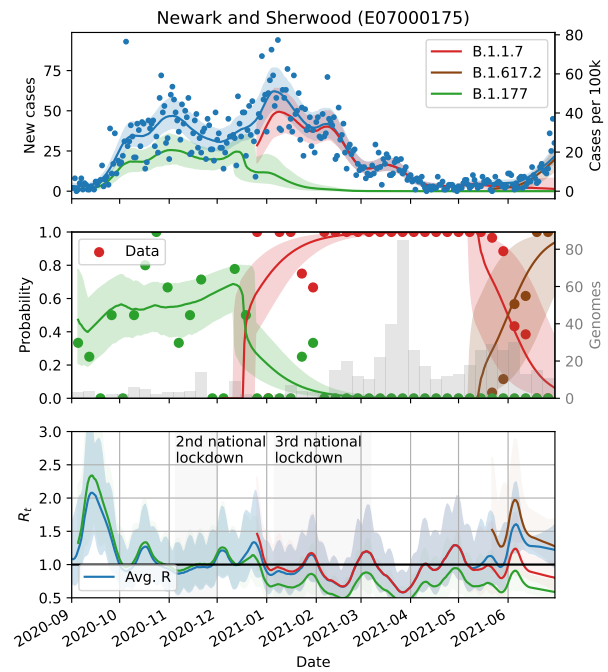

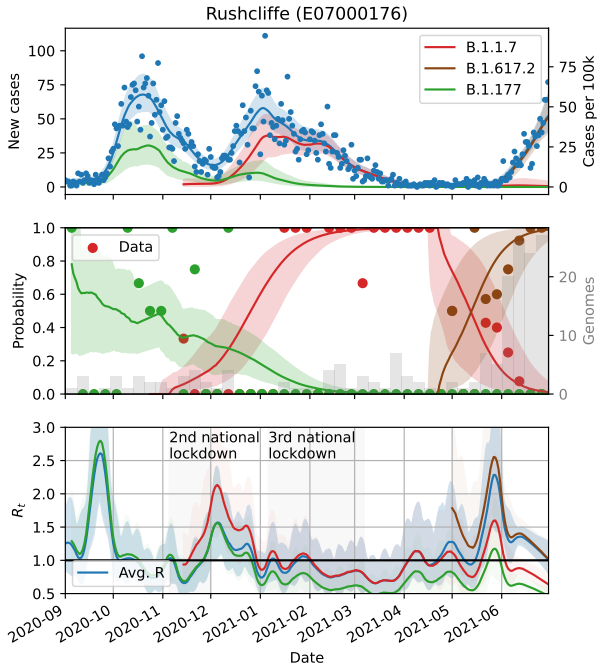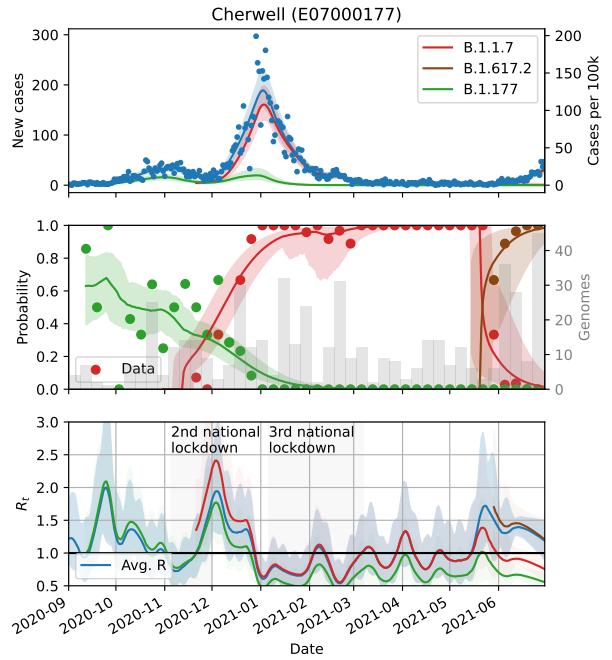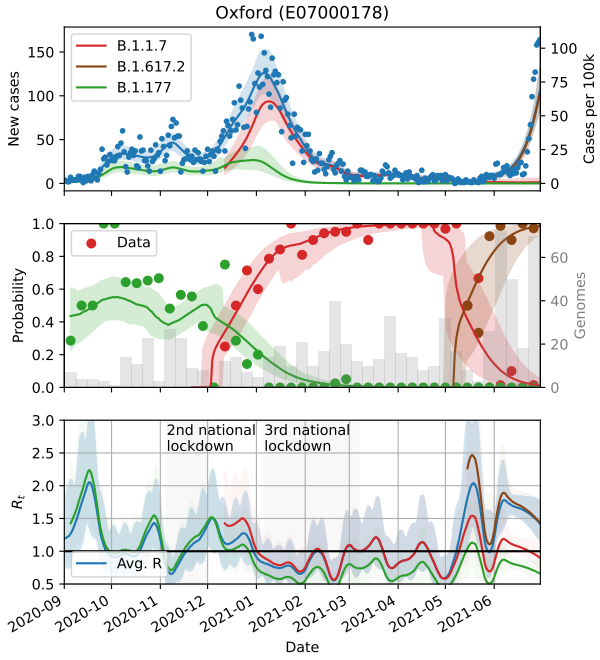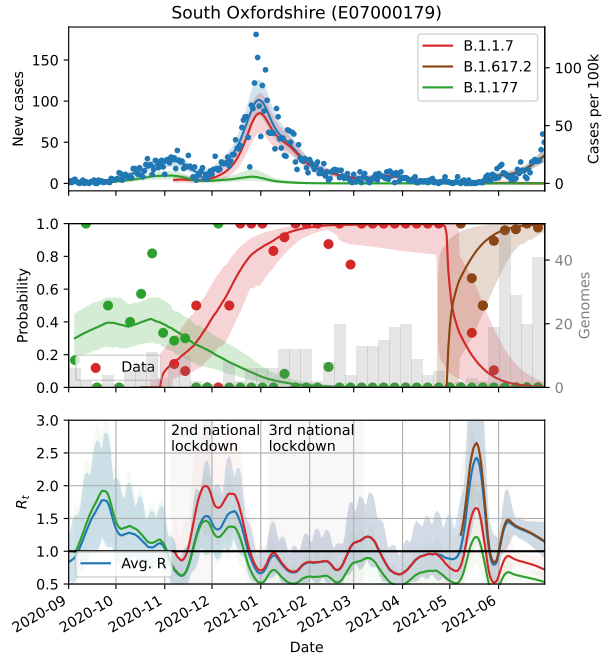



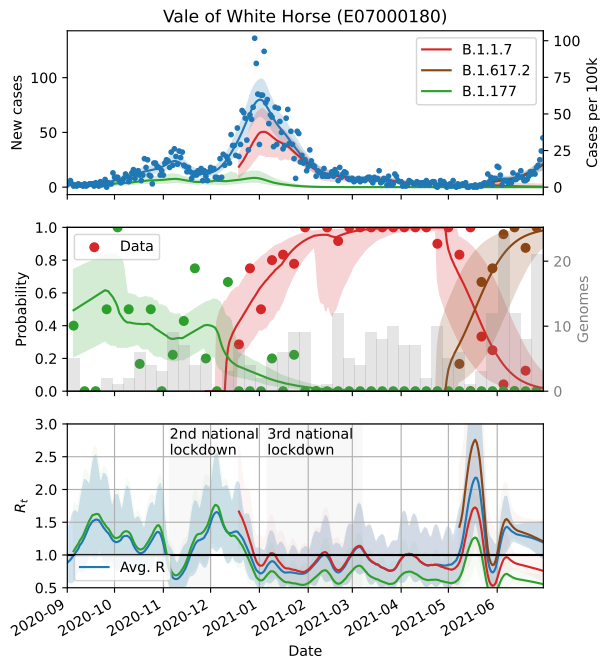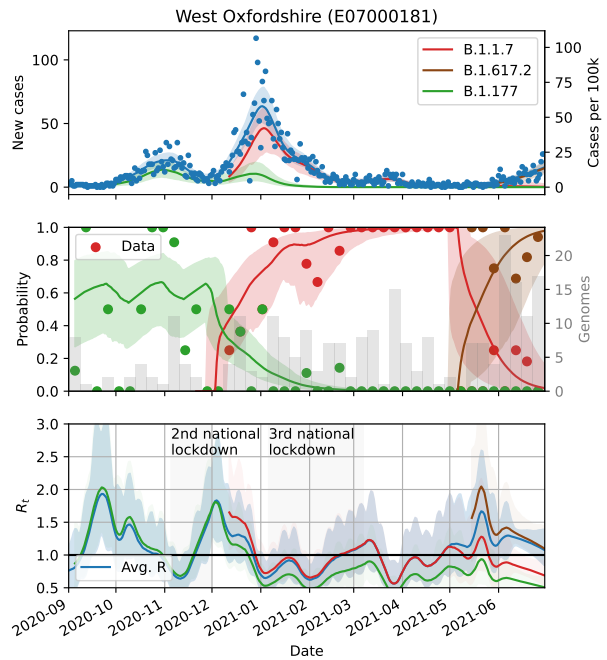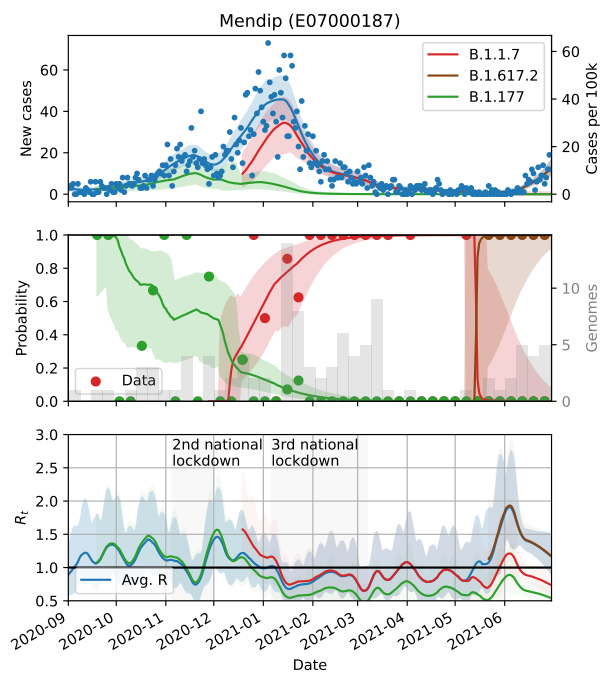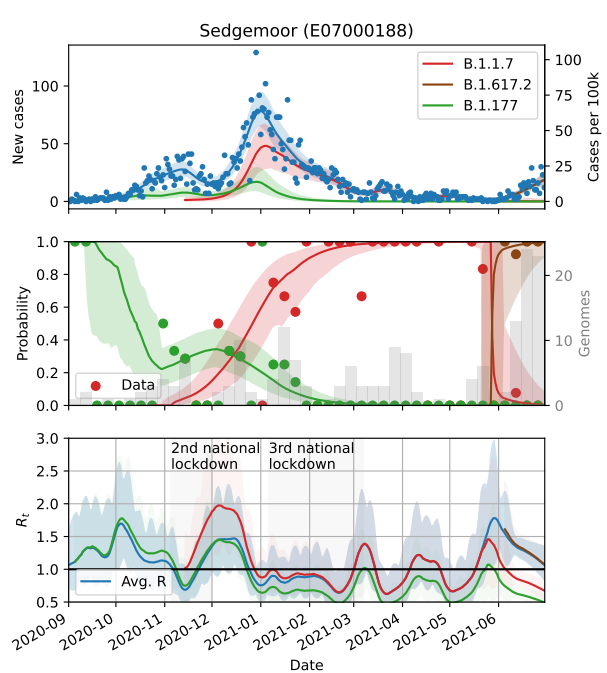



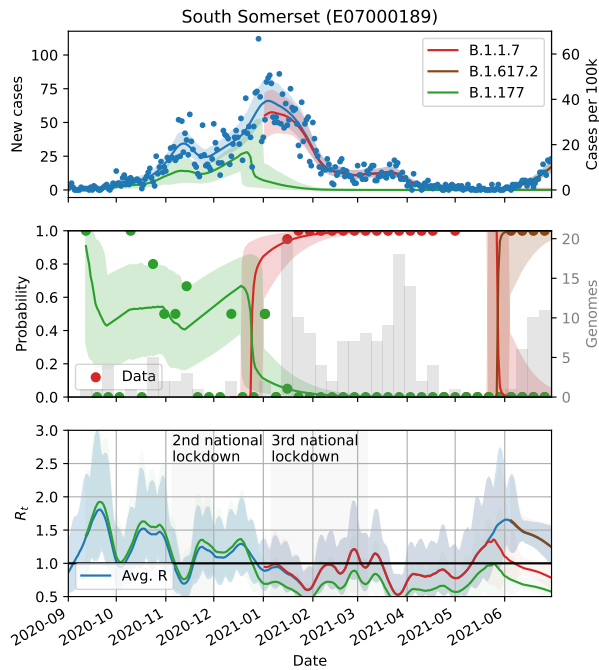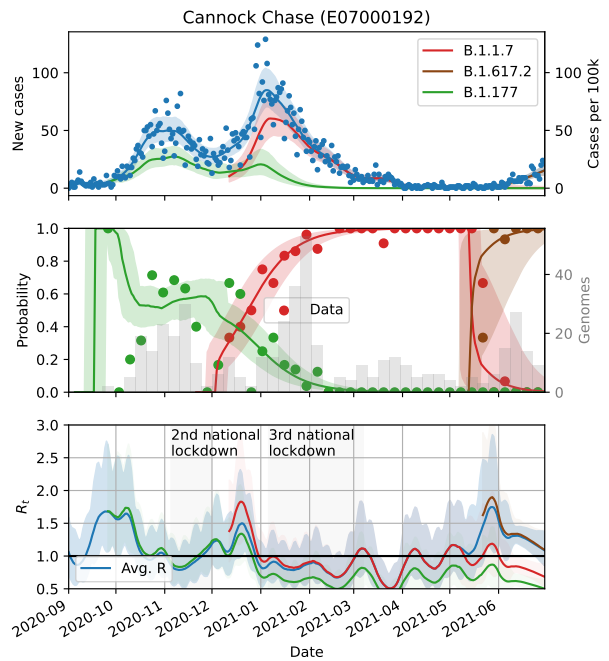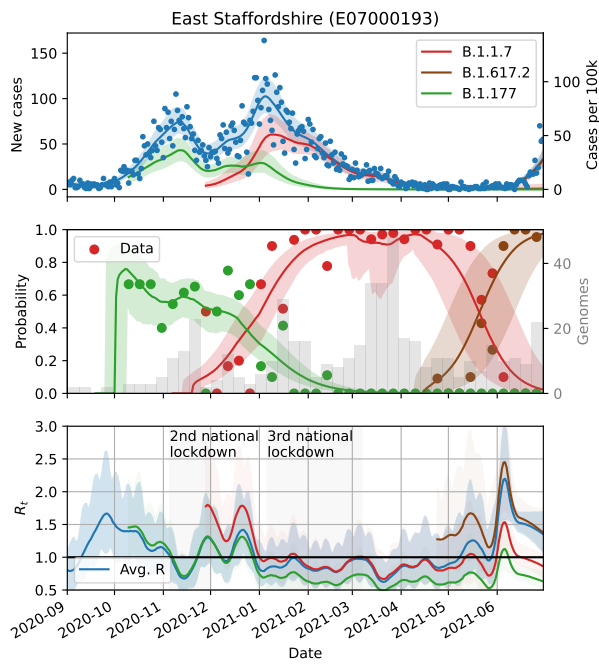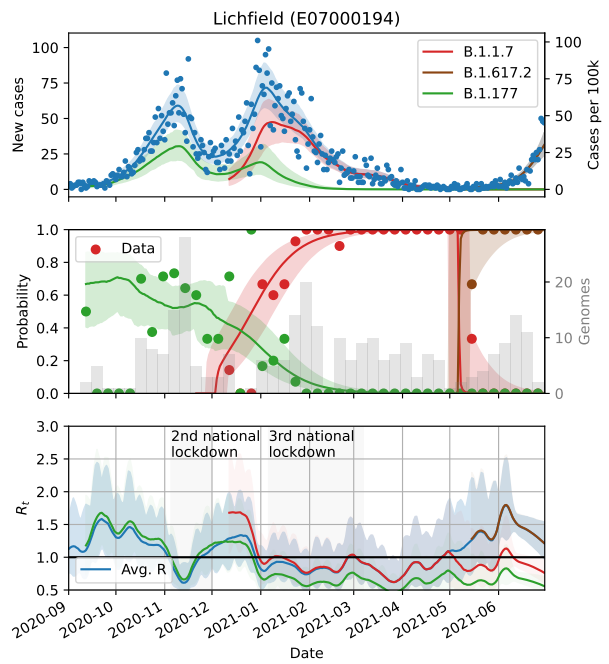

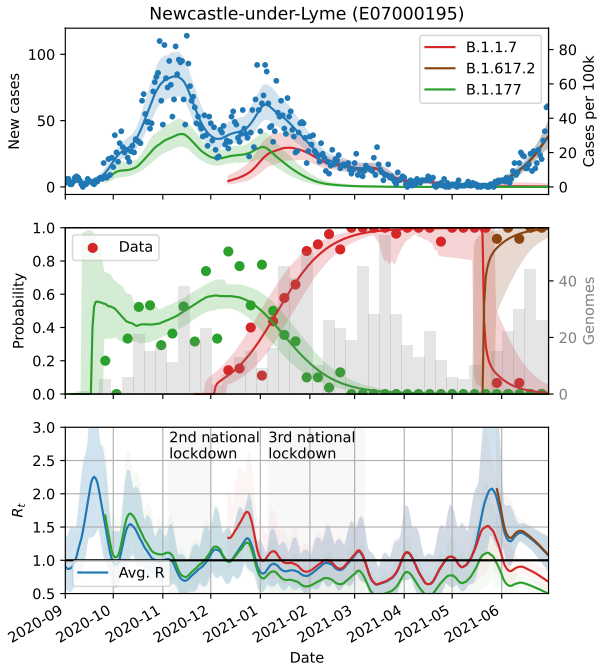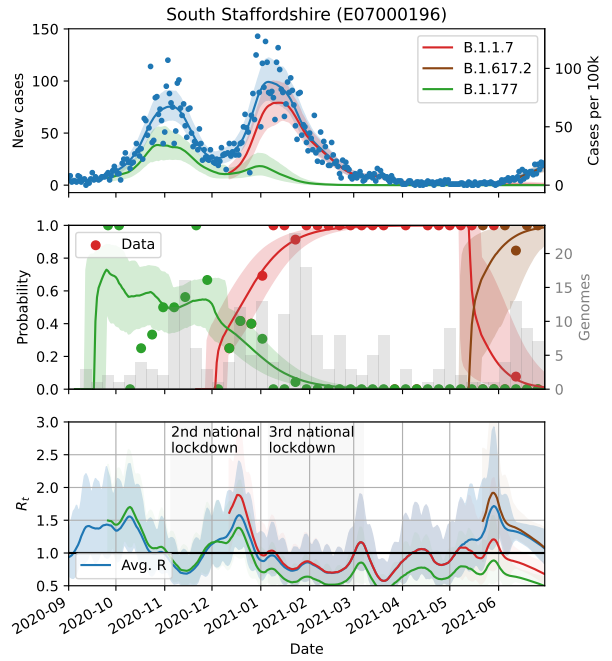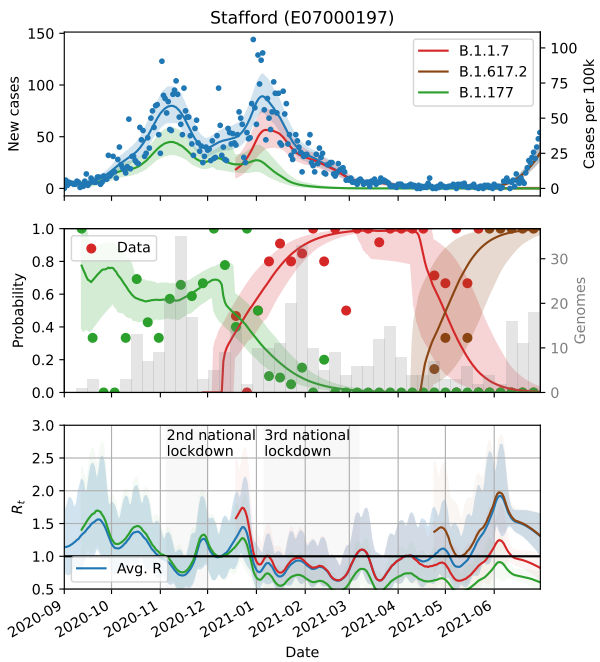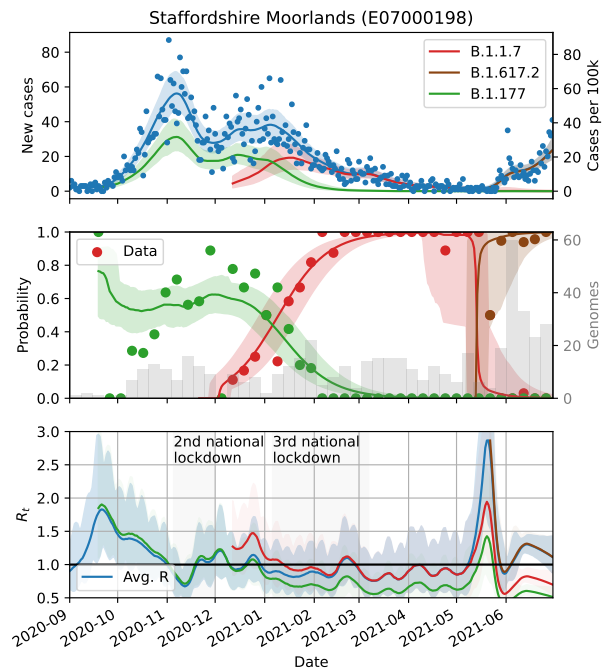

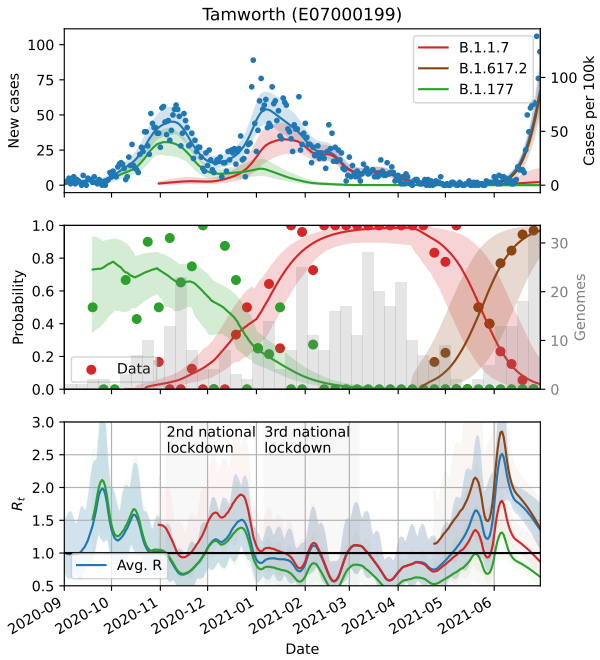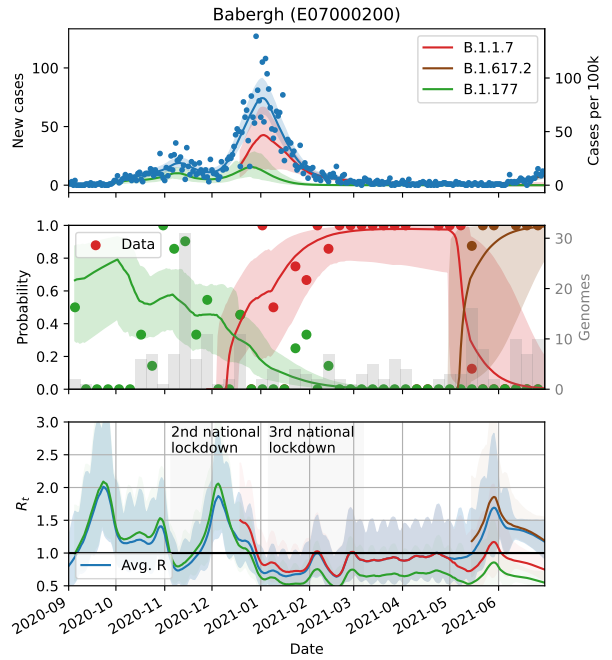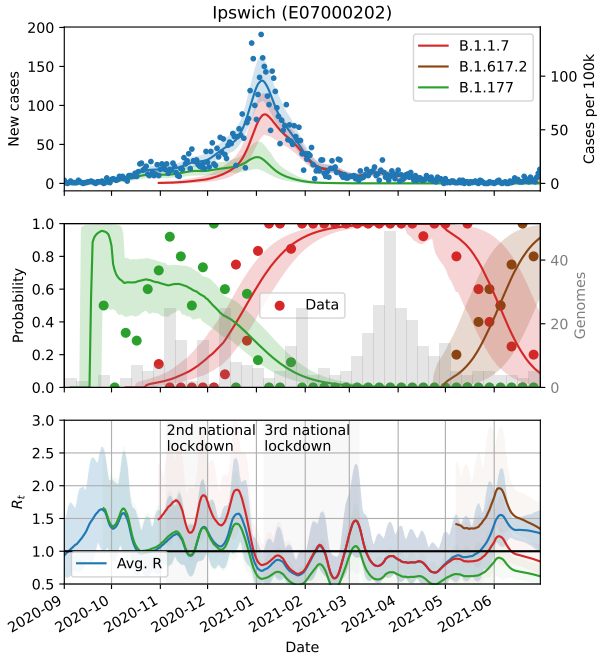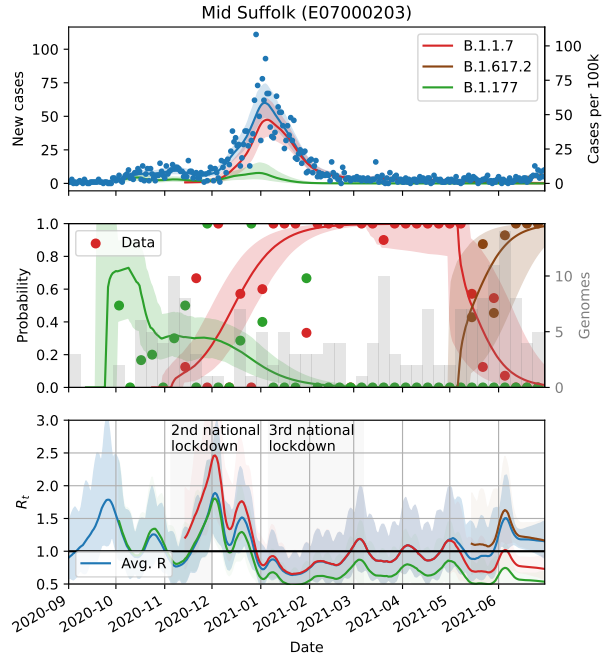

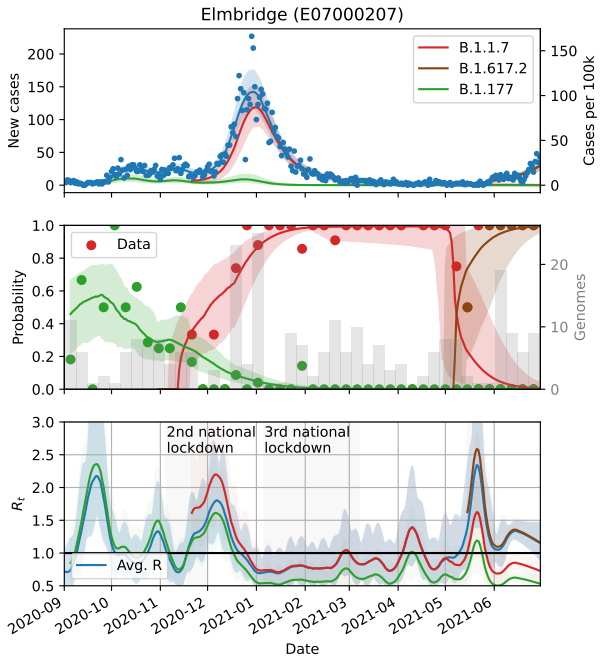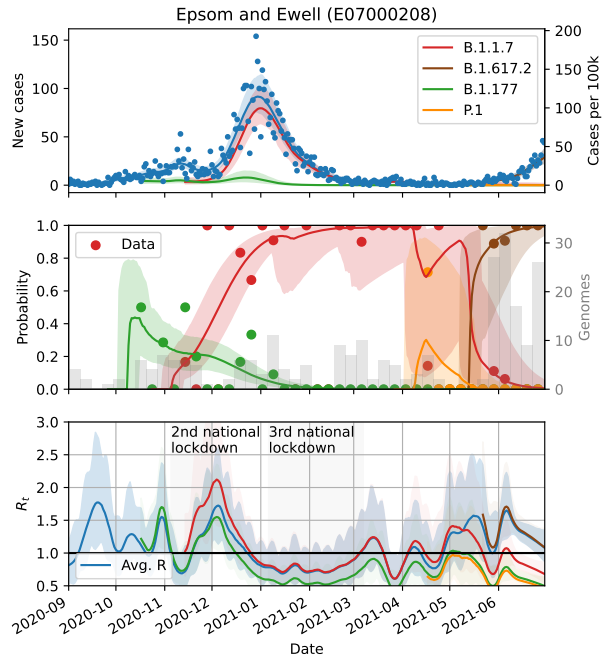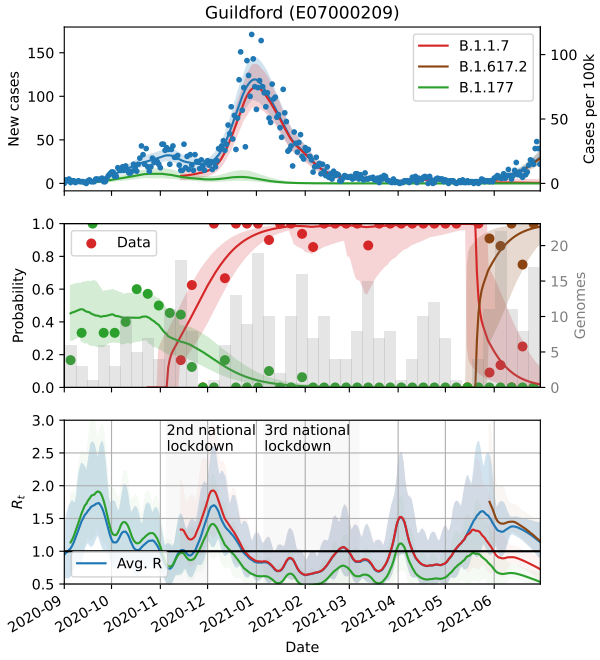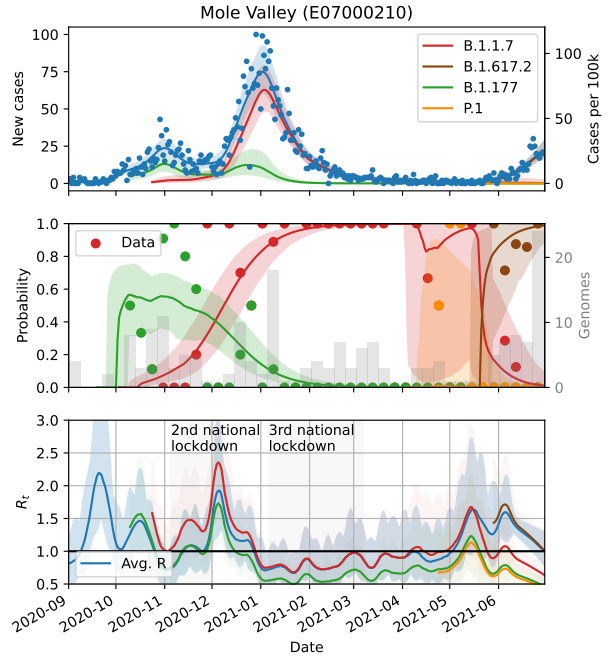

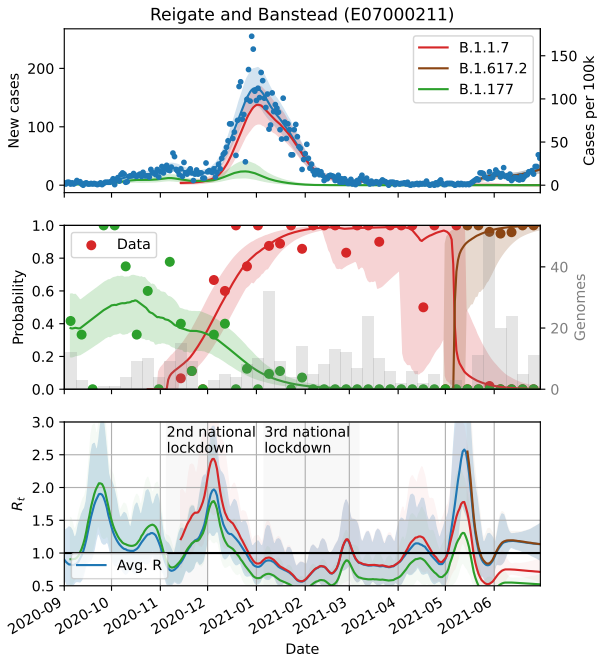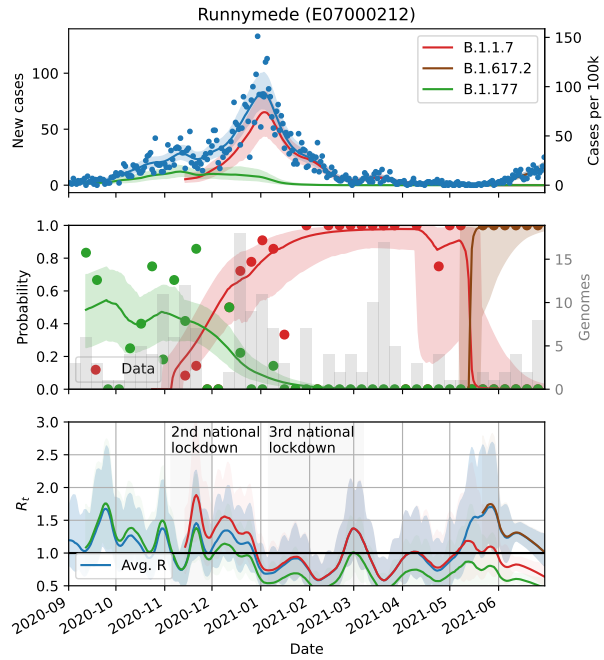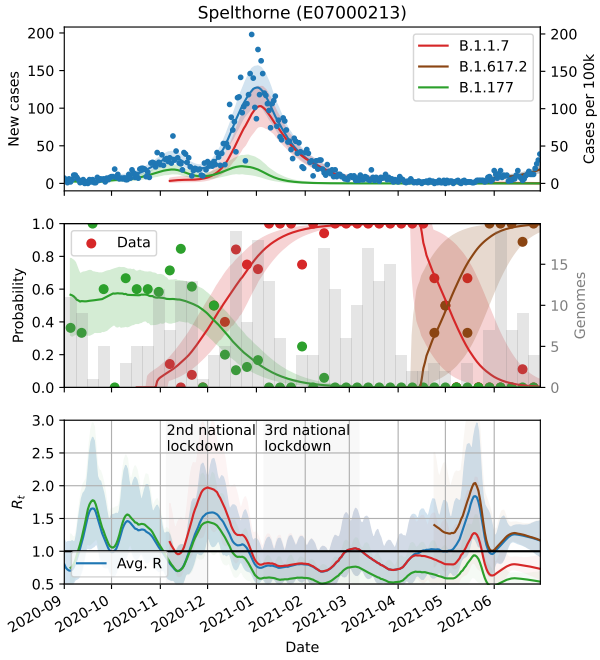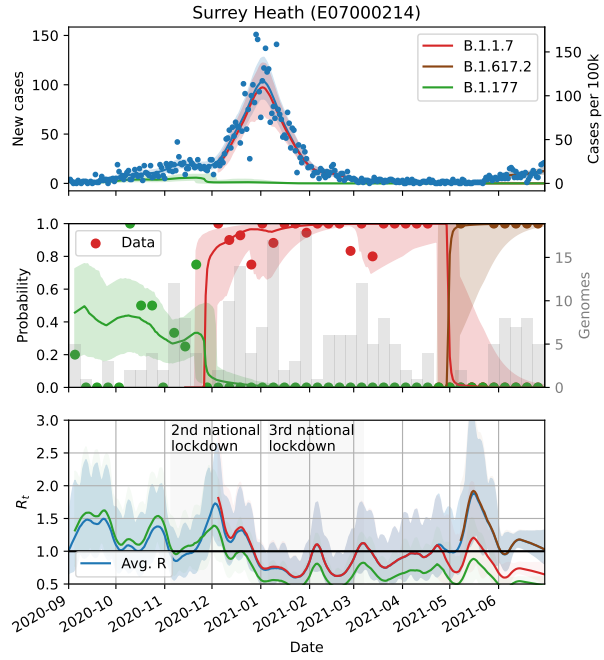

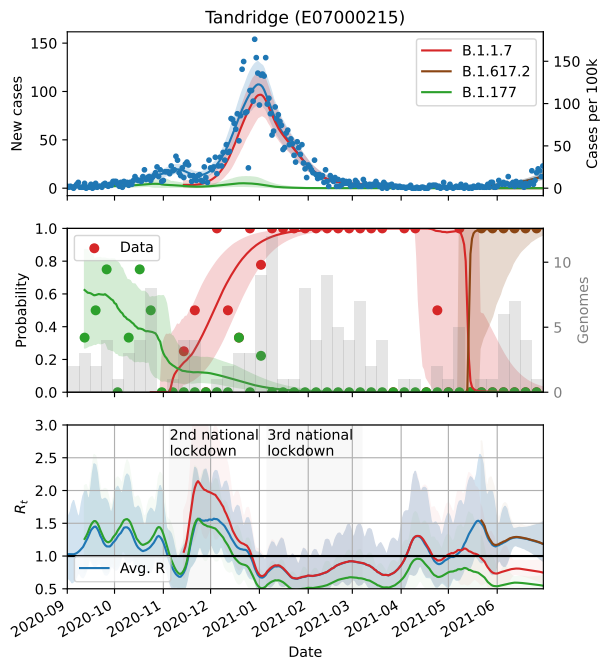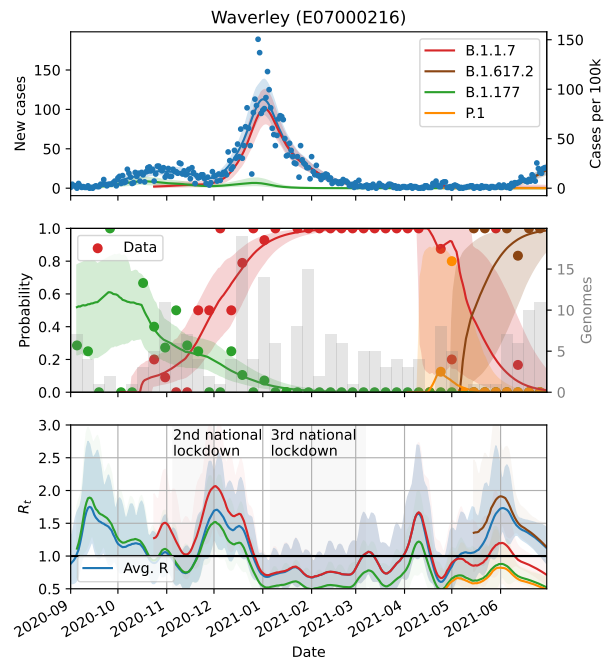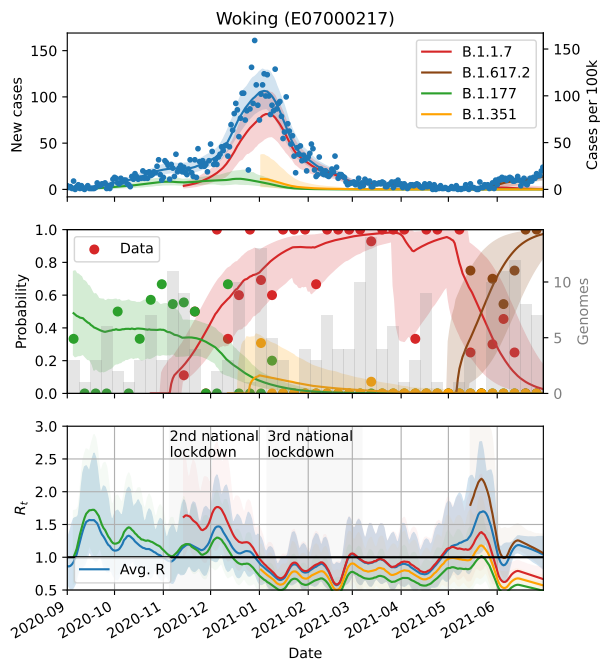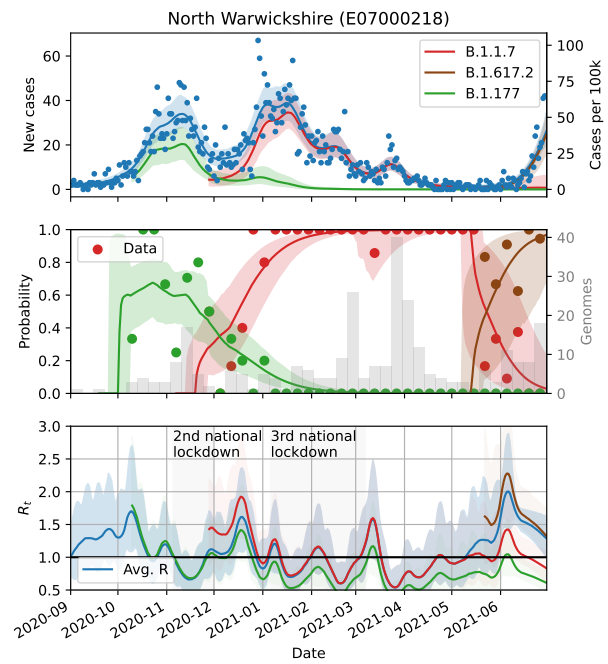



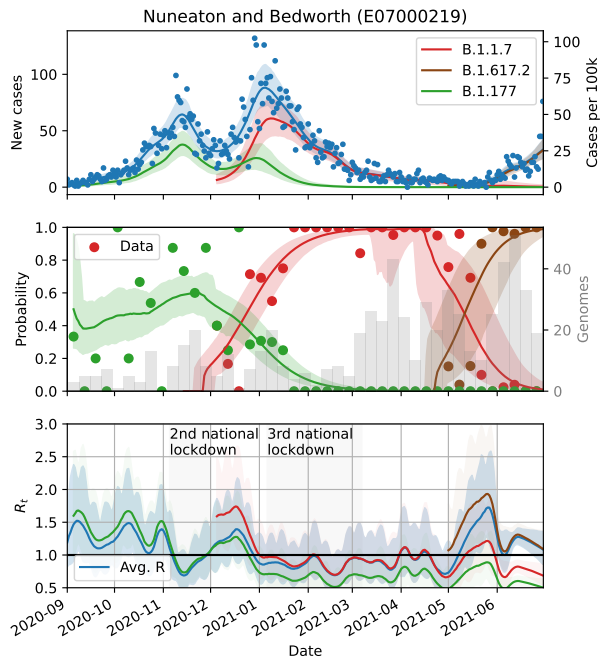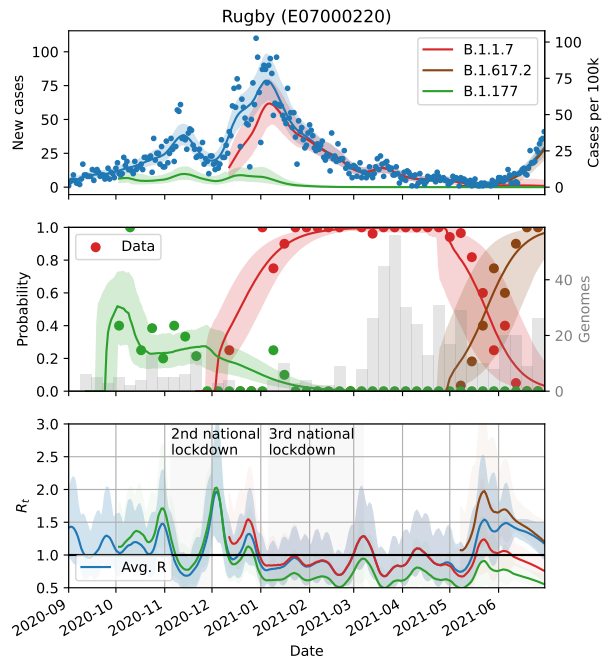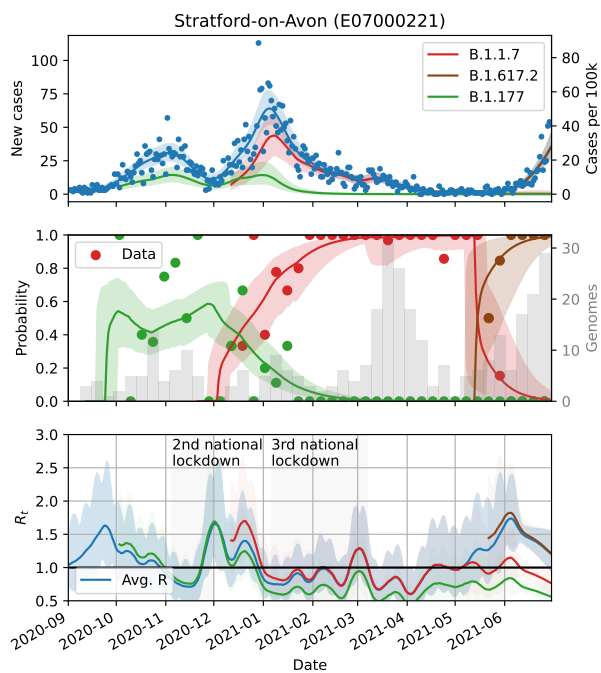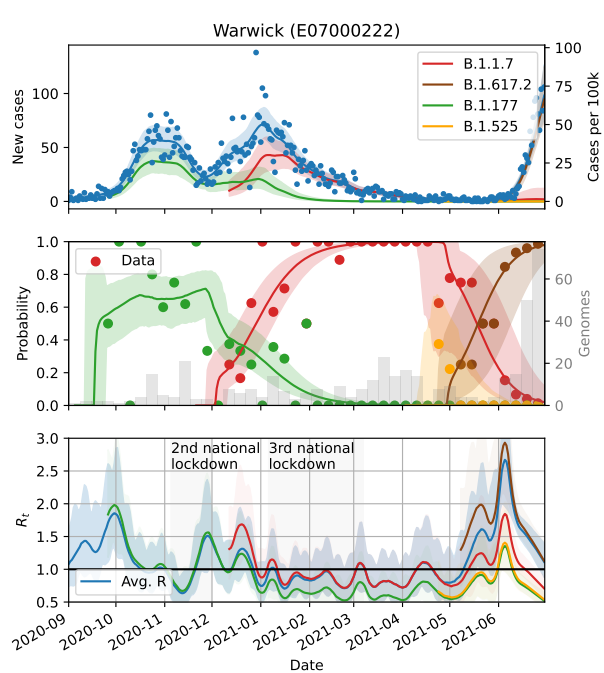



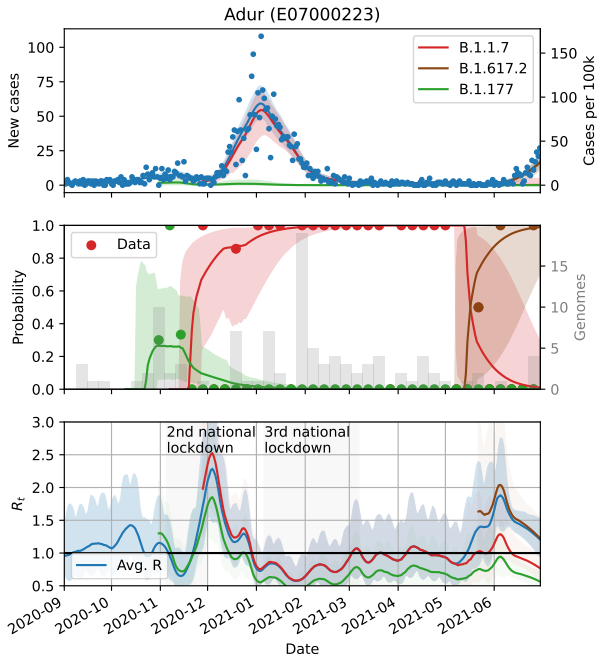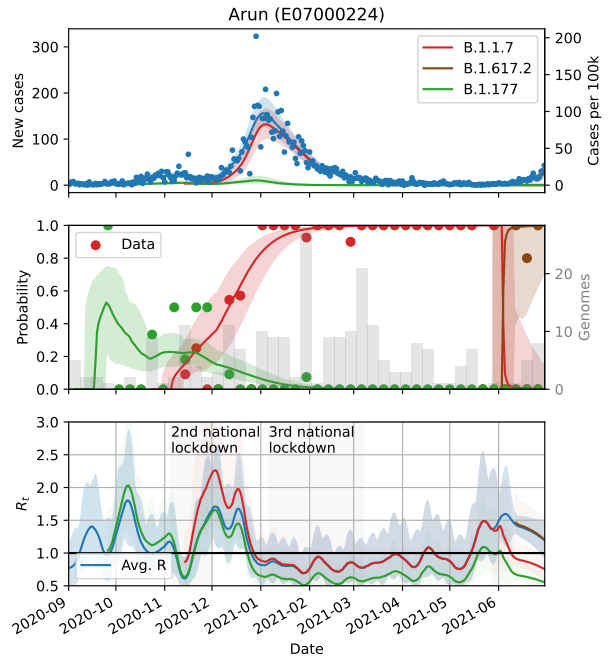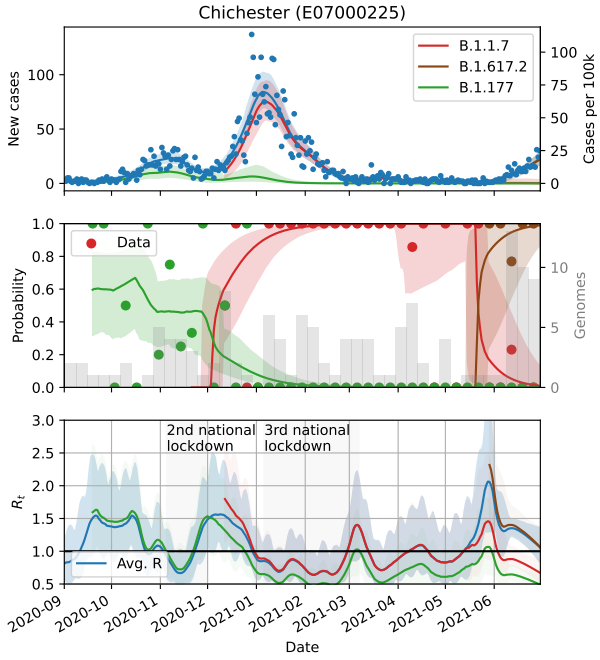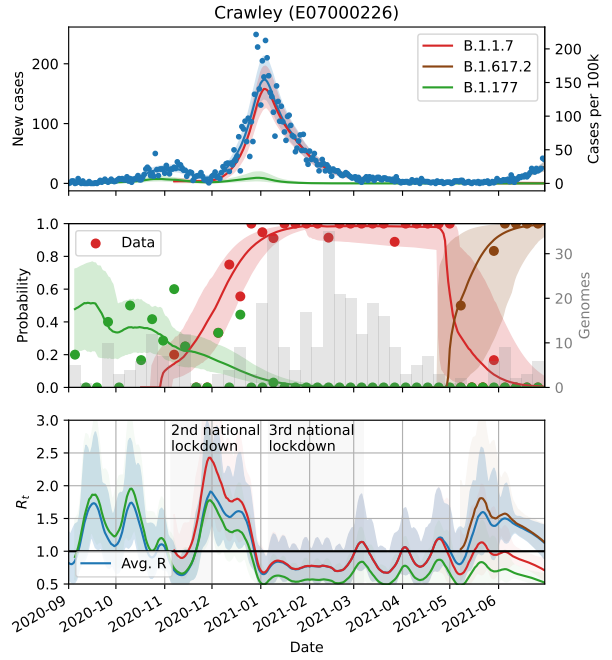

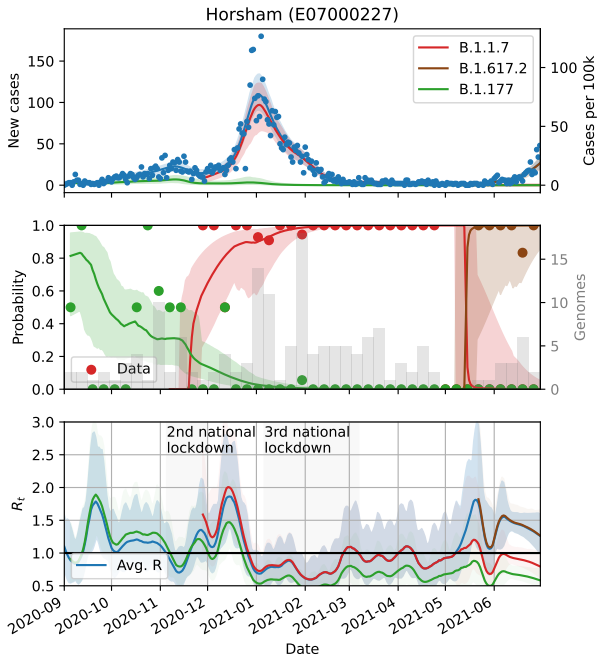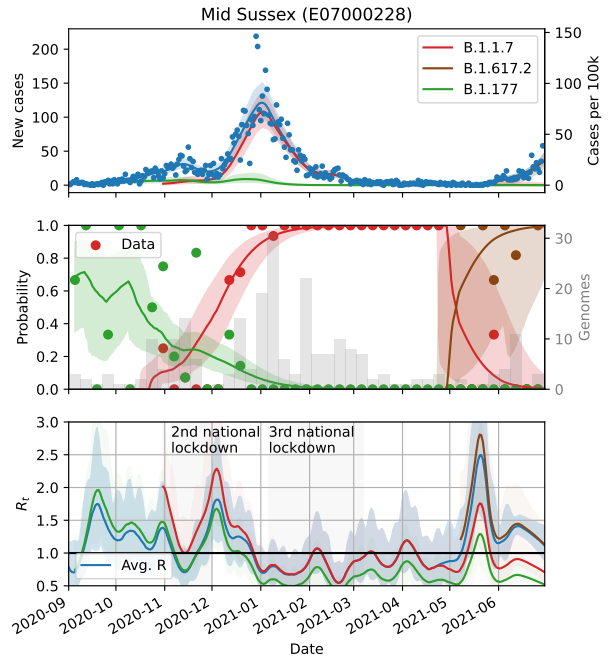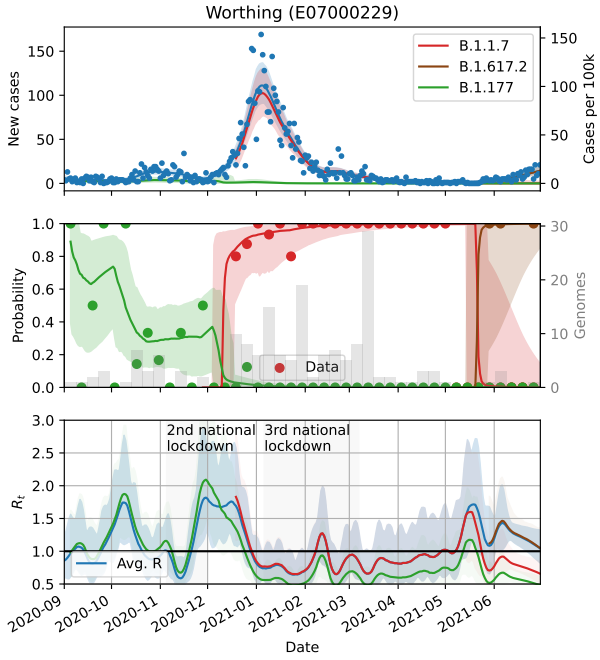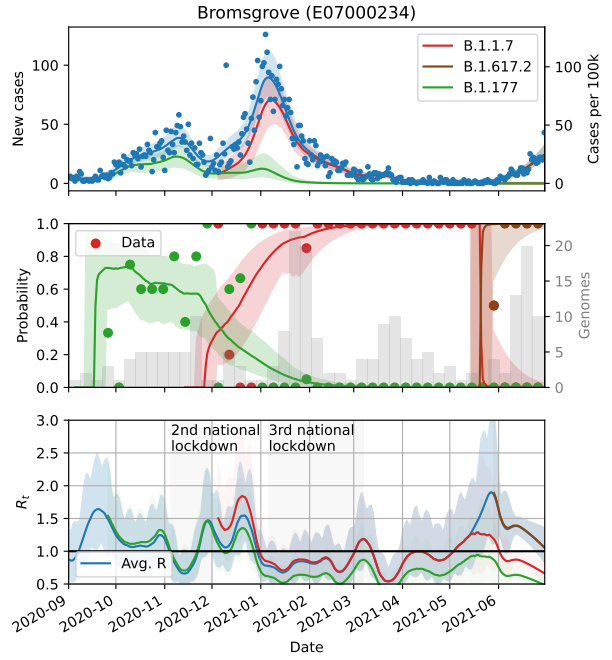

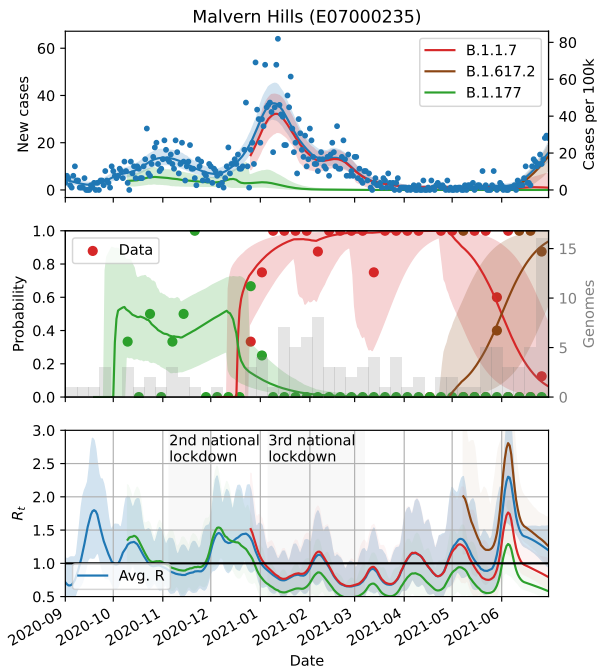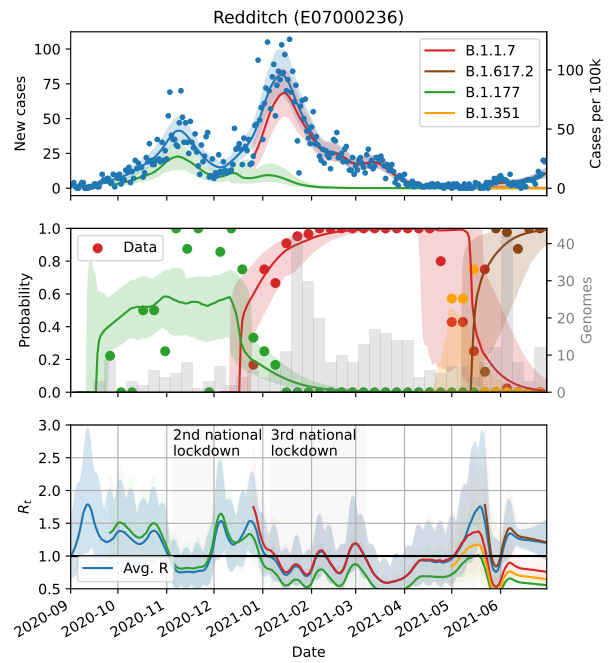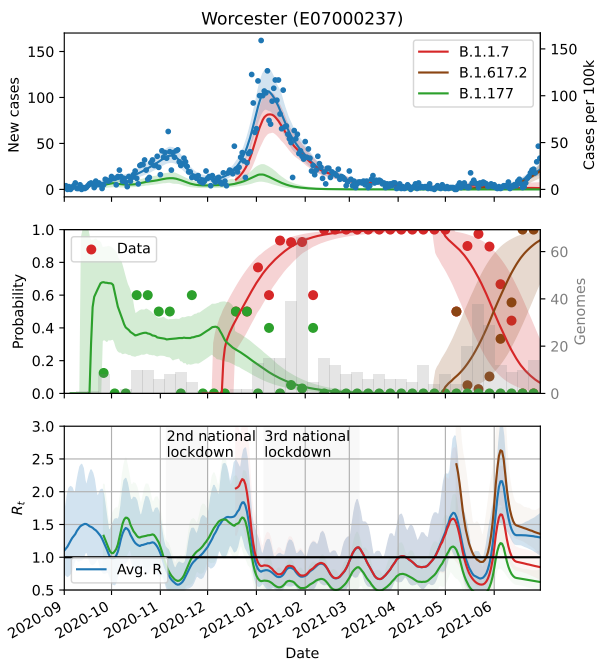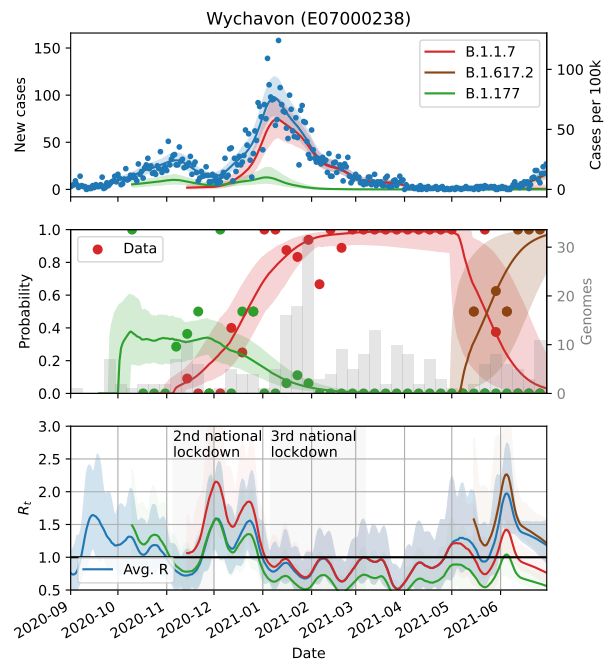

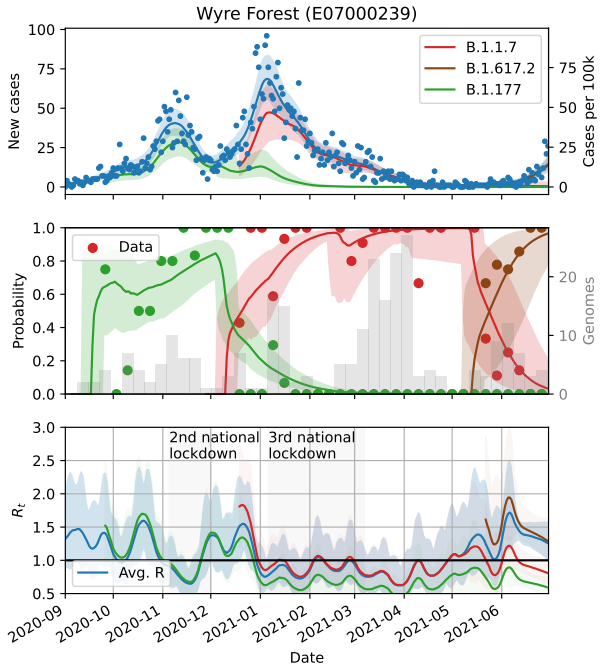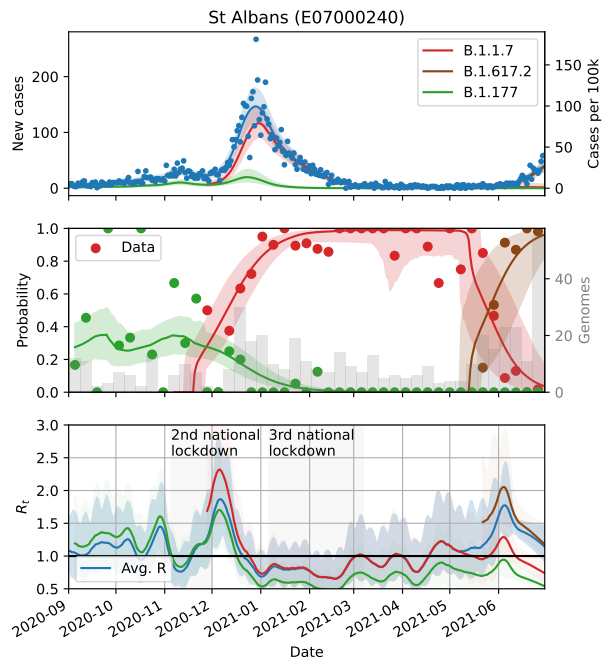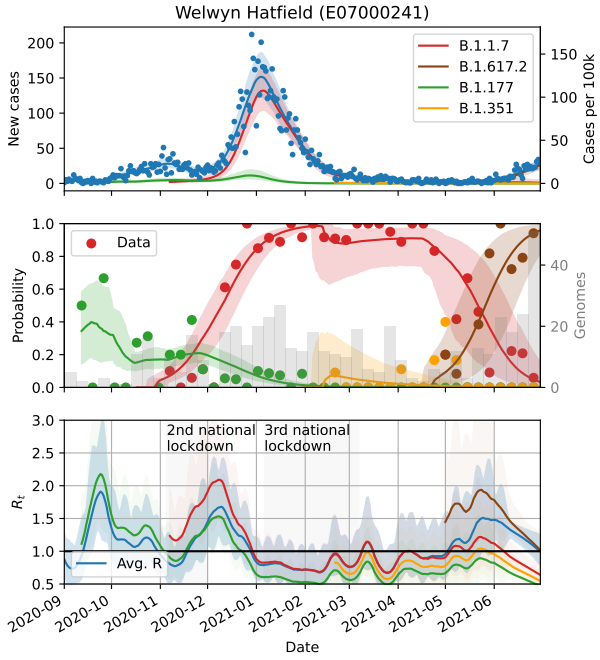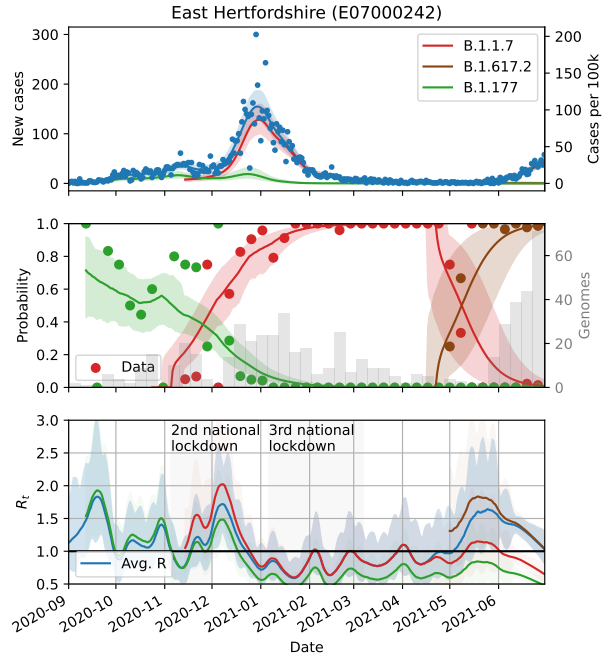

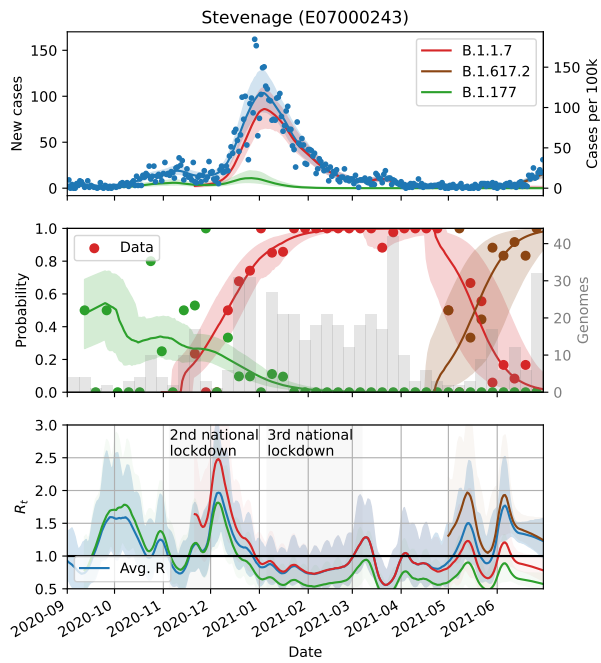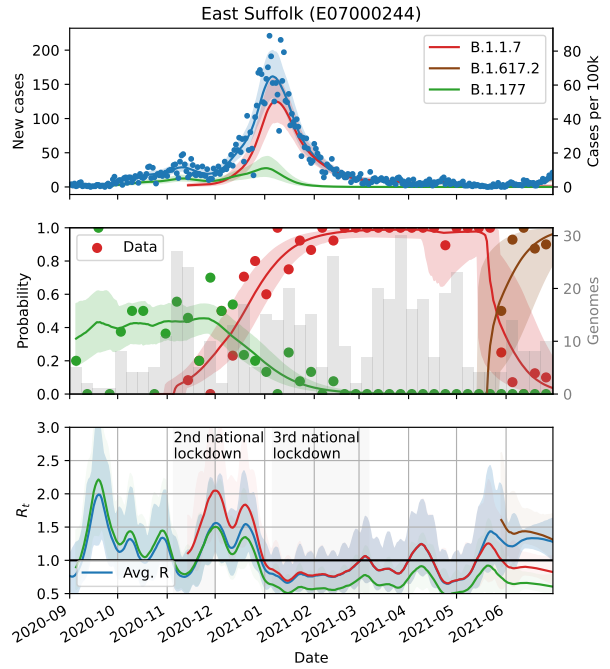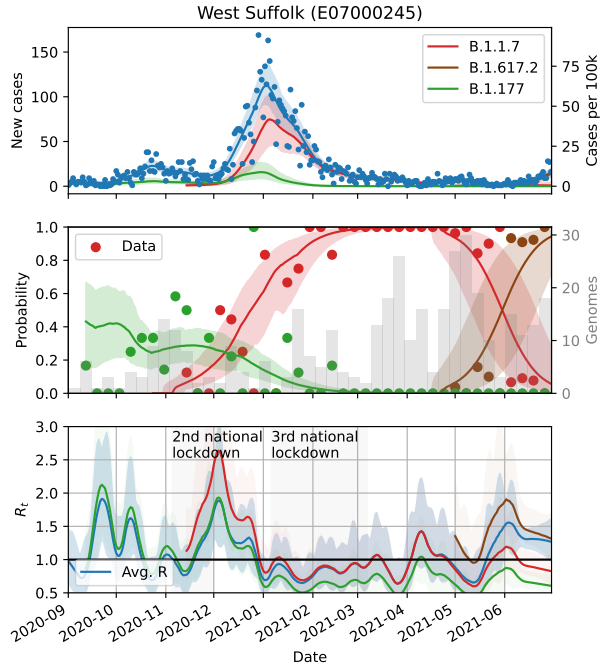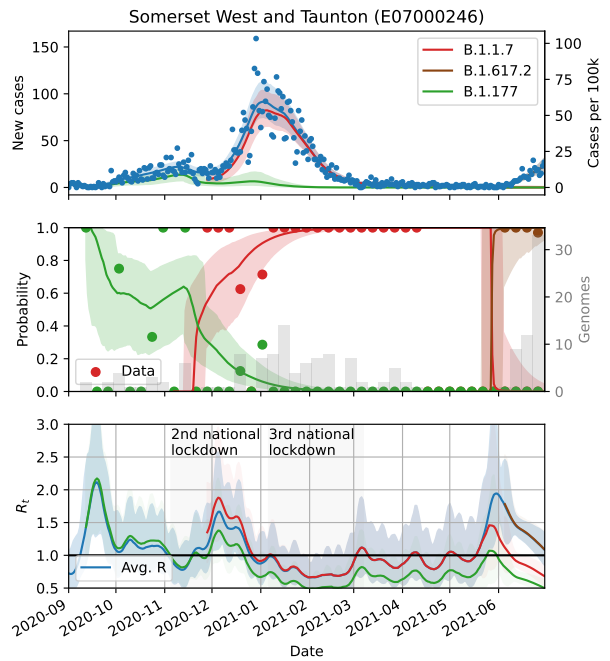

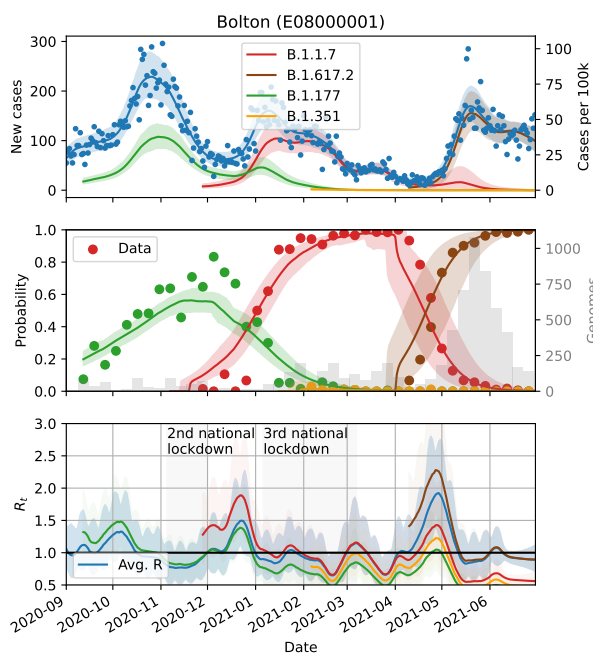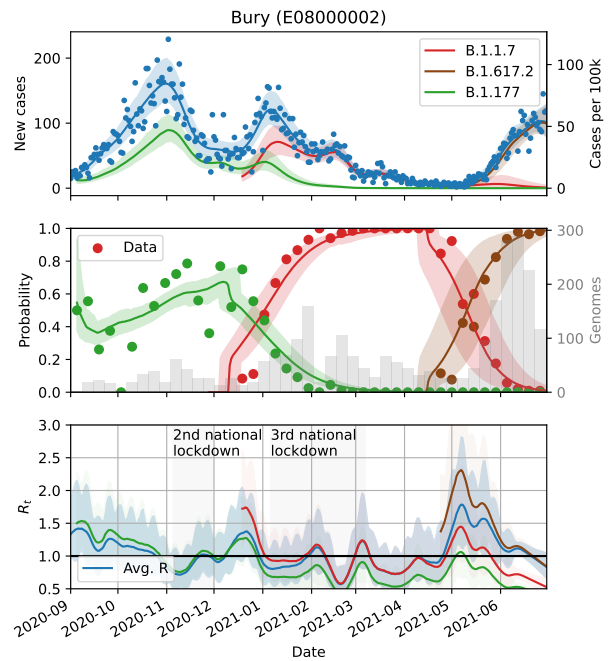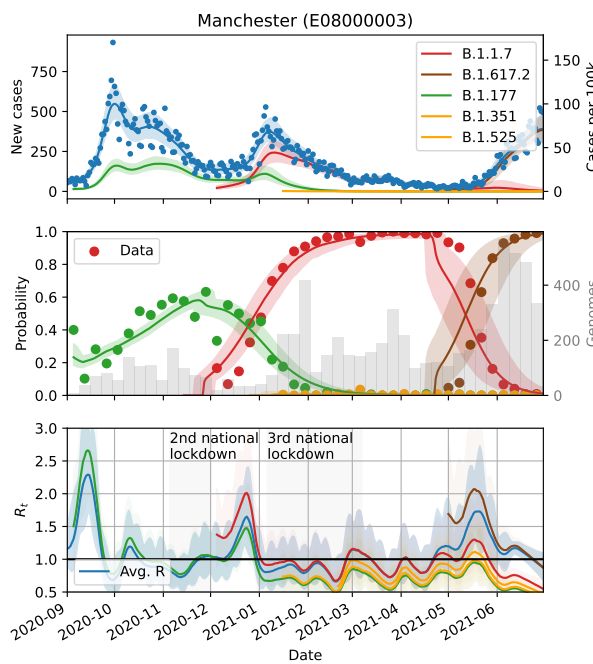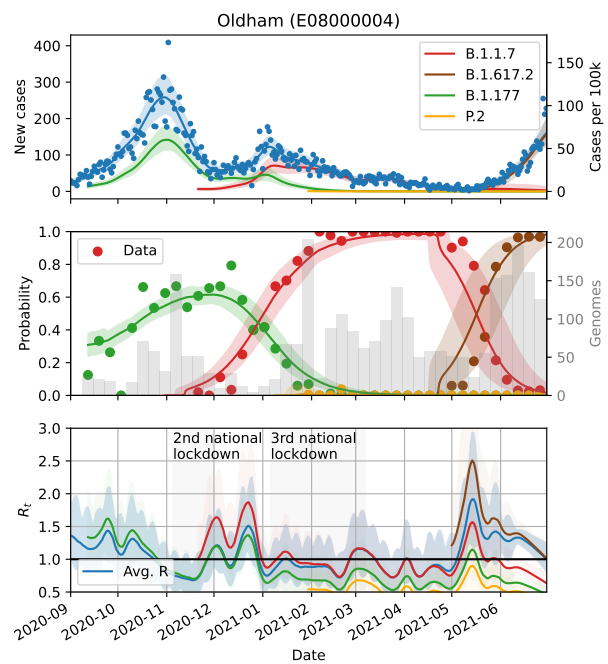



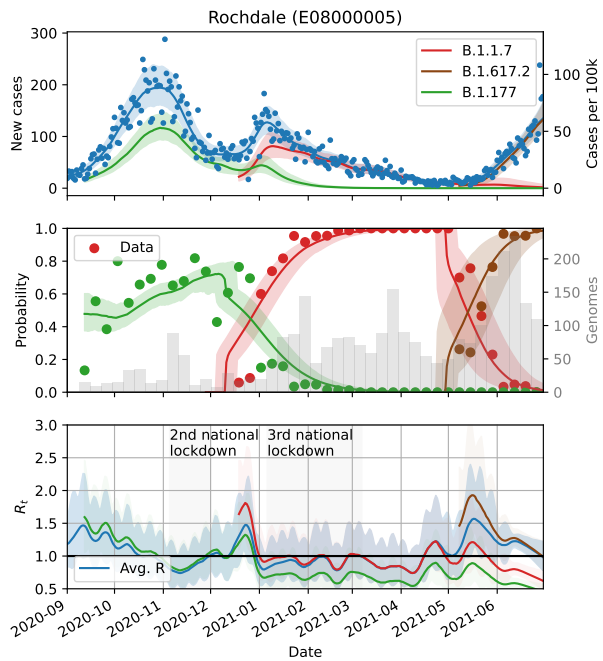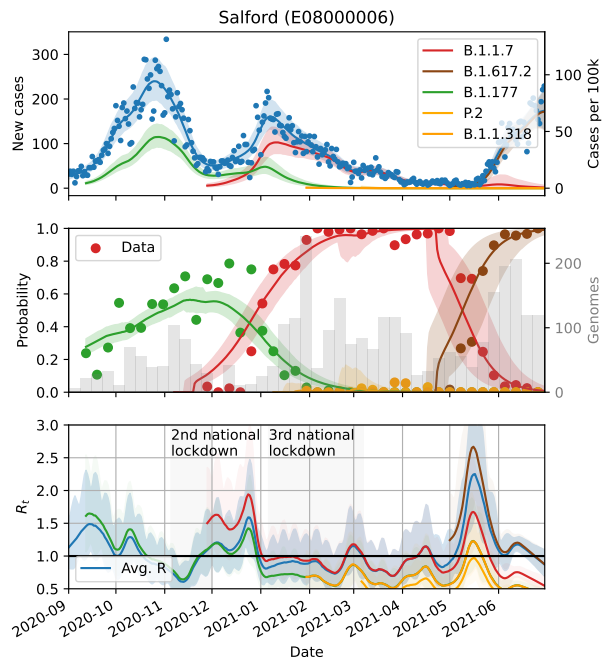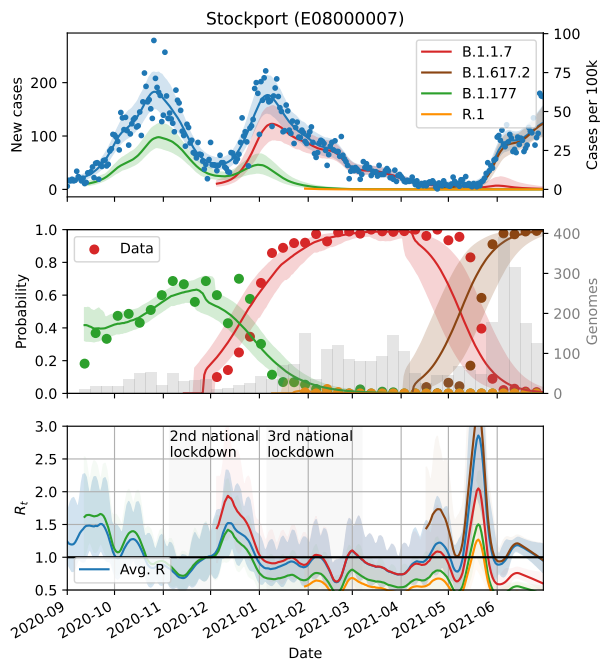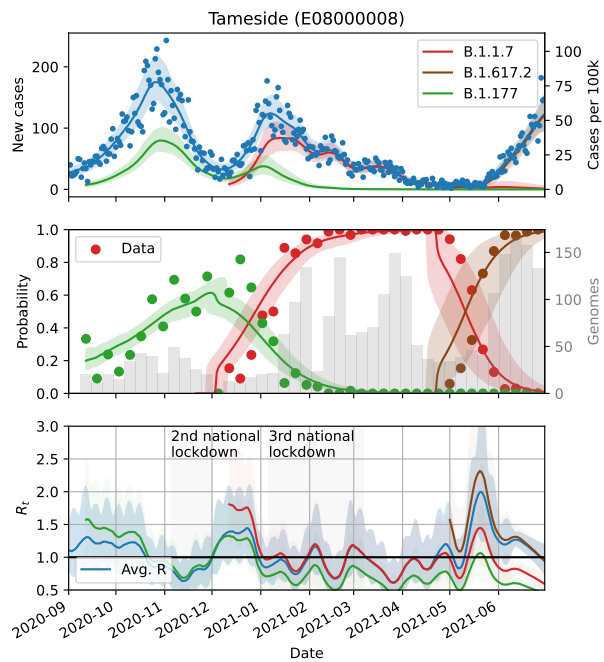



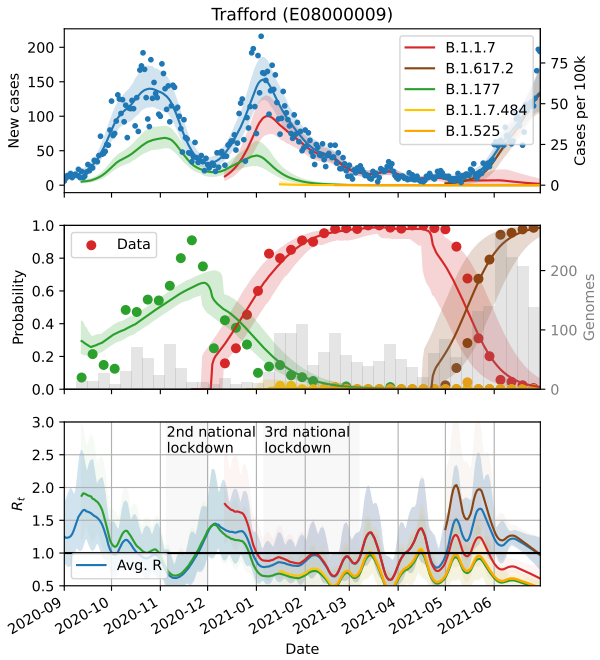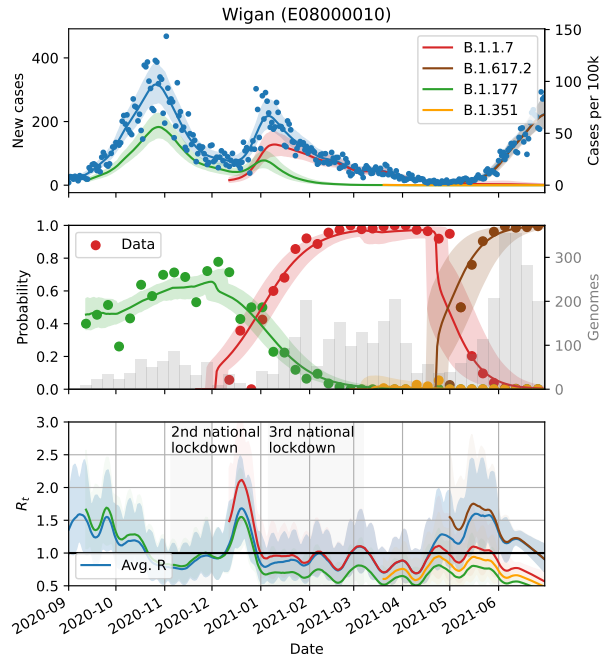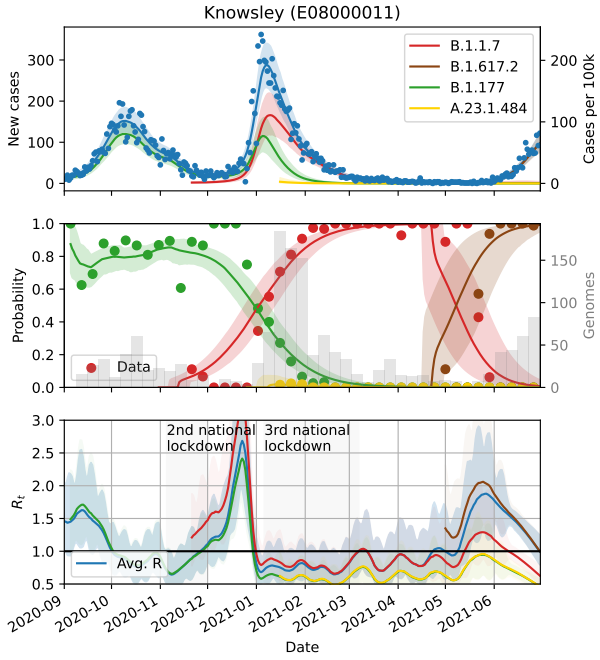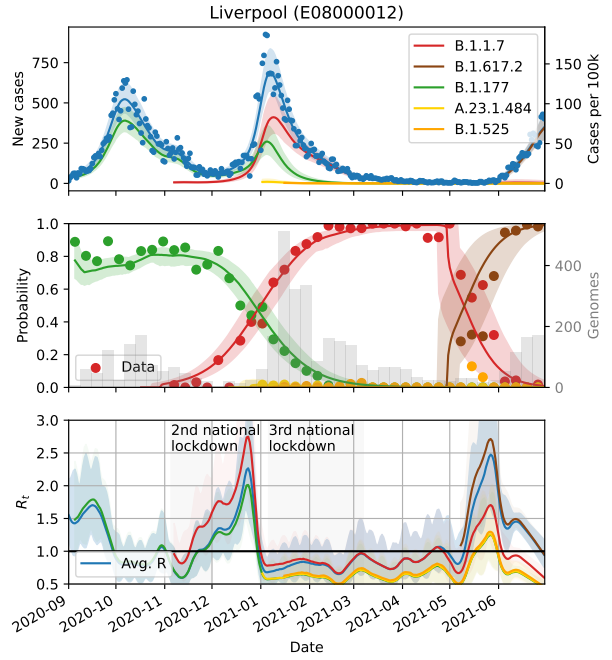

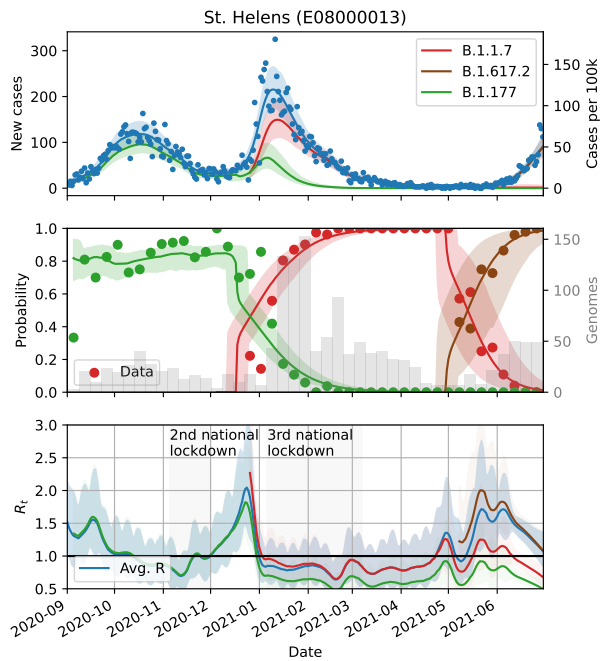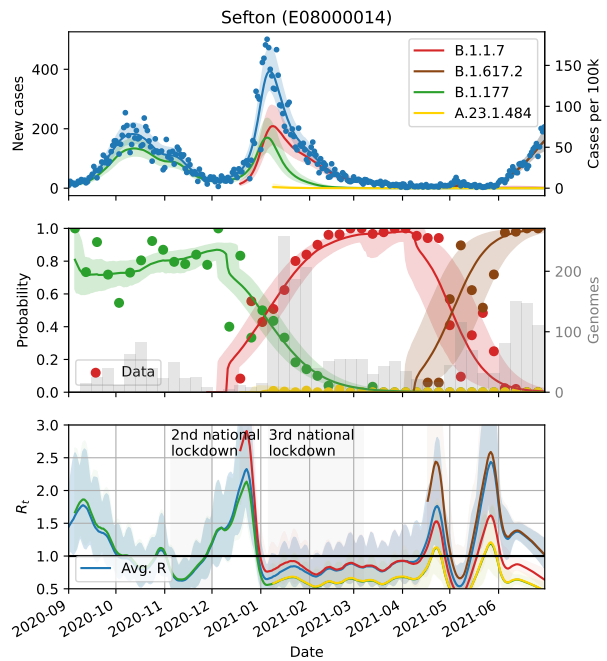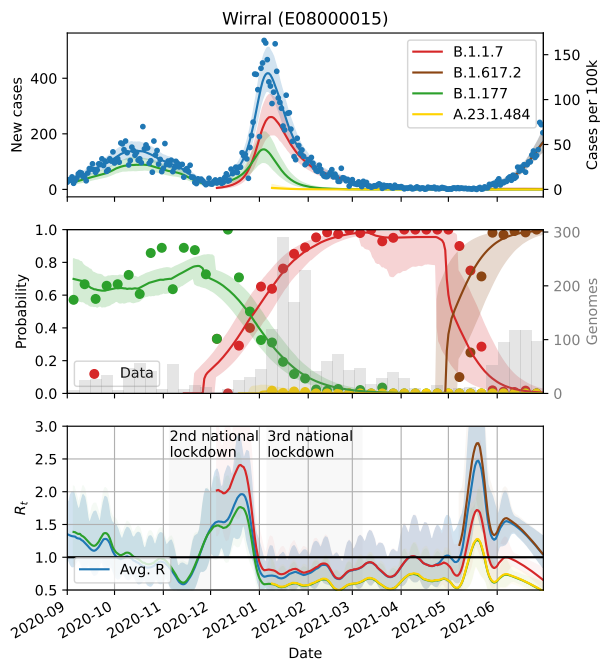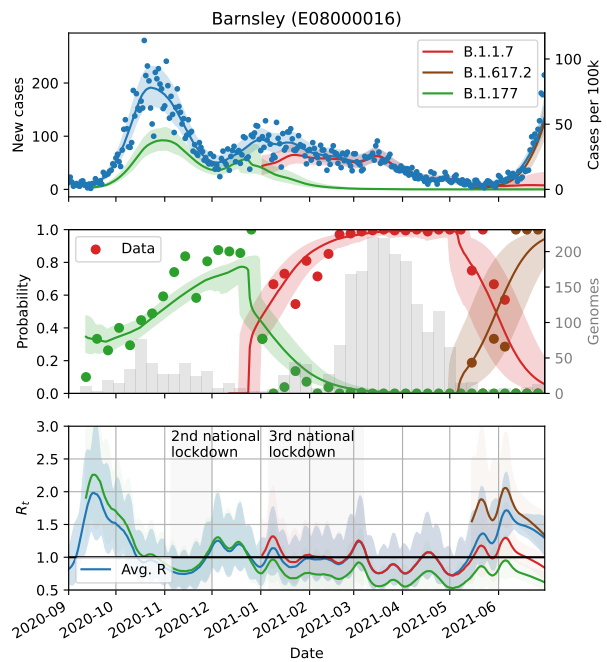

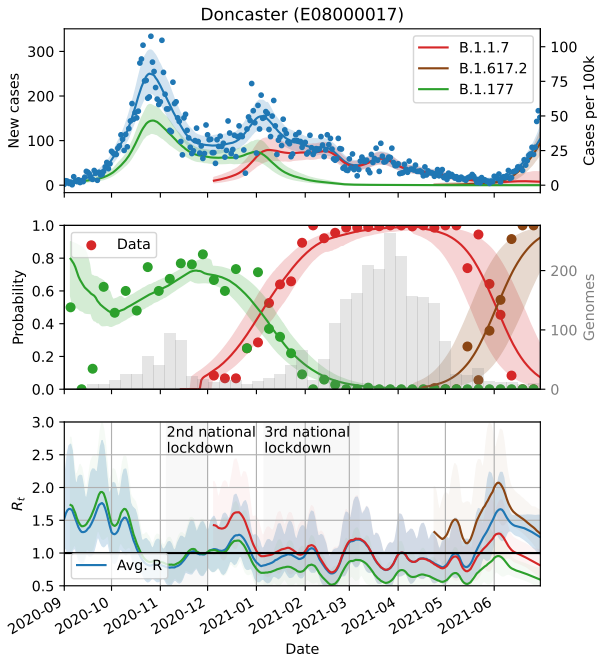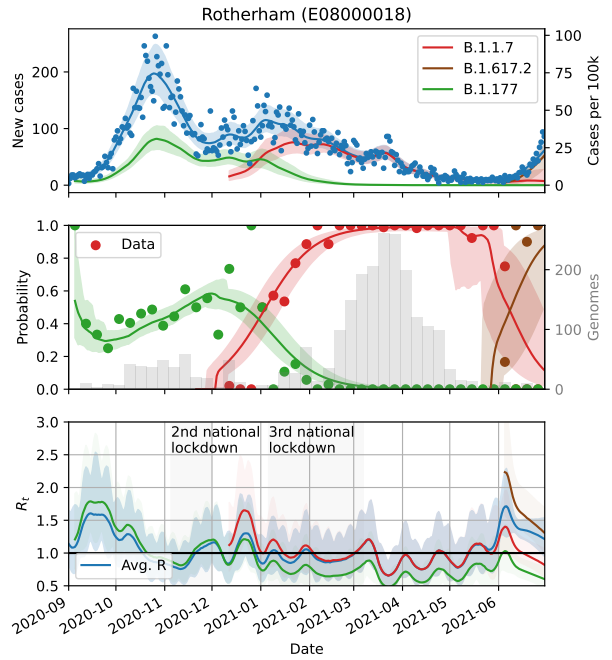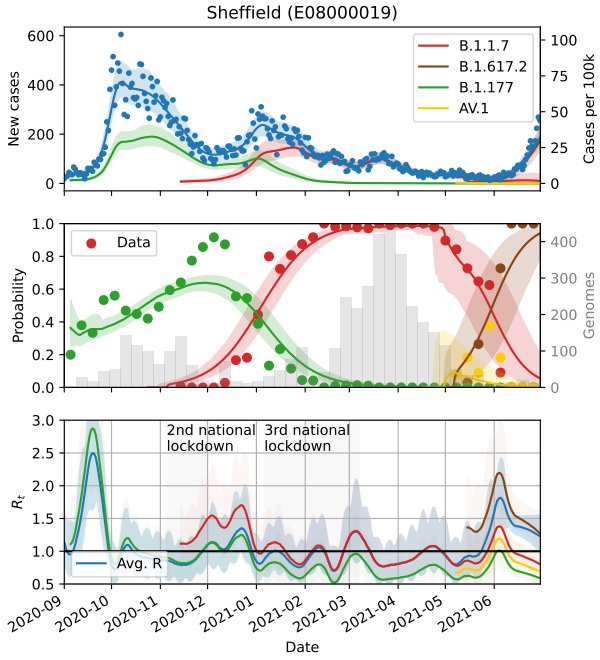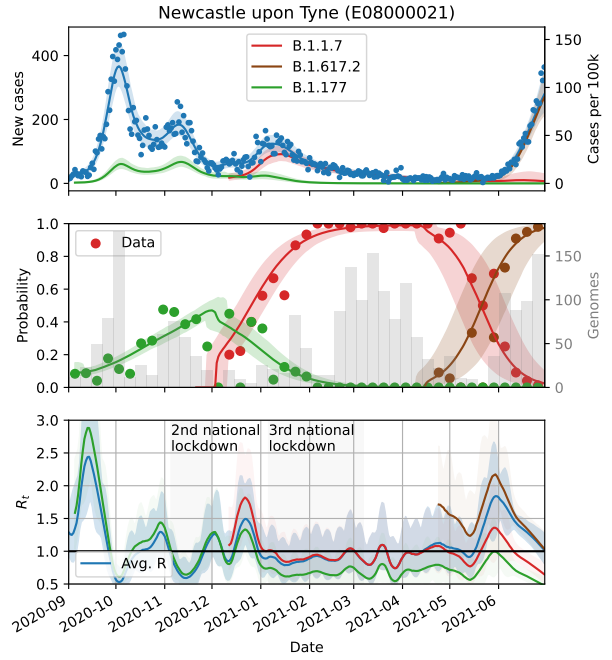

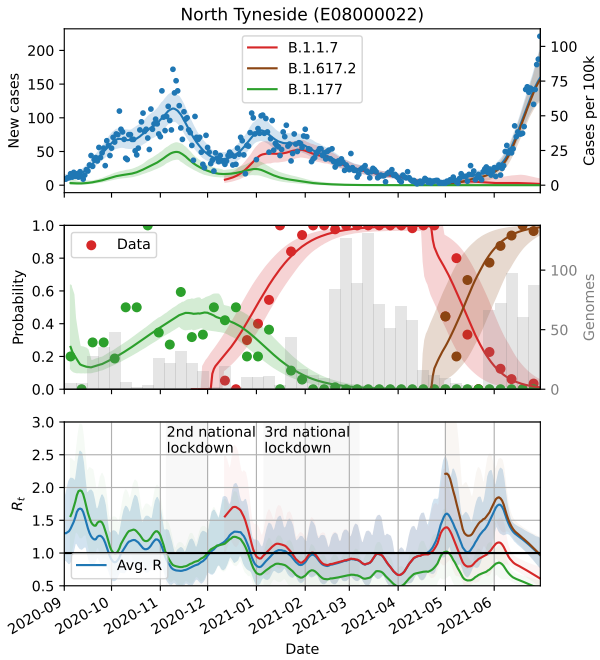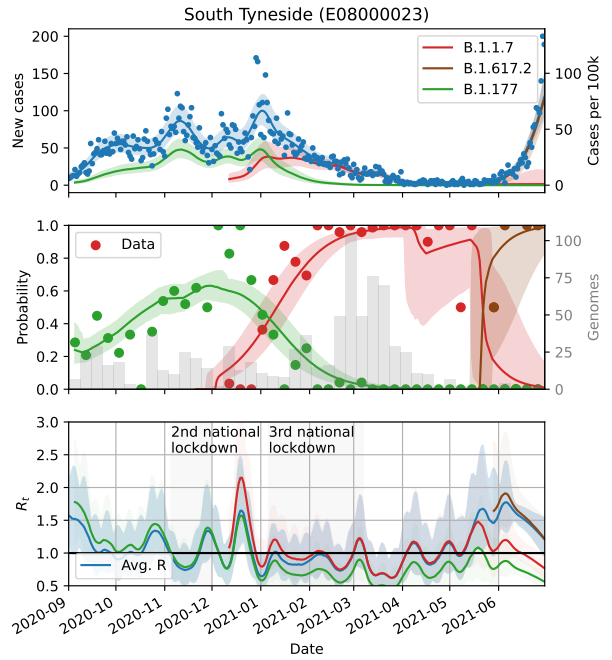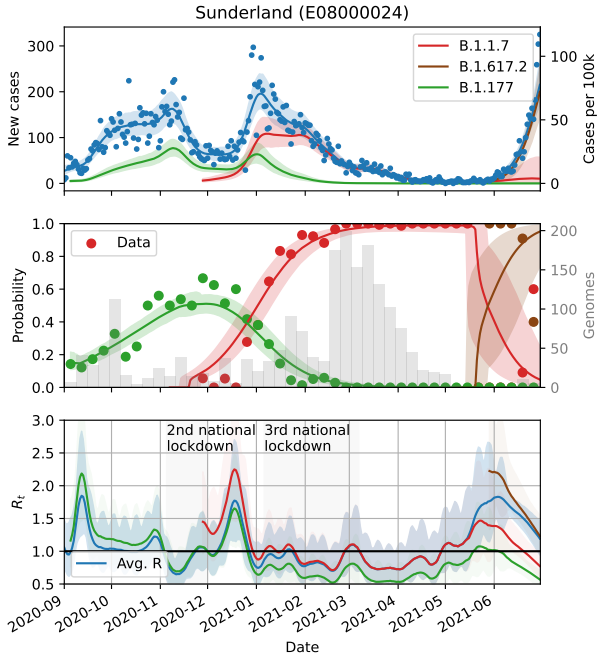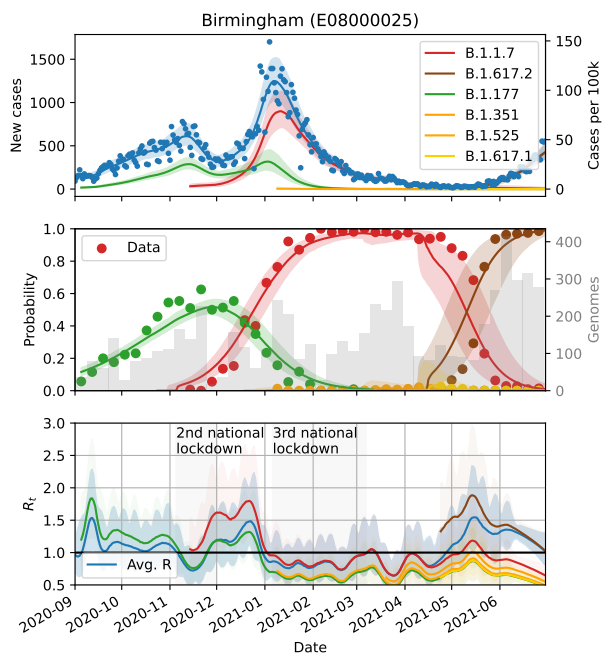

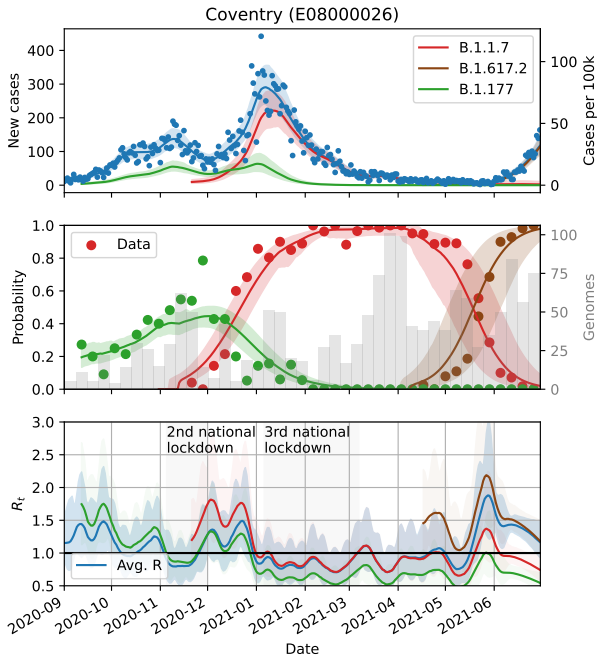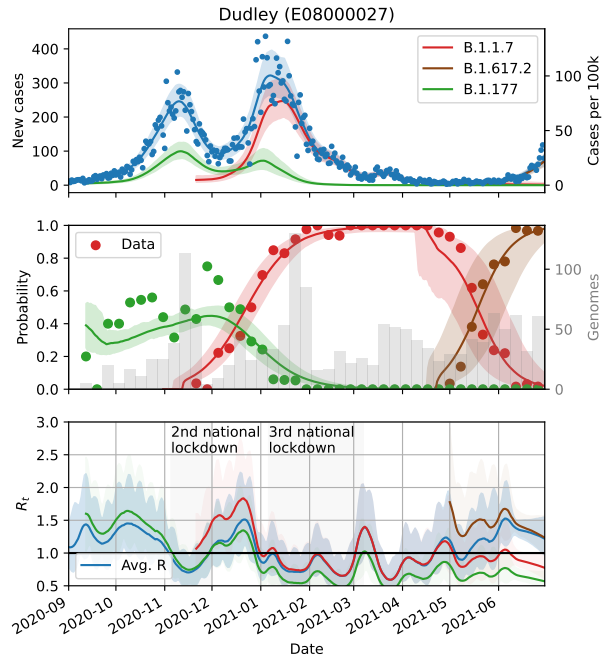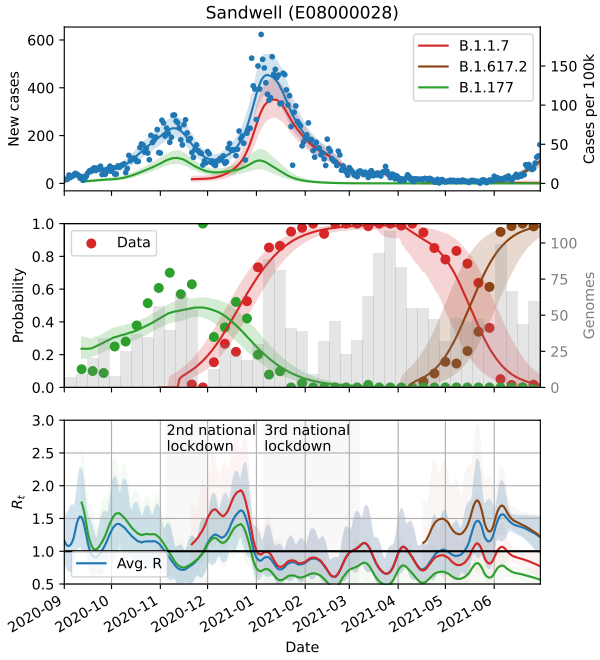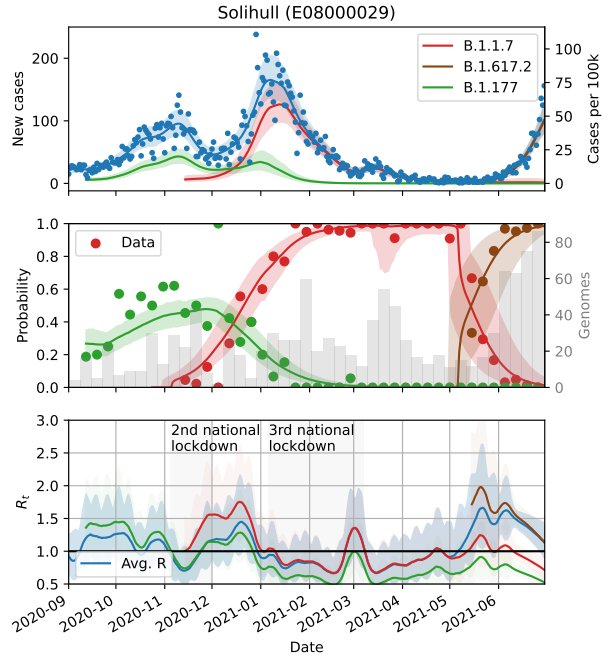

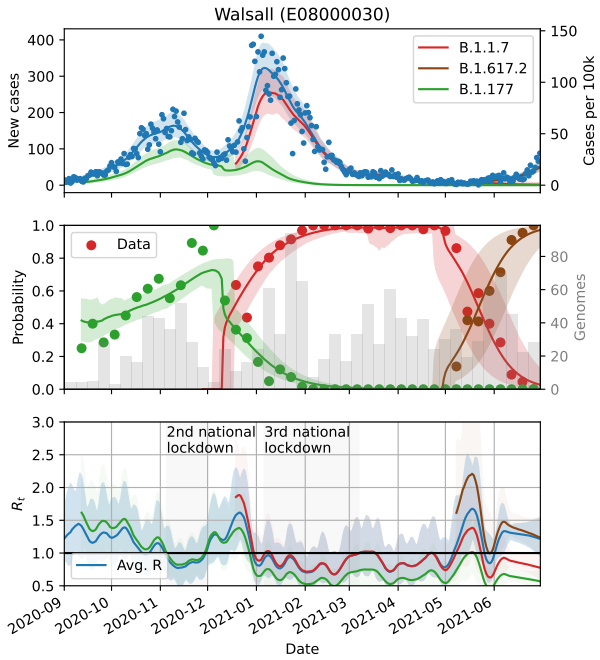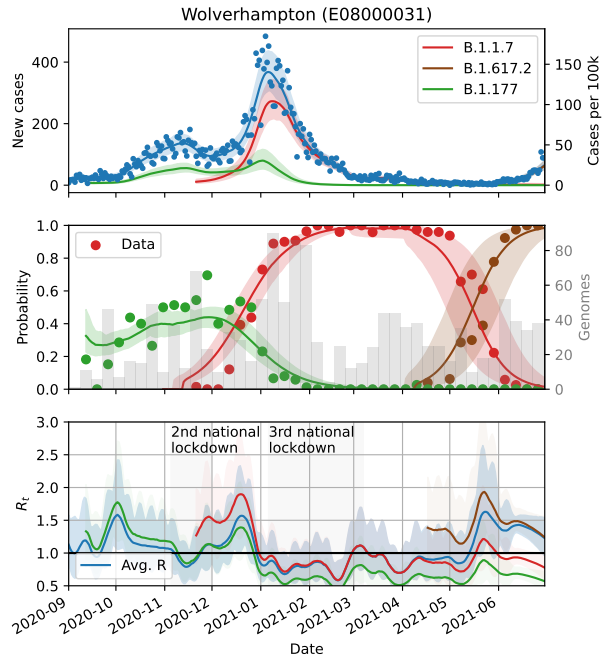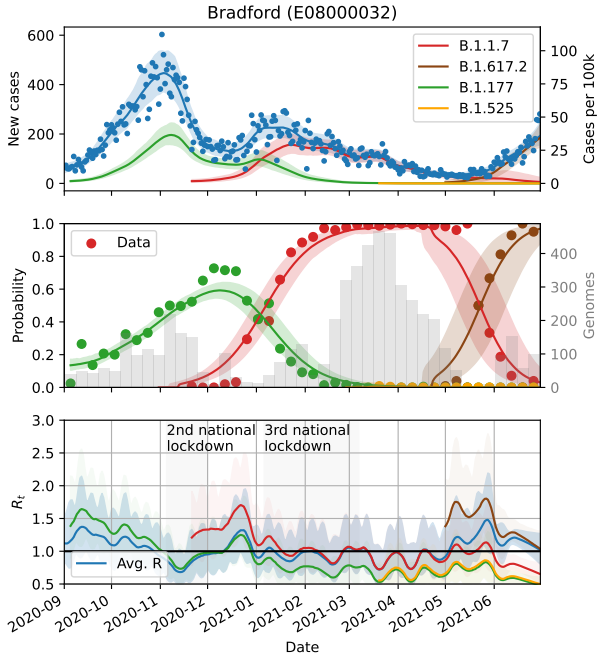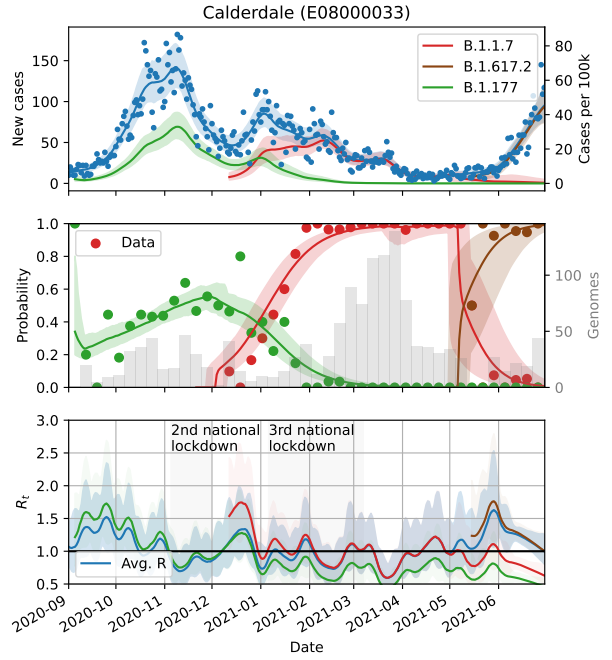



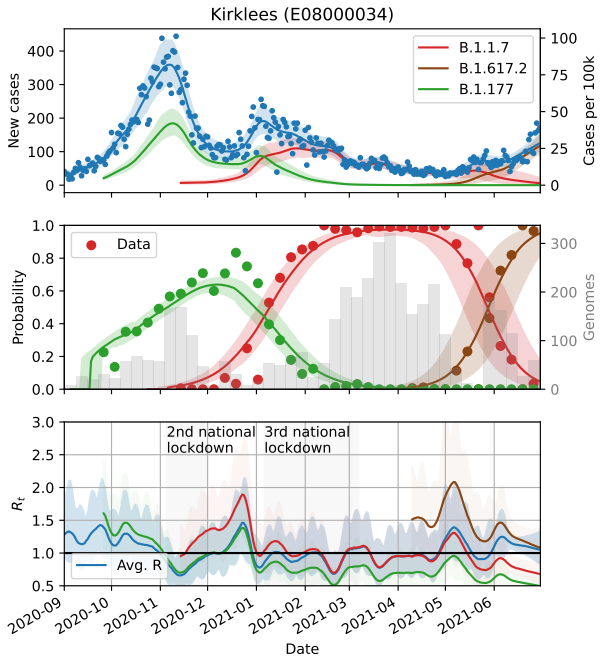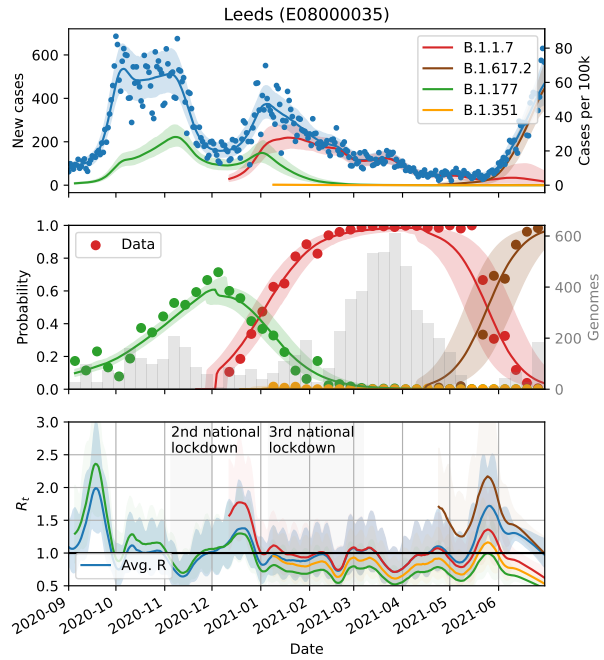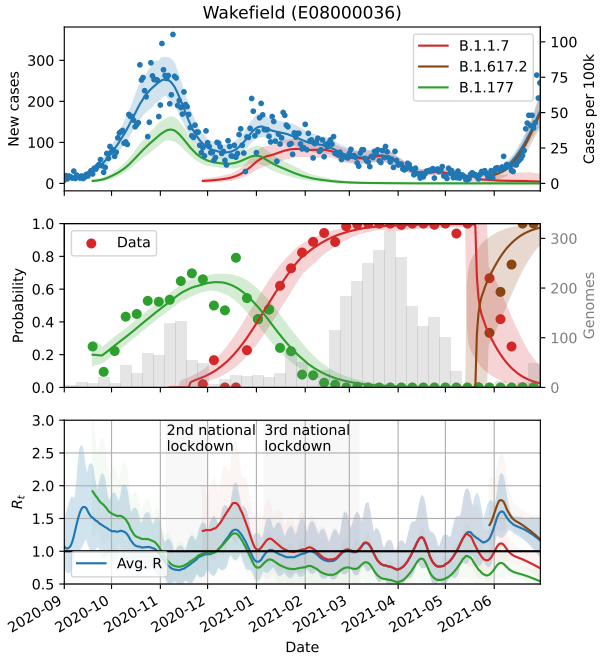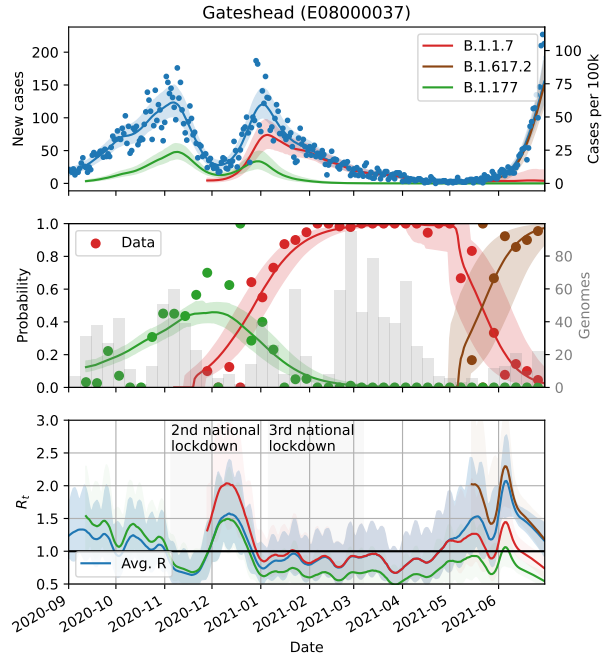



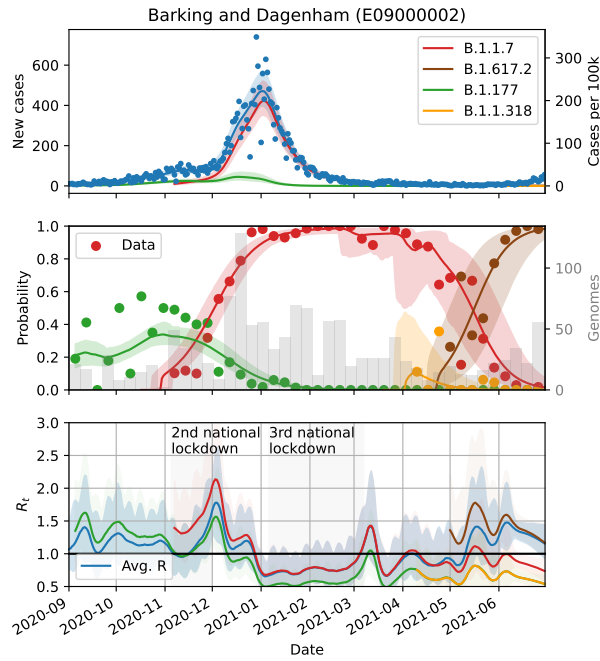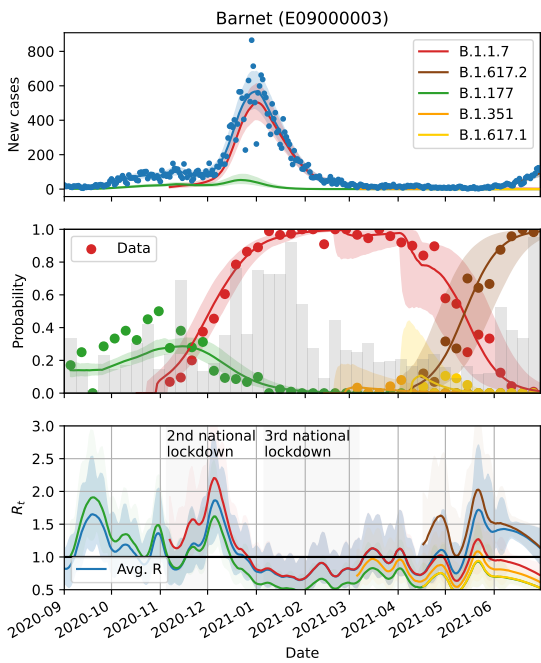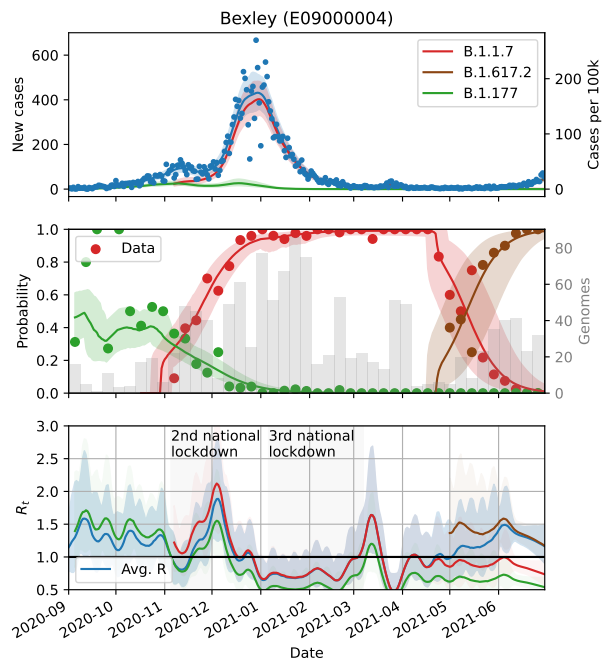

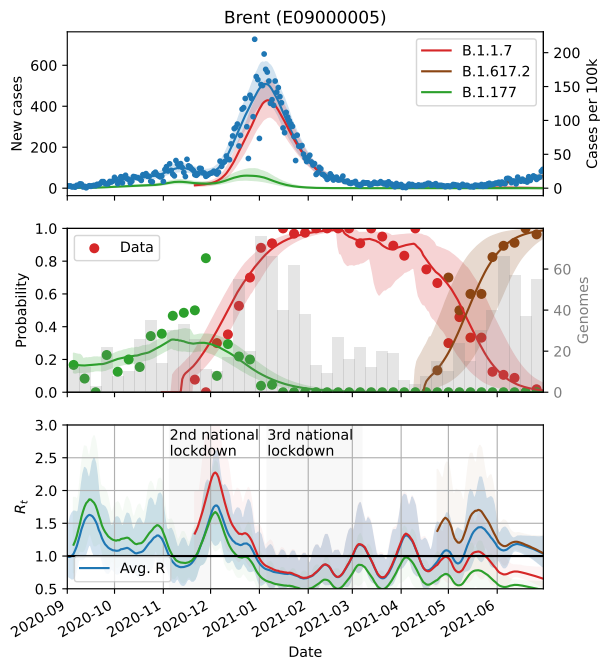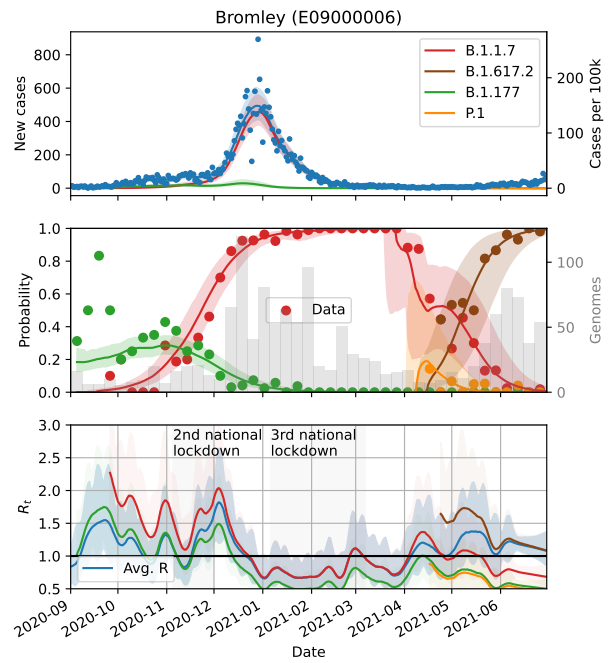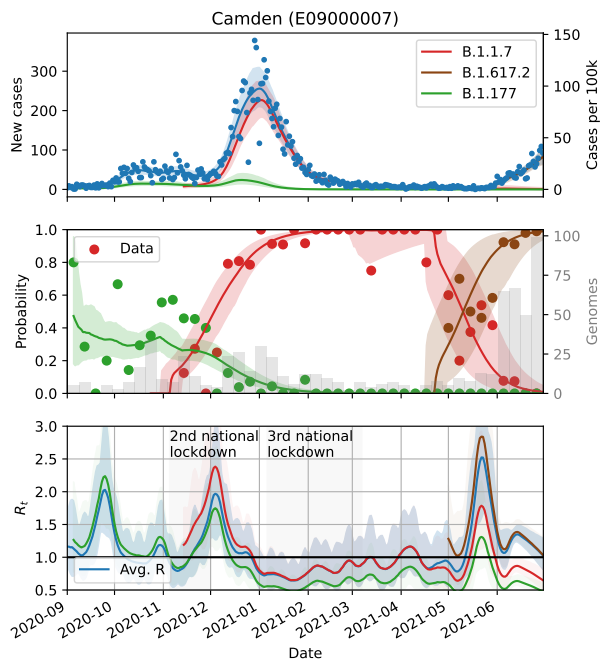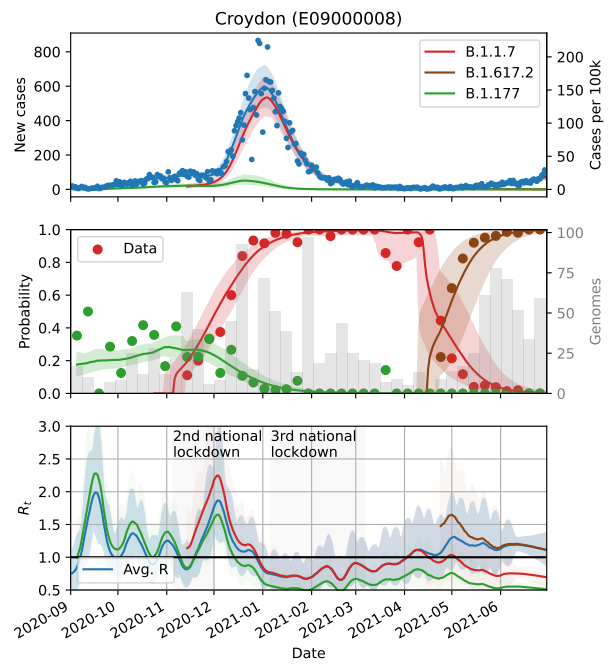

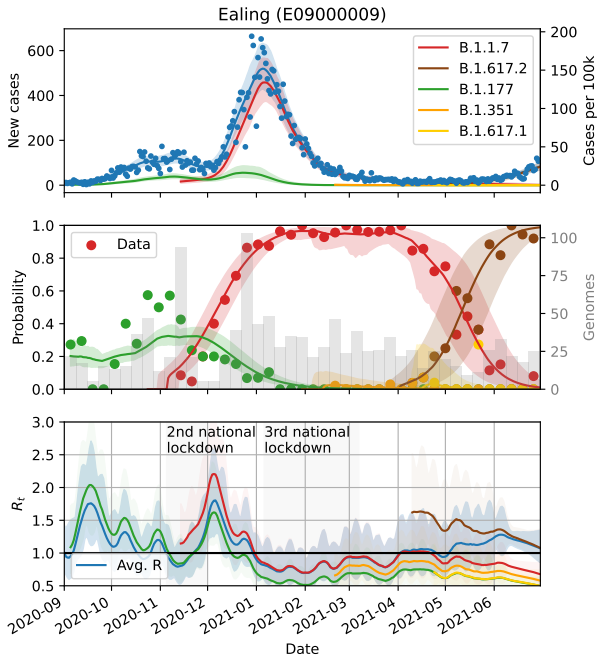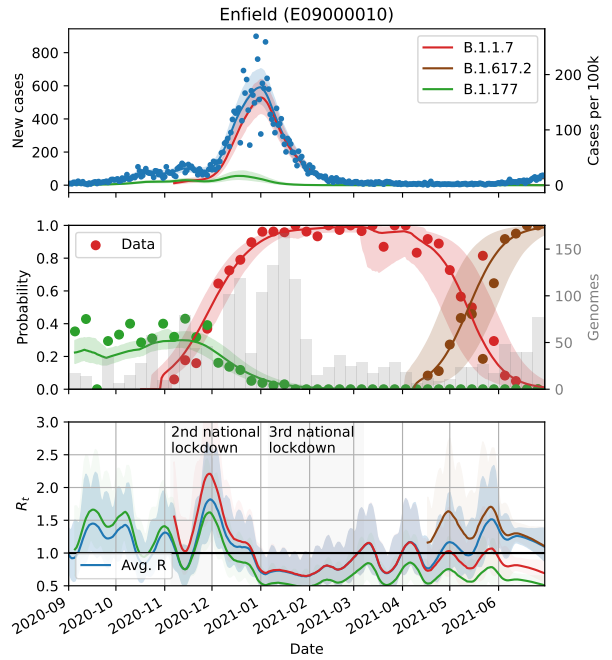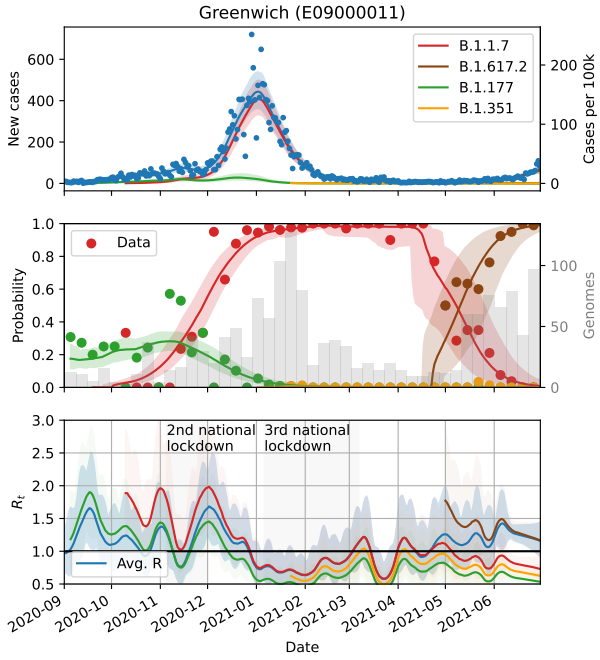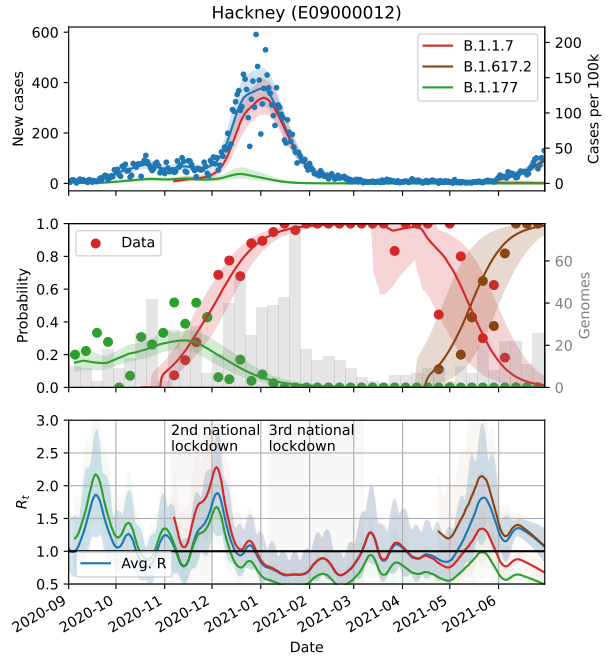

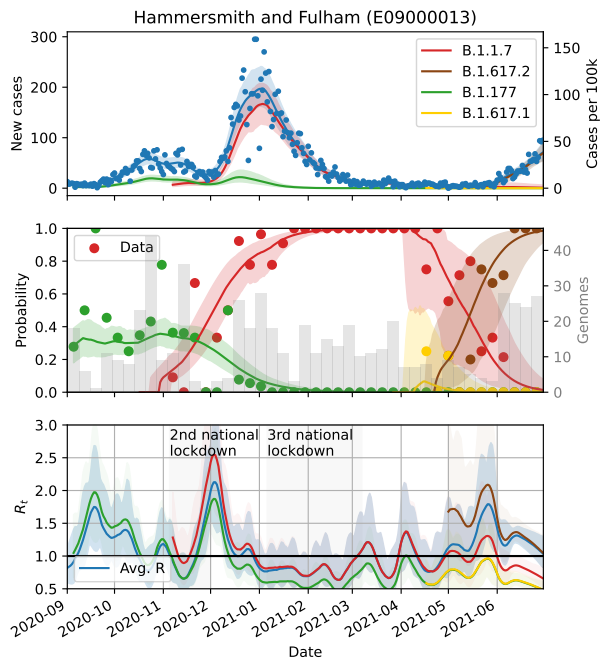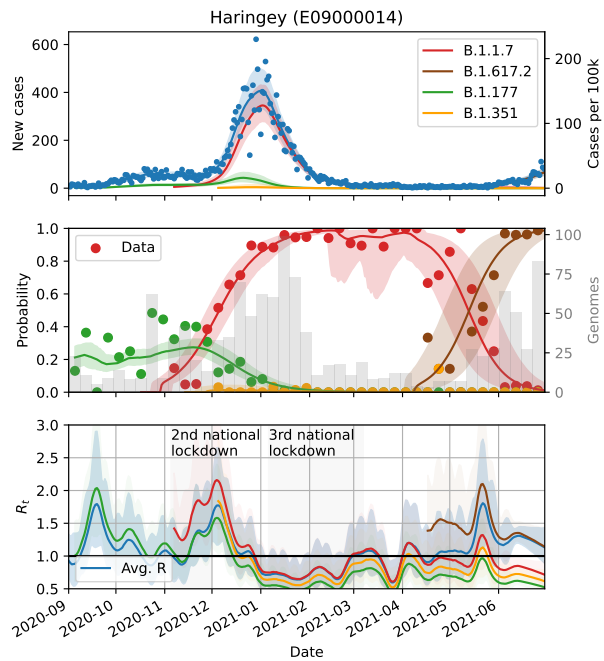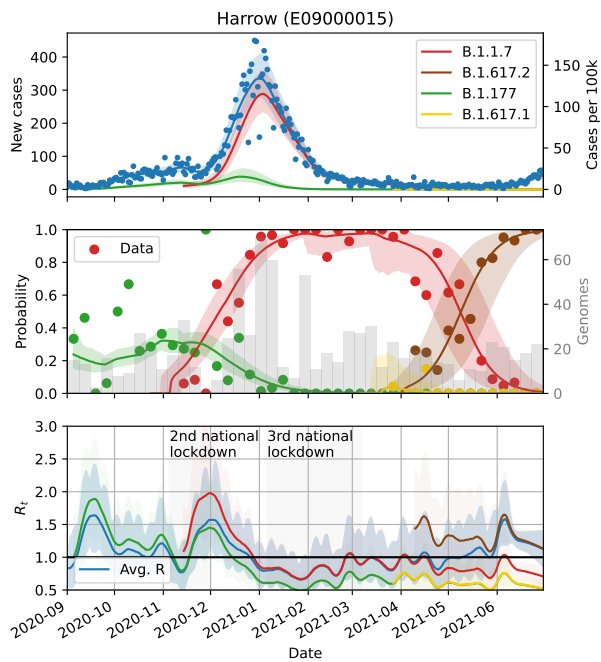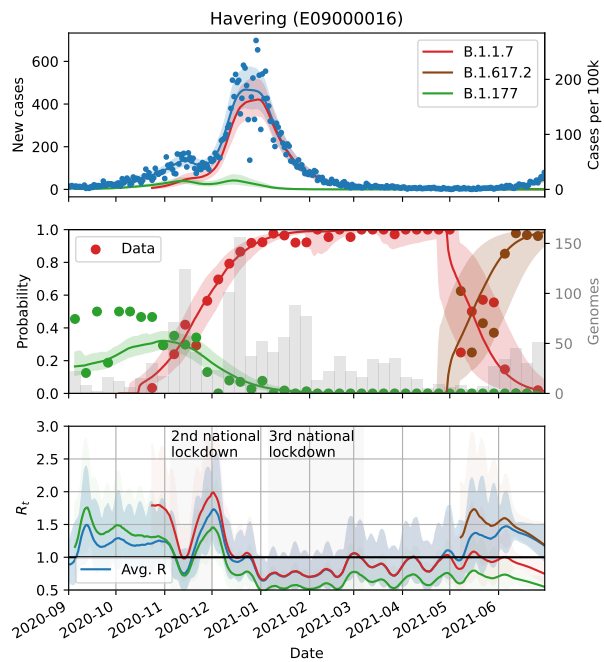

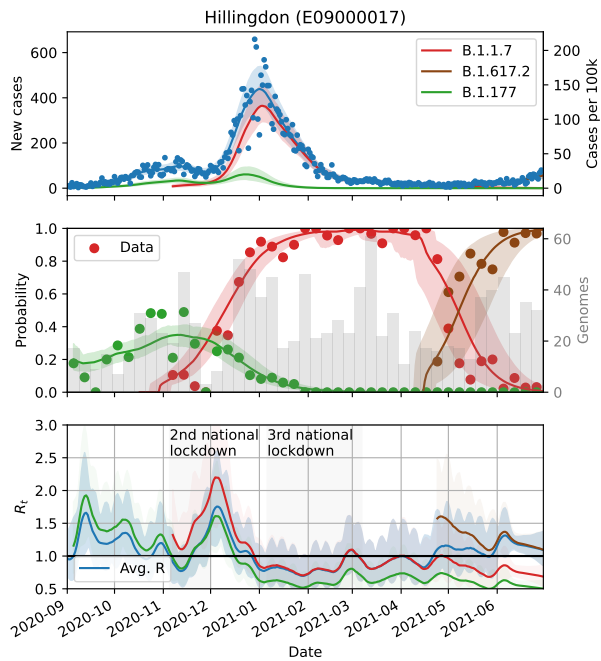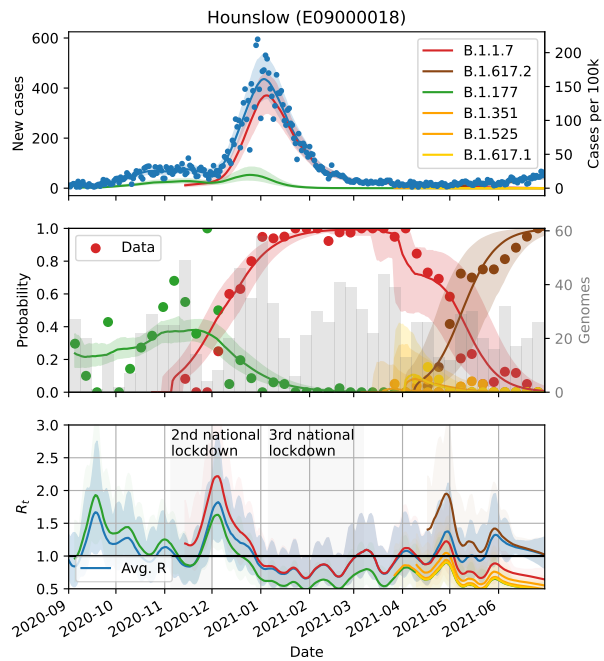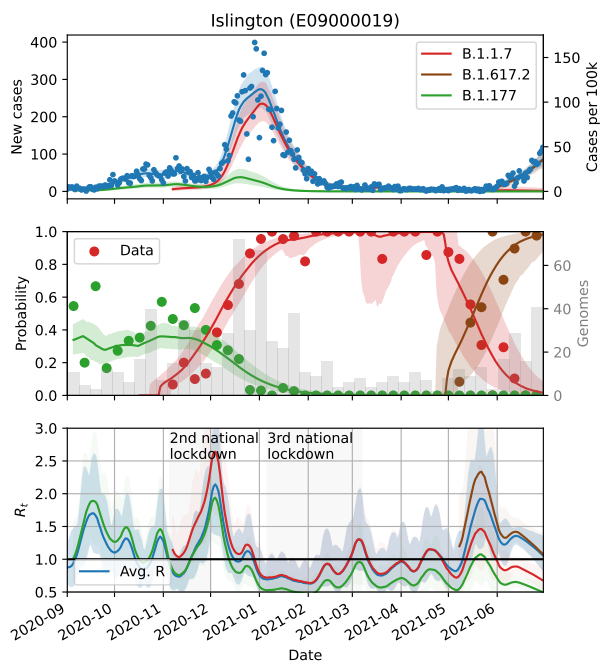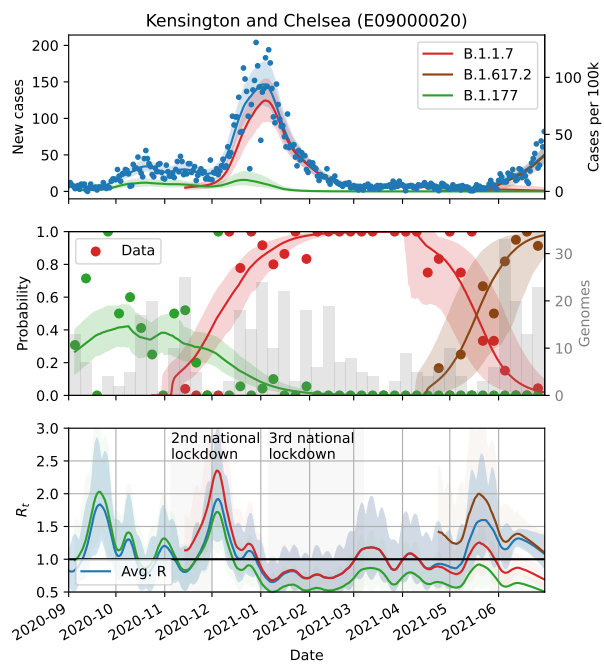

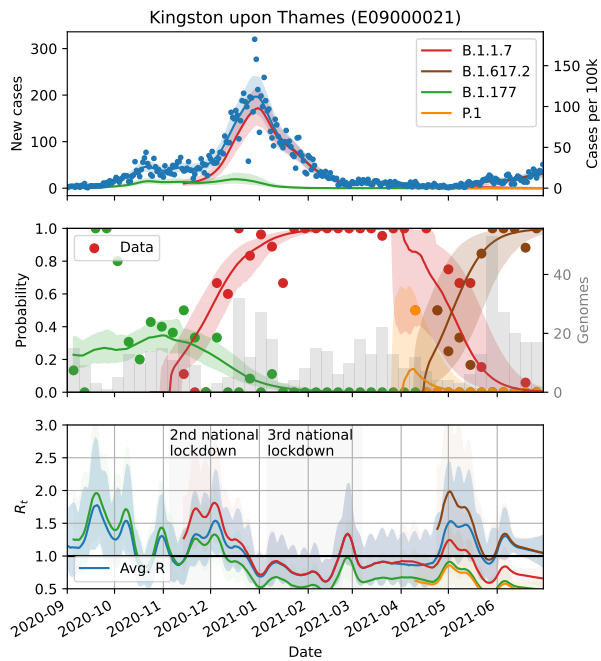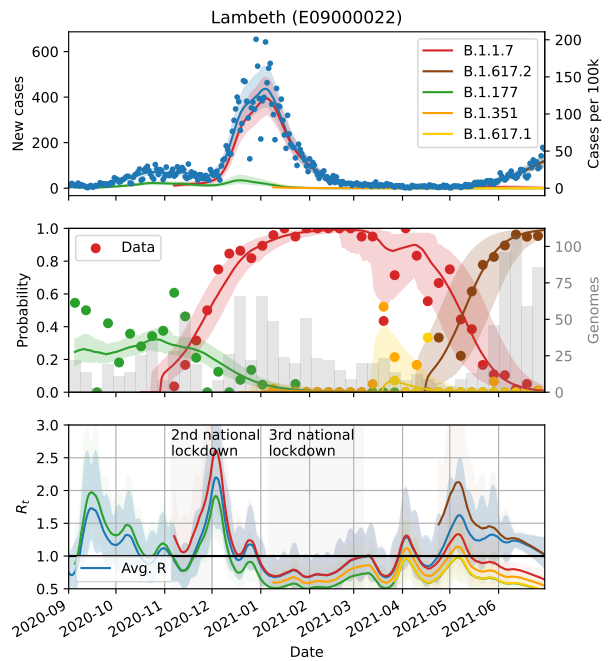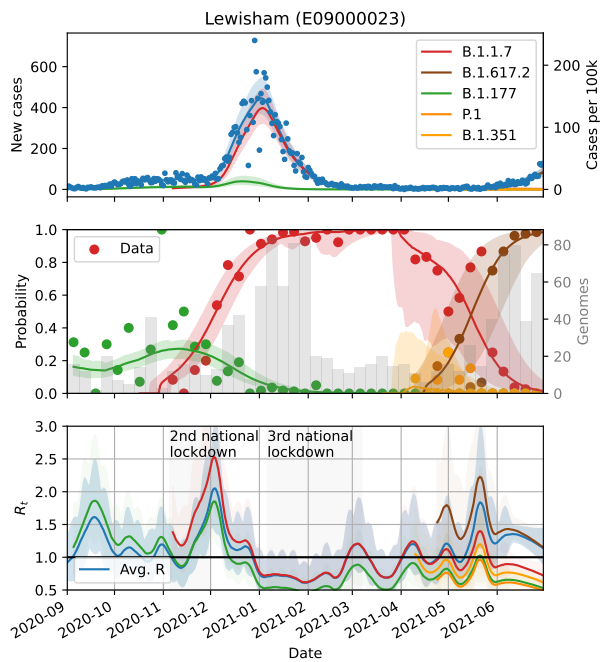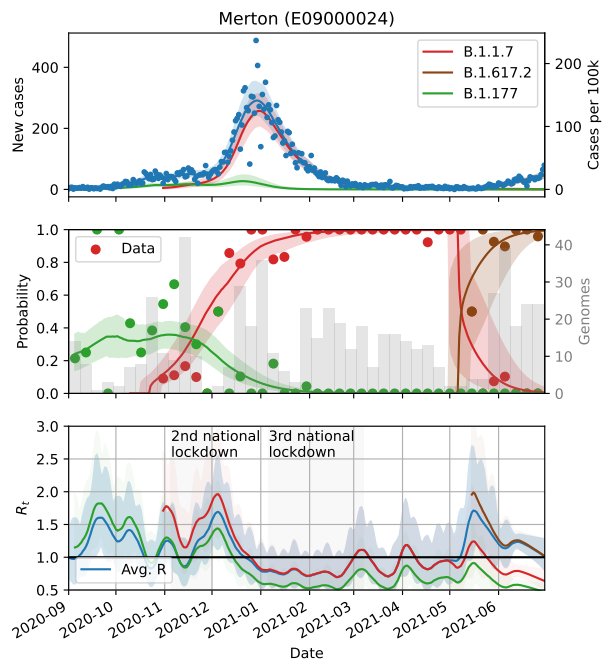

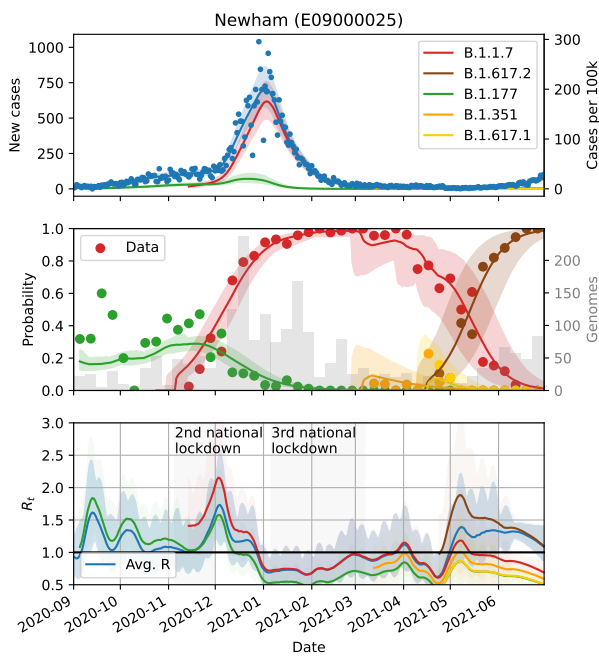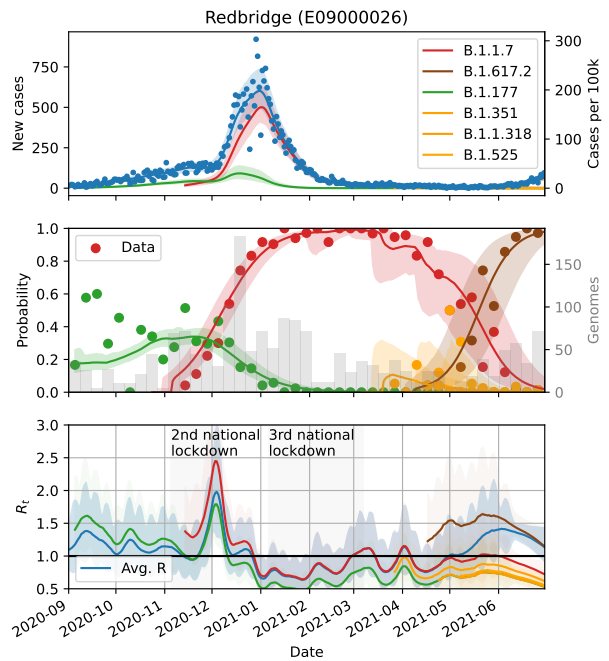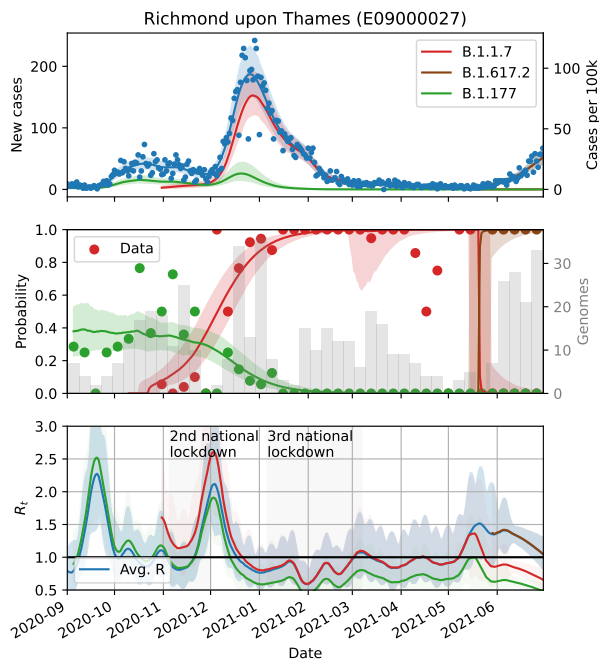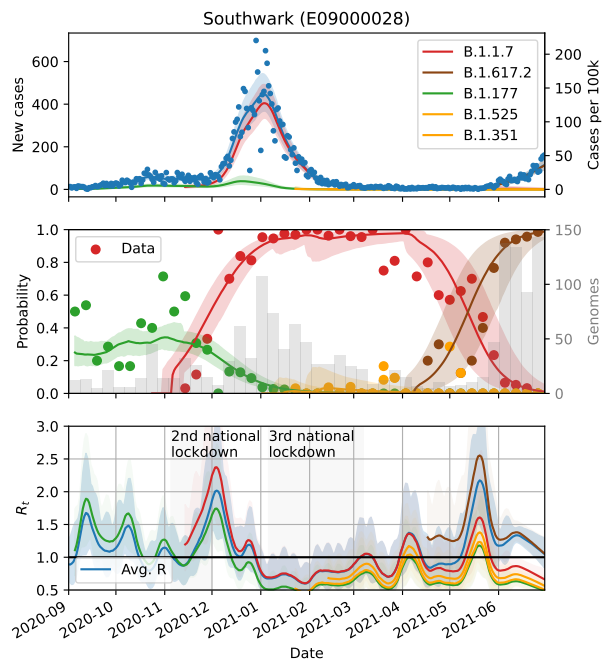



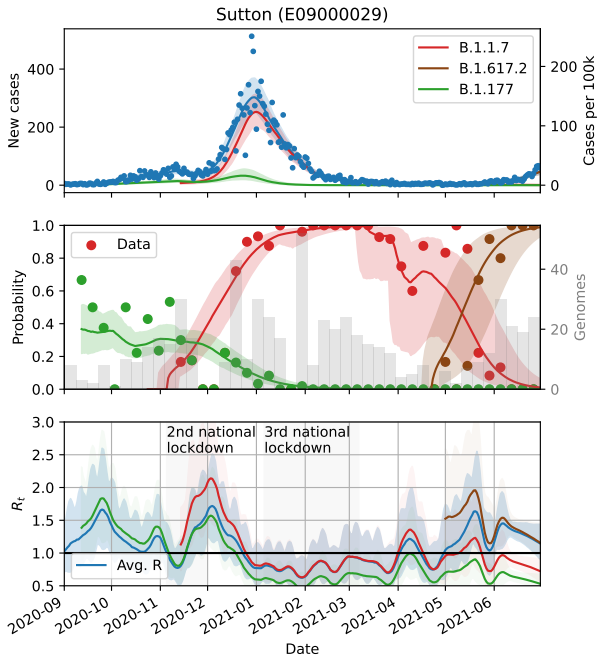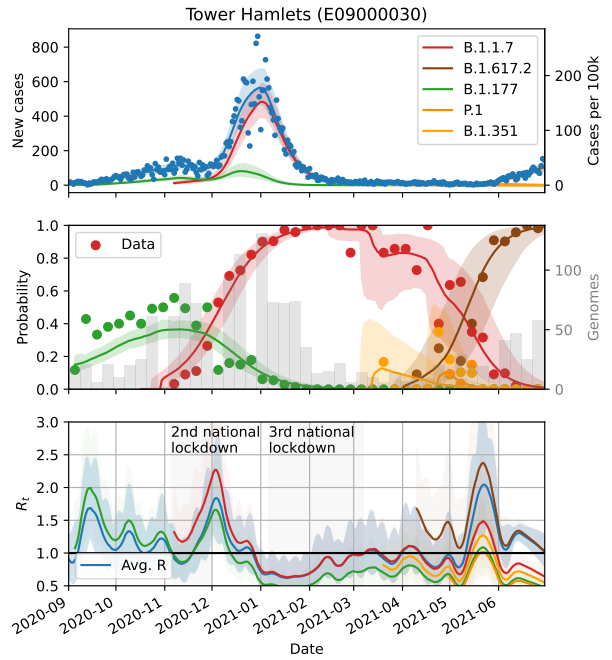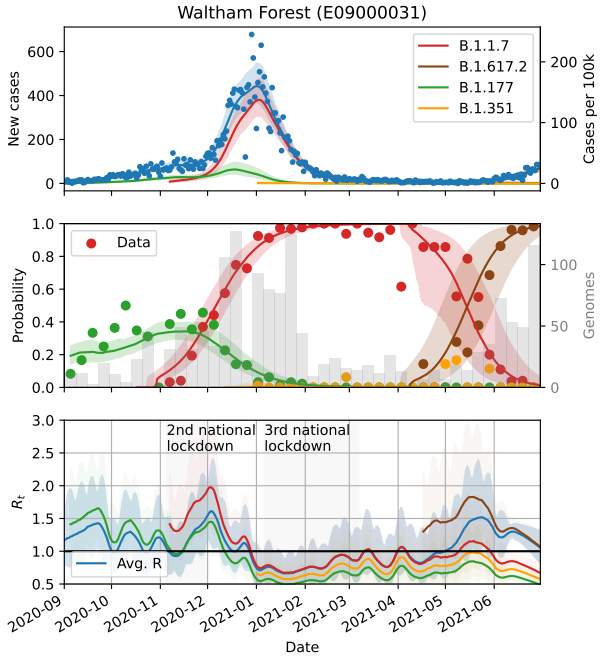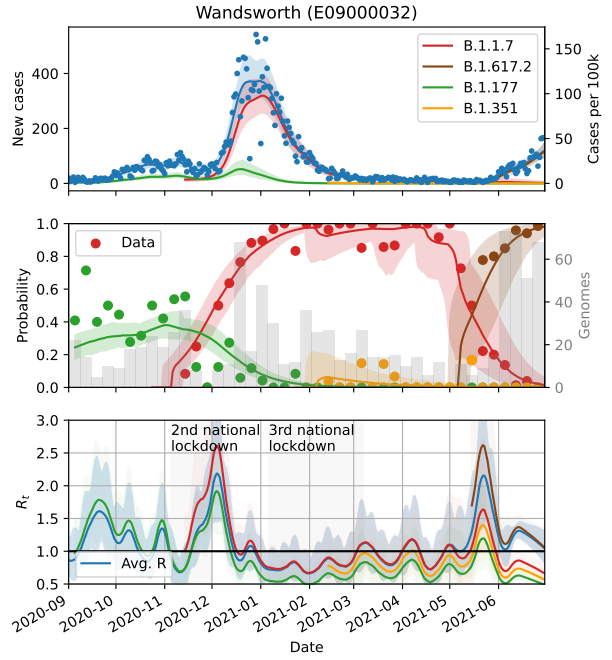

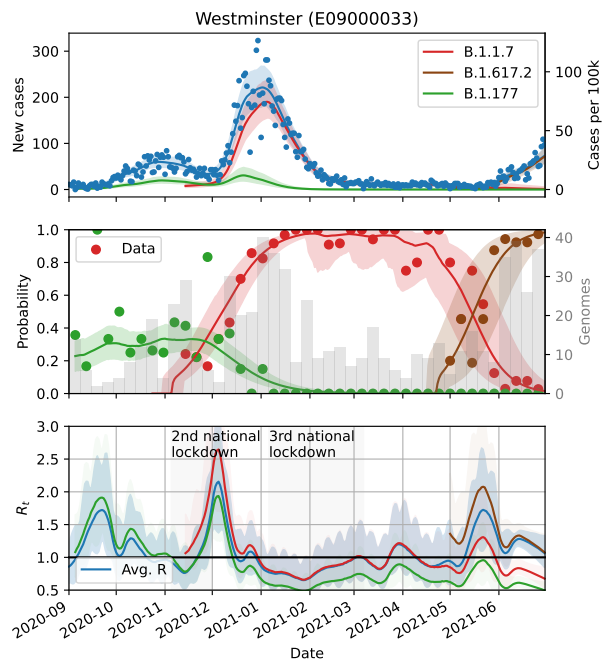

### 3 Supplementary Note 3

Supplementary Note 3 Tab. 1: **Lower Tier Local Authorities (LTLA) lookup codes and names.**

|    | LTLA look up code | LTLA name                    |
|----|-------------------|------------------------------|
| 0  | E06000001         | Hartlepool                   |
| 1  | E06000002         | Middlesbrough                |
| 2  | E06000003         | Redcar and Cleveland         |
| 3  | E06000004         | Stockton-on-Tees             |
| 4  | E06000005         | Darlington                   |
| 5  | E06000006         | Halton                       |
| 6  | E06000007         | Warrington                   |
| 7  | E06000008         | Blackburn with Darwen        |
| 8  | E06000009         | Blackpool                    |
| 9  | E06000010         | Kingston upon Hull, City of  |
| 10 | E06000011         | East Riding of Yorkshire     |
| 11 | E06000012         | North East Lincolnshire      |
| 12 | E06000013         | North Lincolnshire           |
| 13 | E06000014         | York                         |
| 14 | E06000015         | Derby                        |
| 15 | E06000016         | Leicester                    |
| 16 | E06000017         | Rutland                      |
| 17 | E06000018         | Nottingham                   |
| 18 | E06000019         | Herefordshire, County of     |
| 19 | E06000020         | Telford and Wrekin           |
| 20 | E06000021         | Stoke-on-Trent               |
| 21 | E06000022         | Bath and North East Somerset |
| 22 | E06000023         | Bristol, City of             |
| 23 | E06000024         | North Somerset               |
| 24 | E06000025         | South Gloucestershire        |
| 25 | E06000026         | Plymouth                     |
| 26 | E06000027         | Torbay                       |
| 27 | E06000030         | Swindon                      |
| 28 | E06000031         | Peterborough                 |
| 29 | E06000032         | Luton                        |
| 30 | E06000033         | Southend-on-Sea              |

Continued on next page

|    | LTLA look up code | LTLA name                           |
|----|-------------------|-------------------------------------|
| 31 | E06000034         | Thurrock                            |
| 32 | E06000035         | Medway                              |
| 33 | E06000036         | Bracknell Forest                    |
| 34 | E06000037         | West Berkshire                      |
| 35 | E06000038         | Reading                             |
| 36 | E06000039         | Slough                              |
| 37 | E06000040         | Windsor and Maidenhead              |
| 38 | E06000041         | Wokingham                           |
| 39 | E06000042         | Milton Keynes                       |
| 40 | E06000043         | Brighton and Hove                   |
| 41 | E06000044         | Portsmouth                          |
| 42 | E06000045         | Southampton                         |
| 43 | E06000046         | Isle of Wight                       |
| 44 | E06000047         | County Durham                       |
| 45 | E06000049         | Cheshire East                       |
| 46 | E06000050         | Cheshire West and Chester           |
| 47 | E06000051         | Shropshire                          |
| 48 | E06000052         | Cornwall                            |
| 49 | E06000053         | Isles of Scilly                     |
| 50 | E06000054         | Wiltshire                           |
| 51 | E06000055         | Bedford                             |
| 52 | E06000056         | Central Bedfordshire                |
| 53 | E06000057         | Northumberland                      |
| 54 | E06000058         | Bournemouth, Christchurch and Poole |
| 55 | E06000059         | Dorset                              |
| 56 | E07000004         | Aylesbury Vale                      |
| 57 | E07000005         | Chiltern                            |
| 58 | E07000006         | South Bucks                         |
| 59 | E07000007         | Wycombe                             |
| 60 | E07000008         | Cambridge                           |
| 61 | E07000009         | East Cambridgeshire                 |
| 62 | E07000010         | Fenland                             |
| 63 | E07000011         | Huntingdonshire                     |
| 64 | E07000012         | South Cambridgeshire                |
| 65 | E07000026         | Allerdale                           |

Continued on next page

|     | LTLA look up code | LTLA name             |
|-----|-------------------|-----------------------|
| 66  | E07000027         | Barrow-in-Furness     |
| 67  | E07000028         | Carlisle              |
| 68  | E07000029         | Copeland              |
| 69  | E07000030         | Eden                  |
| 70  | E07000031         | South Lakeland        |
| 71  | E07000032         | Amber Valley          |
| 72  | E07000033         | Bolsover              |
| 73  | E07000034         | Chesterfield          |
| 74  | E07000035         | Derbyshire Dales      |
| 75  | E07000036         | Erewash               |
| 76  | E07000037         | High Peak             |
| 77  | E07000038         | North East Derbyshire |
| 78  | E07000039         | South Derbyshire      |
| 79  | E07000040         | East Devon            |
| 80  | E07000041         | Exeter                |
| 81  | E07000042         | Mid Devon             |
| 82  | E07000043         | North Devon           |
| 83  | E07000044         | South Hams            |
| 84  | E07000045         | Teignbridge           |
| 85  | E07000046         | Torridge              |
| 86  | E07000047         | West Devon            |
| 87  | E07000061         | Eastbourne            |
| 88  | E07000062         | Hastings              |
| 89  | E07000063         | Lewes                 |
| 90  | E07000064         | Rother                |
| 91  | E07000065         | Wealden               |
| 92  | E07000066         | Basildon              |
| 93  | E07000067         | Braintree             |
| 94  | E07000068         | Brentwood             |
| 95  | E07000069         | Castle Point          |
| 96  | E07000070         | Chelmsford            |
| 97  | E07000071         | Colchester            |
| 98  | E07000072         | Epping Forest         |
| 99  | E07000073         | Harlow                |
| 100 | E07000074         | Maldon                |

Continued on next page

|     | LTLA look up code | LTLA name             |
|-----|-------------------|-----------------------|
| 101 | E07000075         | Rochford              |
| 102 | E07000076         | Tendring              |
| 103 | E07000077         | Uttlesford            |
| 104 | E07000078         | Cheltenham            |
| 105 | E07000079         | Cotswold              |
| 106 | E07000080         | Forest of Dean        |
| 107 | E07000081         | Gloucester            |
| 108 | E07000082         | Stroud                |
| 109 | E07000083         | Tewkesbury            |
| 110 | E07000084         | Basingstoke and Deane |
| 111 | E07000085         | East Hampshire        |
| 112 | E07000086         | Eastleigh             |
| 113 | E07000087         | Fareham               |
| 114 | E07000088         | Gosport               |
| 115 | E07000089         | Hart                  |
| 116 | E07000090         | Havant                |
| 117 | E07000091         | New Forest            |
| 118 | E07000092         | Rushmoor              |
| 119 | E07000093         | Test Valley           |
| 120 | E07000094         | Winchester            |
| 121 | E07000095         | Broxbourne            |
| 122 | E07000096         | Dacorum               |
| 123 | E07000098         | Hertsmere             |
| 124 | E07000099         | North Hertfordshire   |
| 125 | E07000102         | Three Rivers          |
| 126 | E07000103         | Watford               |
| 127 | E07000105         | Ashford               |
| 128 | E07000106         | Canterbury            |
| 129 | E07000107         | Dartford              |
| 130 | E07000108         | Dover                 |
| 131 | E07000109         | Gravesham             |
| 132 | E07000110         | Maidstone             |
| 133 | E07000111         | Sevenoaks             |
| 134 | E07000112         | Folkestone and Hythe  |
| 135 | E07000113         | Swale                 |

Continued on next page

|     | LTLA look up code | LTLA name                    |
|-----|-------------------|------------------------------|
| 136 | E07000114         | Thanet                       |
| 137 | E07000115         | Tonbridge and Malling        |
| 138 | E07000116         | Tunbridge Wells              |
| 139 | E07000117         | Burnley                      |
| 140 | E07000118         | Chorley                      |
| 141 | E07000119         | Fylde                        |
| 142 | E07000120         | Hyndburn                     |
| 143 | E07000121         | Lancaster                    |
| 144 | E07000122         | Pendle                       |
| 145 | E07000123         | Preston                      |
| 146 | E07000124         | Ribble Valley                |
| 147 | E07000125         | Rossendale                   |
| 148 | E07000126         | South Ribble                 |
| 149 | E07000127         | West Lancashire              |
| 150 | E07000128         | Wyre                         |
| 151 | E07000129         | Blaby                        |
| 152 | E07000130         | Charnwood                    |
| 153 | E07000131         | Harborough                   |
| 154 | E07000132         | Hinckley and Bosworth        |
| 155 | E07000133         | Melton                       |
| 156 | E07000134         | North West Leicestershire    |
| 157 | E07000135         | Oadby and Wigston            |
| 158 | E07000136         | Boston                       |
| 159 | E07000137         | East Lindsey                 |
| 160 | E07000138         | Lincoln                      |
| 161 | E07000139         | North Kesteven               |
| 162 | E07000140         | South Holland                |
| 163 | E07000141         | South Kesteven               |
| 164 | E07000142         | West Lindsey                 |
| 165 | E07000143         | Breckland                    |
| 166 | E07000144         | Broadland                    |
| 167 | E07000145         | Great Yarmouth               |
| 168 | E07000146         | King's Lynn and West Norfolk |
| 169 | E07000147         | North Norfolk                |
| 170 | E07000148         | Norwich                      |

Continued on next page



|     | LTLA look up code | LTLA name              |
|-----|-------------------|------------------------|
| 171 | E07000149         | South Norfolk          |
| 172 | E07000150         | Corby                  |
| 173 | E07000151         | Daventry               |
| 174 | E07000152         | East Northamptonshire  |
| 175 | E07000153         | Kettering              |
| 176 | E07000154         | Northampton            |
| 177 | E07000155         | South Northamptonshire |
| 178 | E07000156         | Wellingborough         |
| 179 | E07000163         | Craven                 |
| 180 | E07000164         | Hambleton              |
| 181 | E07000165         | Harrogate              |
| 182 | E07000166         | Richmondshire          |
| 183 | E07000167         | Ryedale                |
| 184 | E07000168         | Scarborough            |
| 185 | E07000169         | Selby                  |
| 186 | E07000170         | Ashfield               |
| 187 | E07000171         | Bassetlaw              |
| 188 | E07000172         | Broxtowe               |
| 189 | E07000173         | Gedling                |
| 190 | E07000174         | Mansfield              |
| 191 | E07000175         | Newark and Sherwood    |
| 192 | E07000176         | Rushcliffe             |
| 193 | E07000177         | Cherwell               |
| 194 | E07000178         | Oxford                 |
| 195 | E07000179         | South Oxfordshire      |
| 196 | E07000180         | Vale of White Horse    |
| 197 | E07000181         | West Oxfordshire       |
| 198 | E07000187         | Mendip                 |
| 199 | E07000188         | Sedgemoor              |
| 200 | E07000189         | South Somerset         |
| 201 | E07000192         | Cannock Chase          |
| 202 | E07000193         | East Staffordshire     |
| 203 | E07000194         | Lichfield              |
| 204 | E07000195         | Newcastle-under-Lyme   |
| 205 | E07000196         | South Staffordshire    |

Continued on next page

|     | LTLA look up code | LTLA name               |
|-----|-------------------|-------------------------|
| 206 | E07000197         | Stafford                |
| 207 | E07000198         | Staffordshire Moorlands |
| 208 | E07000199         | Tamworth                |
| 209 | E07000200         | Babergh                 |
| 210 | E07000202         | Ipswich                 |
| 211 | E07000203         | Mid Suffolk             |
| 212 | E07000207         | Elmbridge               |
| 213 | E07000208         | Epsom and Ewell         |
| 214 | E07000209         | Guildford               |
| 215 | E07000210         | Mole Valley             |
| 216 | E07000211         | Reigate and Banstead    |
| 217 | E07000212         | Runnymede               |
| 218 | E07000213         | Spelthorne              |
| 219 | E07000214         | Surrey Heath            |
| 220 | E07000215         | Tandridge               |
| 221 | E07000216         | Waverley                |
| 222 | E07000217         | Woking                  |
| 223 | E07000218         | North Warwickshire      |
| 224 | E07000219         | Nuneaton and Bedworth   |
| 225 | E07000220         | Rugby                   |
| 226 | E07000221         | Stratford-on-Avon       |
| 227 | E07000222         | Warwick                 |
| 228 | E07000223         | Adur                    |
| 229 | E07000224         | Arun                    |
| 230 | E07000225         | Chichester              |
| 231 | E07000226         | Crawley                 |
| 232 | E07000227         | Horsham                 |
| 233 | E07000228         | Mid Sussex              |
| 234 | E07000229         | Worthing                |
| 235 | E07000234         | Bromsgrove              |
| 236 | E07000235         | Malvern Hills           |
| 237 | E07000236         | Redditch                |
| 238 | E07000237         | Worcester               |
| 239 | E07000238         | Wychavon                |
| 240 | E07000239         | Wyre Forest             |

Continued on next page

|     | LTLA look up code | LTLA name                 |
|-----|-------------------|---------------------------|
| 241 | E07000240         | St Albans                 |
| 242 | E07000241         | Welwyn Hatfield           |
| 243 | E07000242         | East Hertfordshire        |
| 244 | E07000243         | Stevenage                 |
| 245 | E07000244         | East Suffolk              |
| 246 | E07000245         | West Suffolk              |
| 247 | E07000246         | Somerset West and Taunton |
| 248 | E08000001         | Bolton                    |
| 249 | E08000002         | Bury                      |
| 250 | E08000003         | Manchester                |
| 251 | E08000004         | Oldham                    |
| 252 | E08000005         | Rochdale                  |
| 253 | E08000006         | Salford                   |
| 254 | E08000007         | Stockport                 |
| 255 | E08000008         | Tameside                  |
| 256 | E08000009         | Trafford                  |
| 257 | E08000010         | Wigan                     |
| 258 | E08000011         | Knowsley                  |
| 259 | E08000012         | Liverpool                 |
| 260 | E08000013         | St. Helens                |
| 261 | E08000014         | Sefton                    |
| 262 | E08000015         | Wirral                    |
| 263 | E08000016         | Barnsley                  |
| 264 | E08000017         | Doncaster                 |
| 265 | E08000018         | Rotherham                 |
| 266 | E08000019         | Sheffield                 |
| 267 | E08000021         | Newcastle upon Tyne       |
| 268 | E08000022         | North Tyneside            |
| 269 | E08000023         | South Tyneside            |
| 270 | E08000024         | Sunderland                |
| 271 | E08000025         | Birmingham                |
| 272 | E08000026         | Coventry                  |
| 273 | E08000027         | Dudley                    |
| 274 | E08000028         | Sandwell                  |
| 275 | E08000029         | Solihull                  |

Continued on next page

|     | LTLA look up code | LTLA name              |
|-----|-------------------|------------------------|
| 276 | E08000030         | Walsall                |
| 277 | E08000031         | Wolverhampton          |
| 278 | E08000032         | Bradford               |
| 279 | E08000033         | Calderdale             |
| 280 | E08000034         | Kirklees               |
| 281 | E08000035         | Leeds                  |
| 282 | E08000036         | Wakefield              |
| 283 | E08000037         | Gateshead              |
| 284 | E09000001         | City of London         |
| 285 | E09000002         | Barking and Dagenham   |
| 286 | E09000003         | Barnet                 |
| 287 | E09000004         | Bexley                 |
| 288 | E09000005         | Brent                  |
| 289 | E09000006         | Bromley                |
| 290 | E09000007         | Camden                 |
| 291 | E09000008         | Croydon                |
| 292 | E09000009         | Ealing                 |
| 293 | E09000010         | Enfield                |
| 294 | E09000011         | Greenwich              |
| 295 | E09000012         | Hackney                |
| 296 | E09000013         | Hammersmith and Fulham |
| 297 | E09000014         | Haringey               |
| 298 | E09000015         | Harrow                 |
| 299 | E09000016         | Havering               |
| 300 | E09000017         | Hillingdon             |
| 301 | E09000018         | Hounslow               |
| 302 | E09000019         | Islington              |
| 303 | E09000020         | Kensington and Chelsea |
| 304 | E09000021         | Kingston upon Thames   |
| 305 | E09000022         | Lambeth                |
| 306 | E09000023         | Lewisham               |
| 307 | E09000024         | Merton                 |
| 308 | E09000025         | Newham                 |
| 309 | E09000026         | Redbridge              |
| 310 | E09000027         | Richmond upon Thames   |

Continued on next page

---

|     | LTLA look up code | LTLA name      |
|-----|-------------------|----------------|
| 311 | E09000028         | Southwark      |
| 312 | E09000029         | Sutton         |
| 313 | E09000030         | Tower Hamlets  |
| 314 | E09000031         | Waltham Forest |
| 315 | E09000032         | Wandsworth     |
| 316 | E09000033         | Westminster    |

---
